# Supplementary material for: Deep-time geographic dynamics of climate shape global vascular plant diversity
Source: Research Square preprint supplement (doi:10.21203/rs.3.rs-8229707/v1), 2026-01-08
Supplement: Supplementary file 1 [file 40ca3b9e8cd546e76593652e.pdf]

# Deep-time geographic dynamics of climate shape global vascular plant diversity

Jiaze Li<sup>1</sup>, Iain Colin Prentice<sup>1,2</sup>

<sup>1</sup>*Georgina Mace Centre for the Living Planet, Department of Life Sciences, Imperial College  
London, Silwood Park Campus, Buckhurst Road, Ascot, SL5 7PY, UK*

<sup>2</sup>*Department of Earth System Science, Ministry of Education Key Laboratory for Earth System  
Modeling, Institute for Global Change Studies, Tsinghua University, Beijing 100084, China*

Corresponding author: Jiaze Li (email: [jiaze.li19@imperial.ac.uk](mailto:jiaze.li19@imperial.ac.uk))

## Supplementary Information

### SI 1 Supplementary Figures

11 **Fig. S1: Alternative colour gradient scheme illustrating the historical geography of recent**  
 12 **climates.**

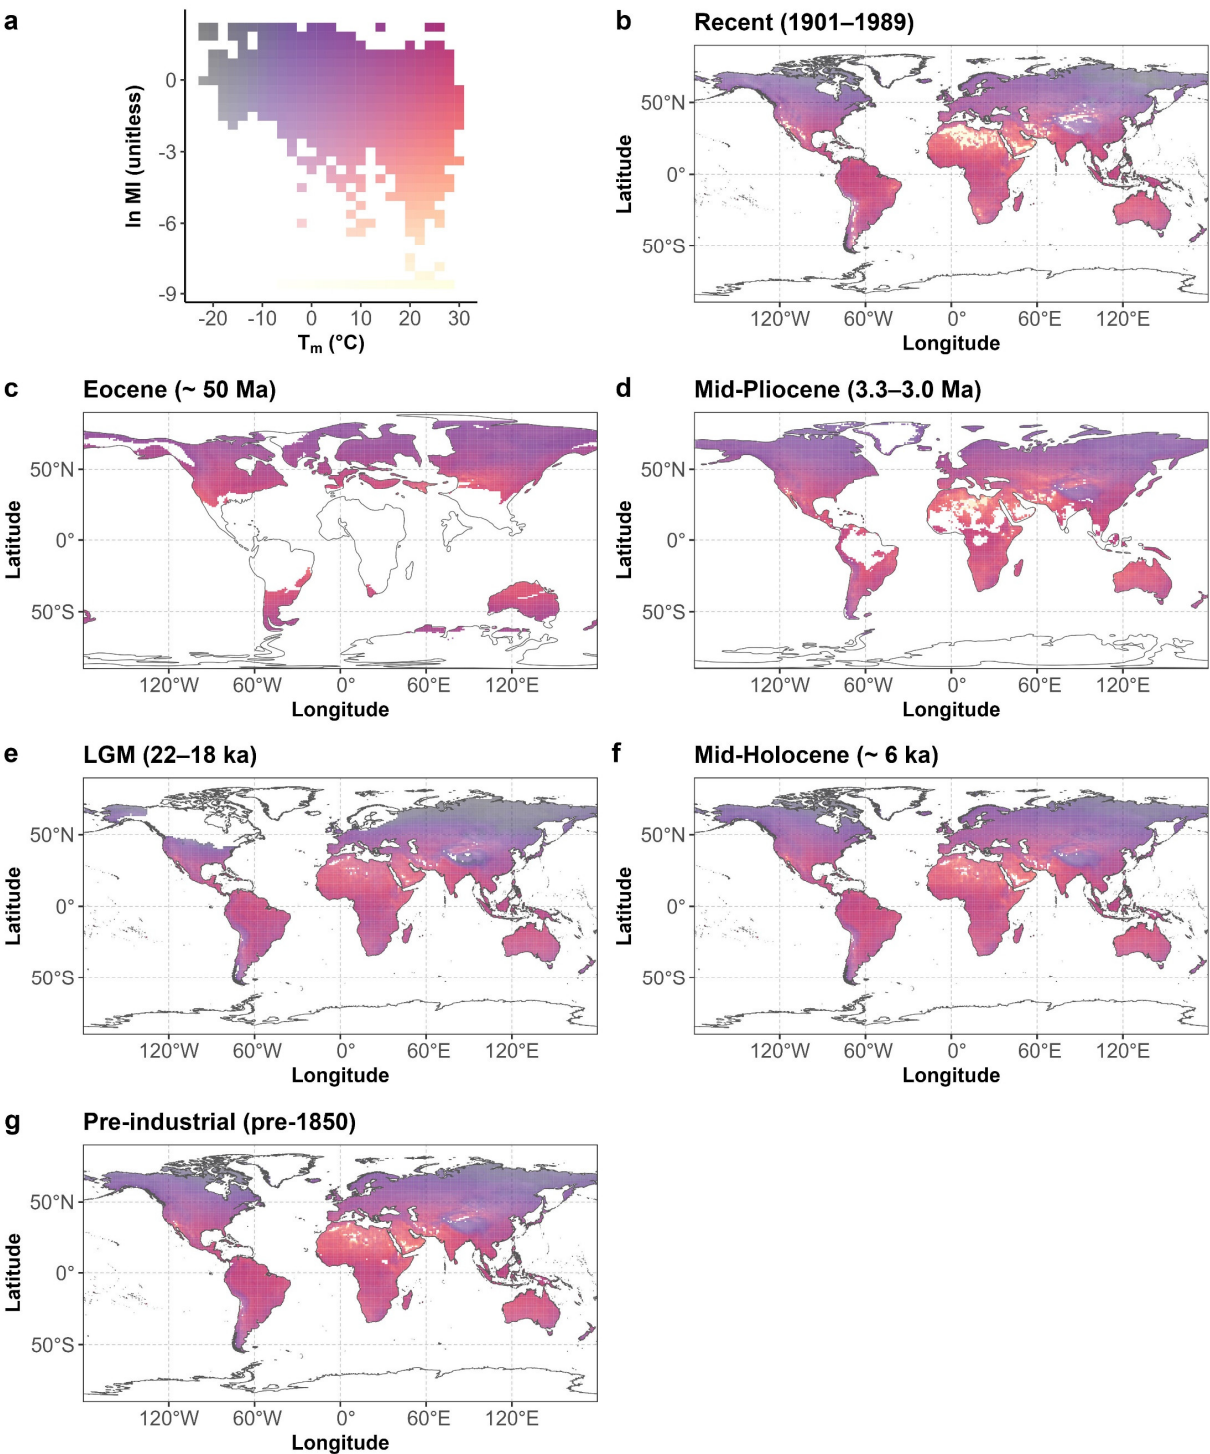

13  
 14 **a**, The two-dimensional climatic space defined by the recent (1901–1989) climatic conditions ( $T_m$   
 15 and ln MI), partitioned into 30 equal intervals along each axis. Each coloured grid cell ('climatic bin')  
 16 represents a unique climatic condition (405 cells in total). **b–g**, Geographic locations where those

17 recent climatic conditions existed during the recent period (1901–1989, **b**), Eocene (*ca.* 50 Ma, **c**),  
18 Mid-Pliocene (3.3–3.0 Ma, **d**), Last Glacial Maximum (LGM, 22–18 ka, **e**), Mid-Holocene (*ca.* 6 ka, **f**)  
19 and pre-industrial period (pre-1850, **g**). Uncoloured areas denote climatic conditions absent during  
20 this period. Colours correspond to those in **a**, with identical colours indicating the same climatic  
21 conditions. All maps are shown at a 1° spatial resolution.

22 **Fig. S2: Another alternative colour gradient scheme illustrating the historical geography of**  
 23 **recent climates.**

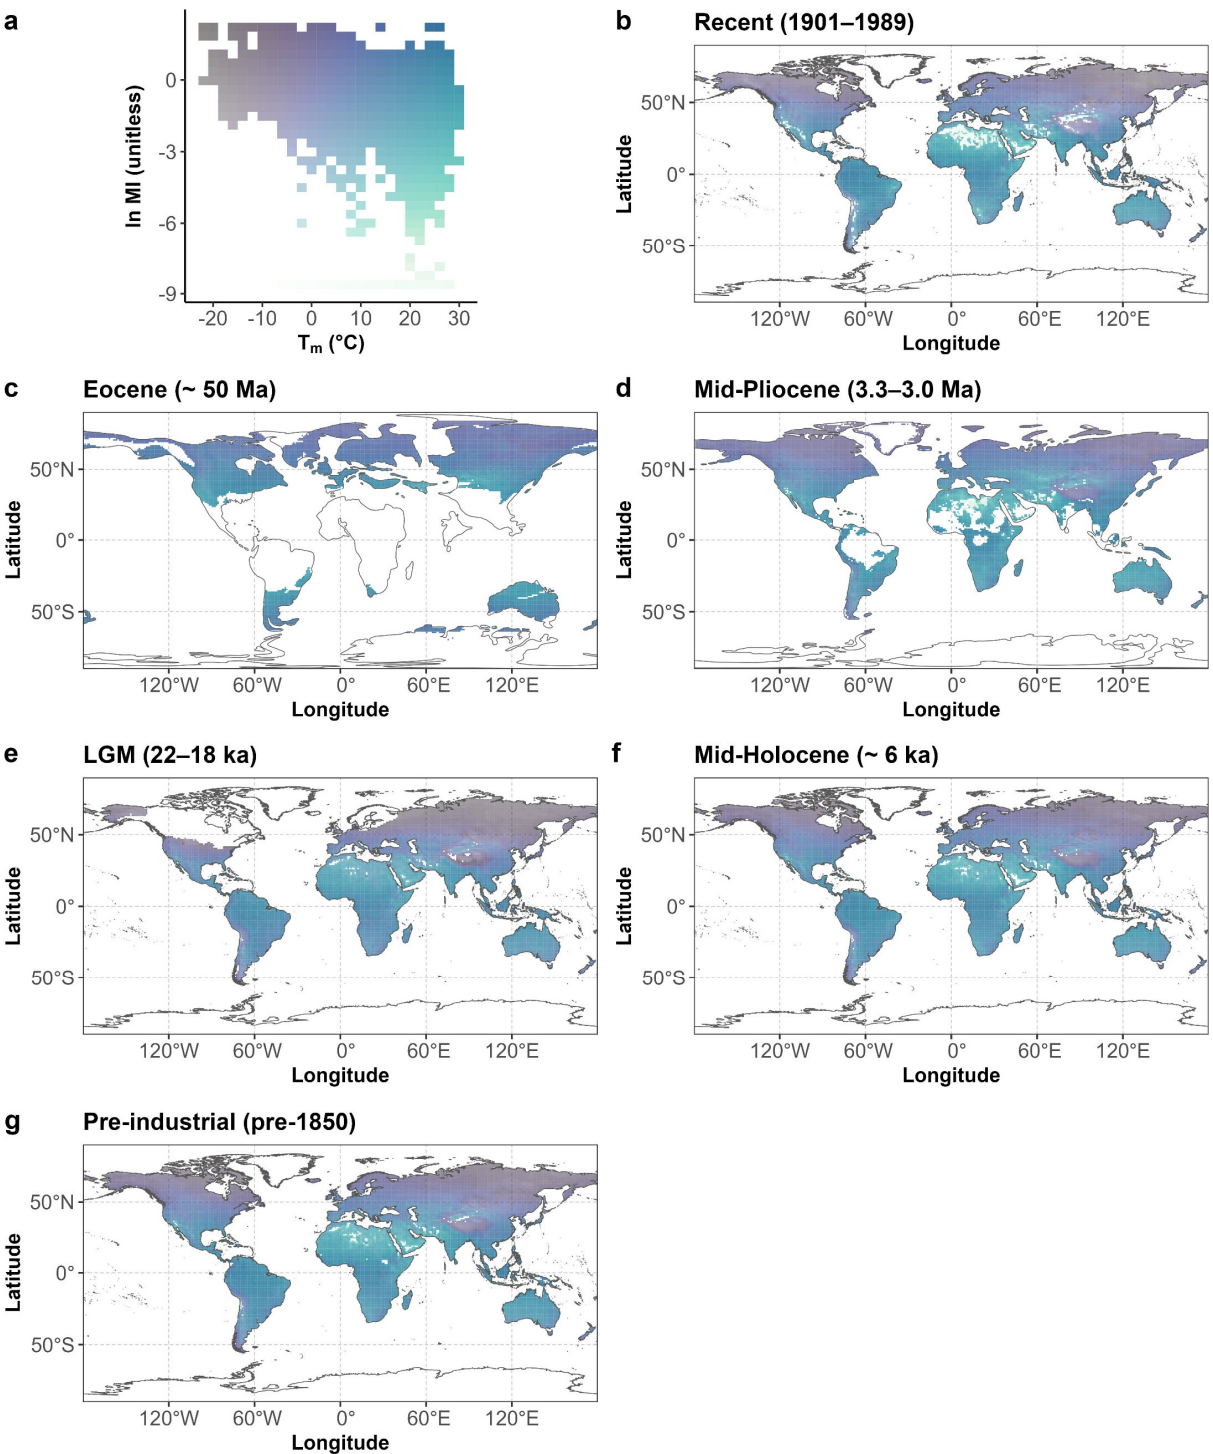

24  
 25 **a**, The two-dimensional climatic space defined by the recent (1901–1989) climatic conditions ( $T_m$   
 26 and  $\ln MI$ ), partitioned into 30 equal intervals along each axis. Each coloured grid cell ('climatic bin')  
 27 represents a unique climatic condition (405 cells in total). **b–g**, Geographic locations where those



28 recent climatic conditions existed during the recent period (1901–1989, **b**), Eocene (*ca.* 50 Ma, **c**),  
29 Mid-Pliocene (3.3–3.0 Ma, **d**), Last Glacial Maximum (LGM, 22–18 ka, **e**), Mid-Holocene (*ca.* 6 ka, **f**)  
30 and pre-industrial period (pre-1850, **g**). Uncoloured areas denote climatic conditions absent during  
31 this period. Colours correspond to those in **a**, with identical colours indicating the same climatic  
32 conditions. All maps are shown at a 1° spatial resolution.

33 **Fig. S3: Global hotspots of vascular plant species richness.**

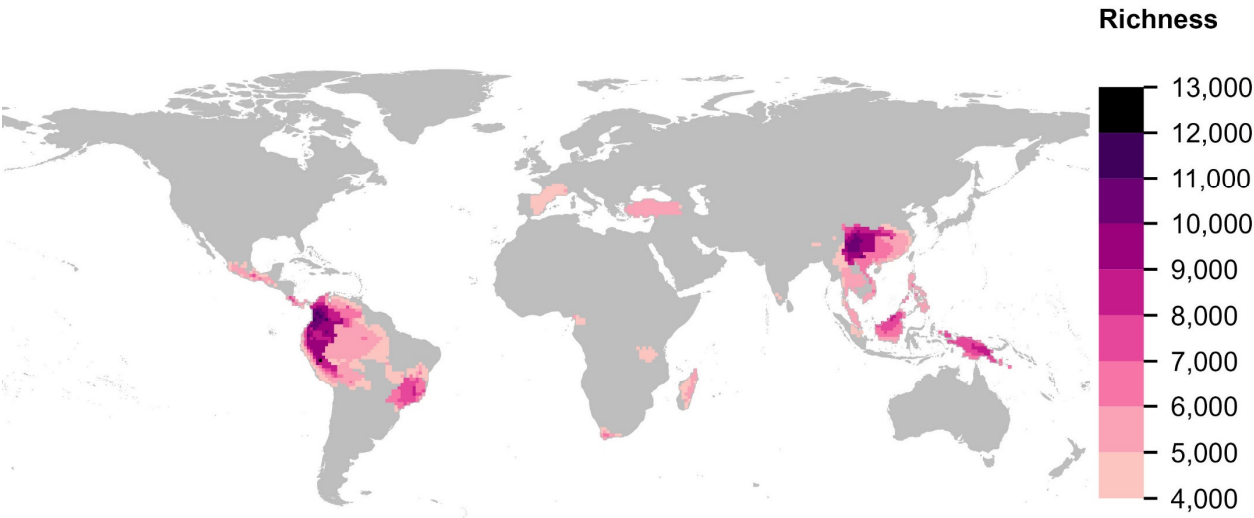

34

35 Global hotspots of vascular plant diversity, defined as regions where species richness exceeds the

36 90th global quantile<sup>1</sup>.

37 **Fig. S4: Vascular plant species richness in climatic space at different resolutions.**

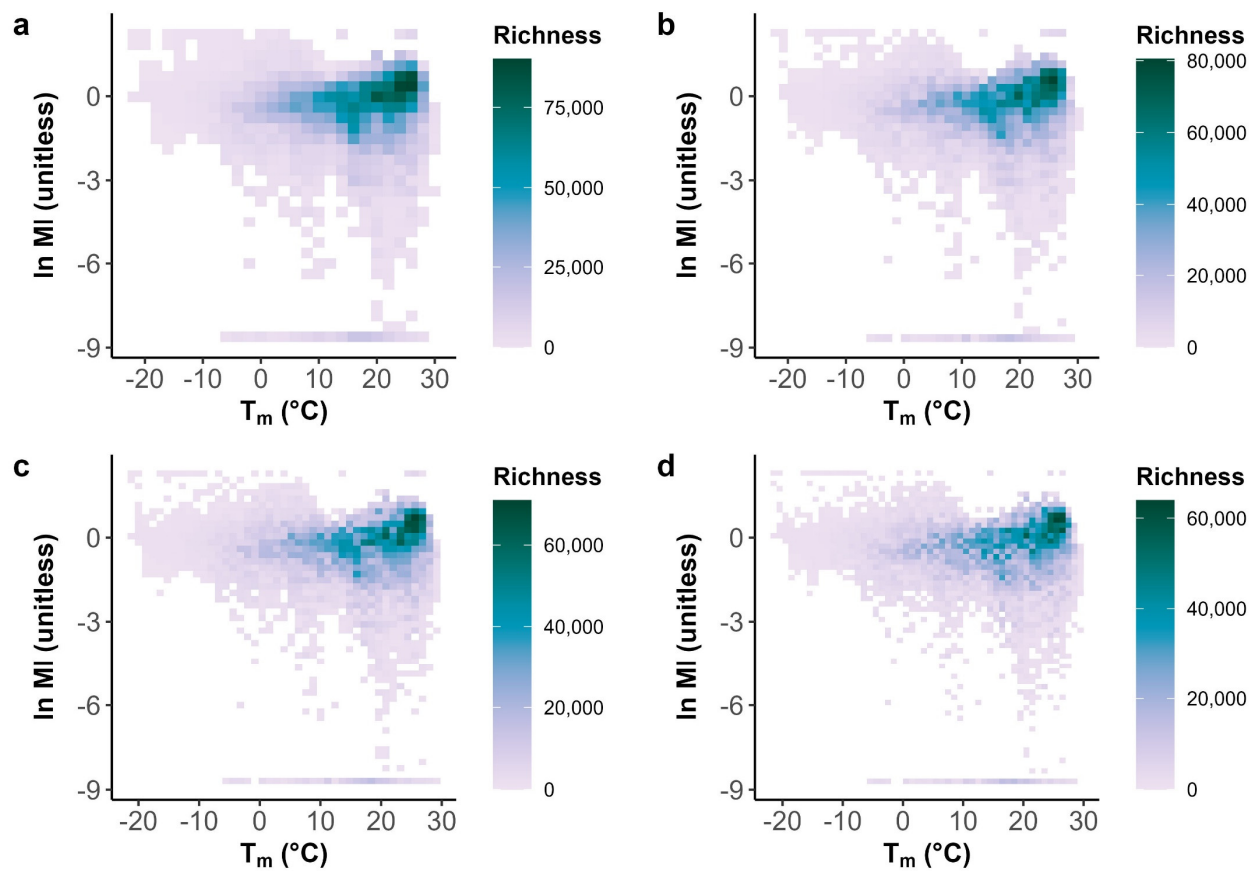

38

39 Species richness is shown per grid cell in climatic space defined by recent climatic conditions ( $T_m$   
40 and  $\ln MI$ ), at four resolutions: 30 (a, 405 cells), 40 (b, 628 cells), 50 (c, 896 cells) and 60 (d, 1182  
41 cells) equal intervals along each axis. Each grid cell ('climatic bin') represents a distinct climatic  
42 condition; colours indicate species richness.  $T_m$  (°C), recent (1901–1989) temperature index;  $\ln MI$   
43 (unitless), recent natural-log-transformed moisture index.

44 **Fig. S5: Vascular plant species turnover in climatic space at different resolutions.**

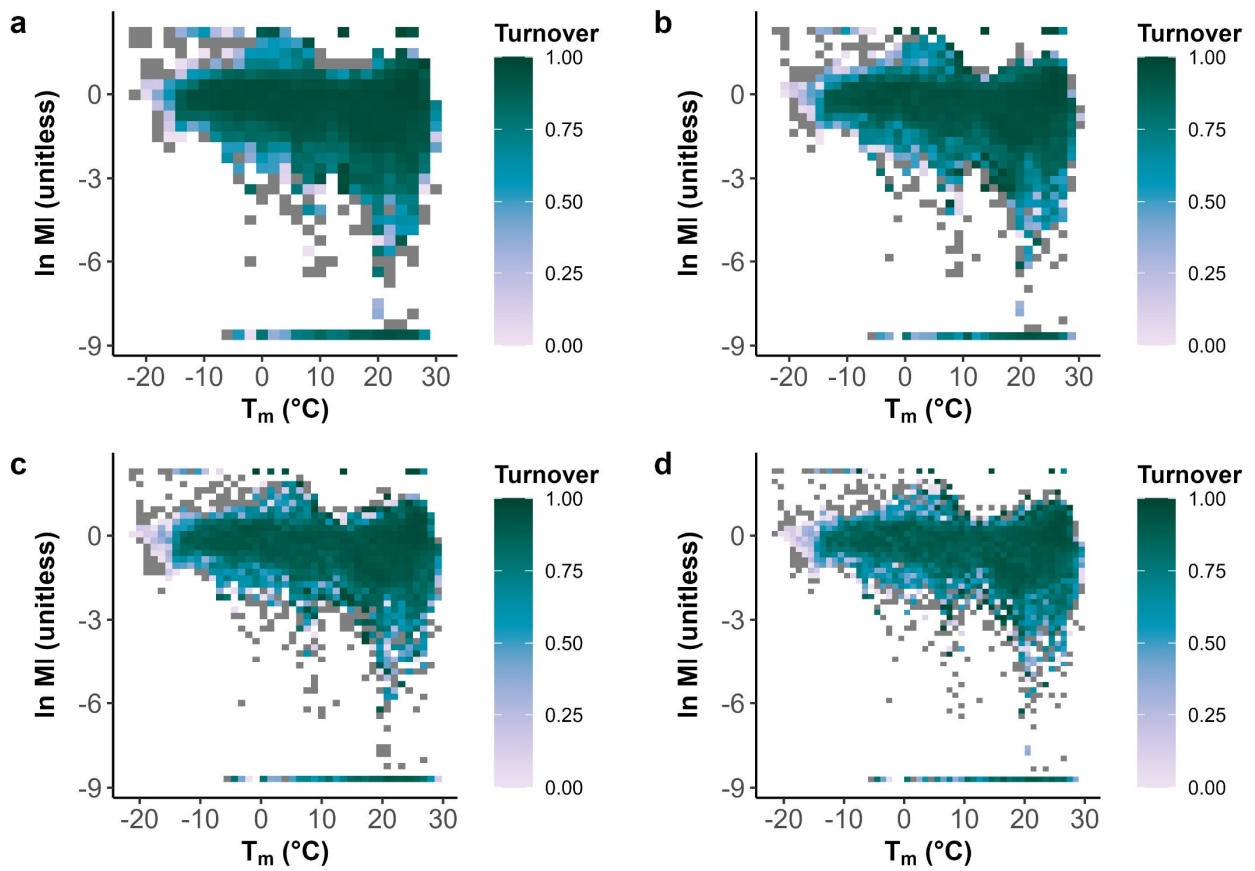

45  
46 Species turnover (the turnover component of beta-diversity) is shown per grid cell in climatic space  
47 defined by recent climatic conditions ( $T_m$  and  $\ln MI$ ), at four resolutions: 30 (a, 405 cells), 40 (b, 628  
48 cells), 50 (c, 896 cells) and 60 (d, 1182 cells) equal intervals along each axis. Each grid cell  
49 ('climatic bin') represents a distinct climatic condition; colours indicate species richness.  $T_m$  (°C),  
50 recent (1901–1989) temperature index;  $\ln MI$  (unitless), recent natural-log-transformed moisture  
51 index.

52 **Fig. S6: Phylogenetic diversity of vascular plants in climatic space at different resolutions.**

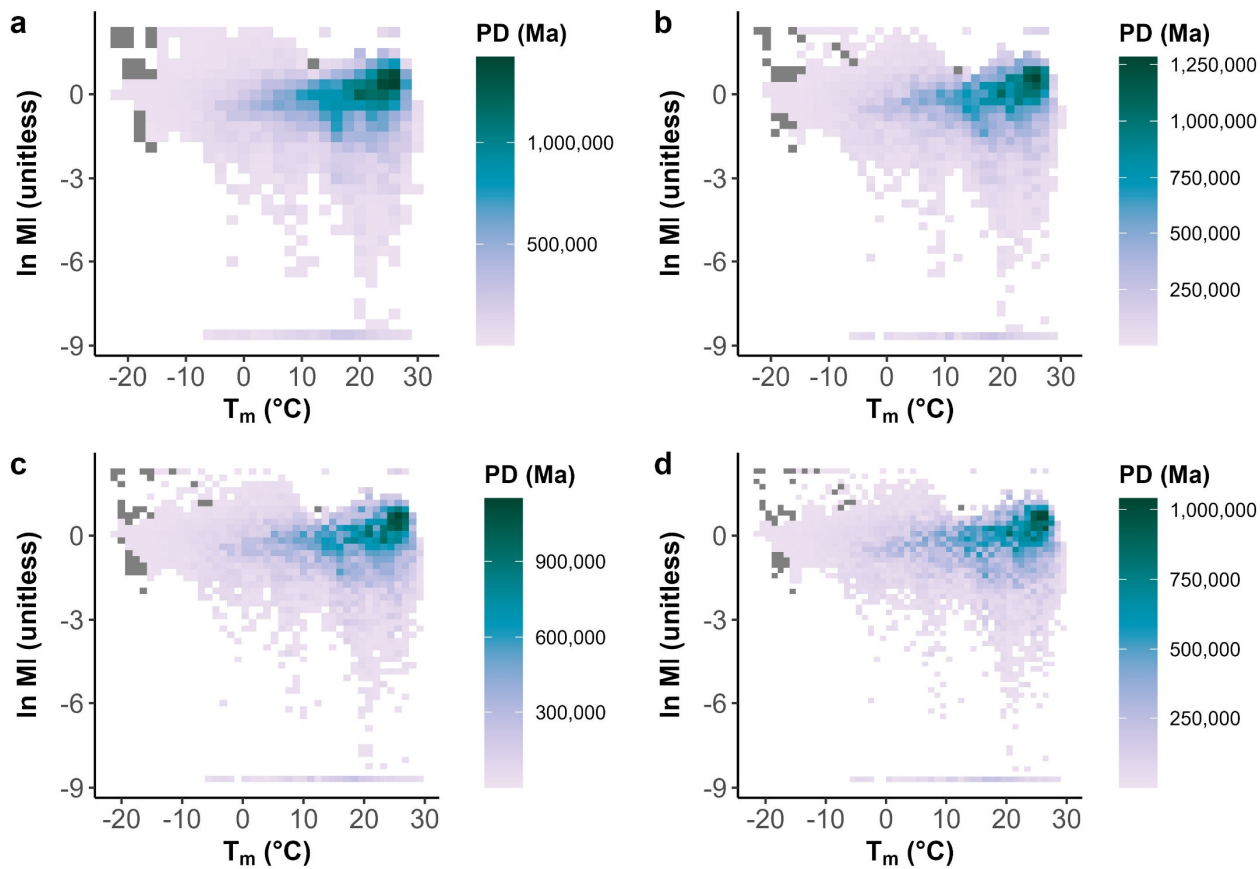

53

54 Phylogenetic diversity (Faith's phylogenetic diversity<sup>2</sup>, PD, Ma) is shown per grid cell in climatic  
55 space defined by recent climatic conditions ( $T_m$  and  $\ln MI$ ), at four resolutions: 30 (a, 405 cells), 40  
56 (b, 628 cells), 50 (c, 896 cells) and 60 (d, 1182 cells) equal intervals along each axis. Each grid cell  
57 ('climatic bin') represents a distinct climatic condition; colours indicate species richness.  $T_m$  (°C),  
58 recent (1901–1989) temperature index;  $\ln MI$  (unitless), recent natural-log-transformed moisture  
59 index.

60 **Fig. S7: Relative phylogenetic diversity of vascular plants in climatic space at different**  
61 **resolutions.**

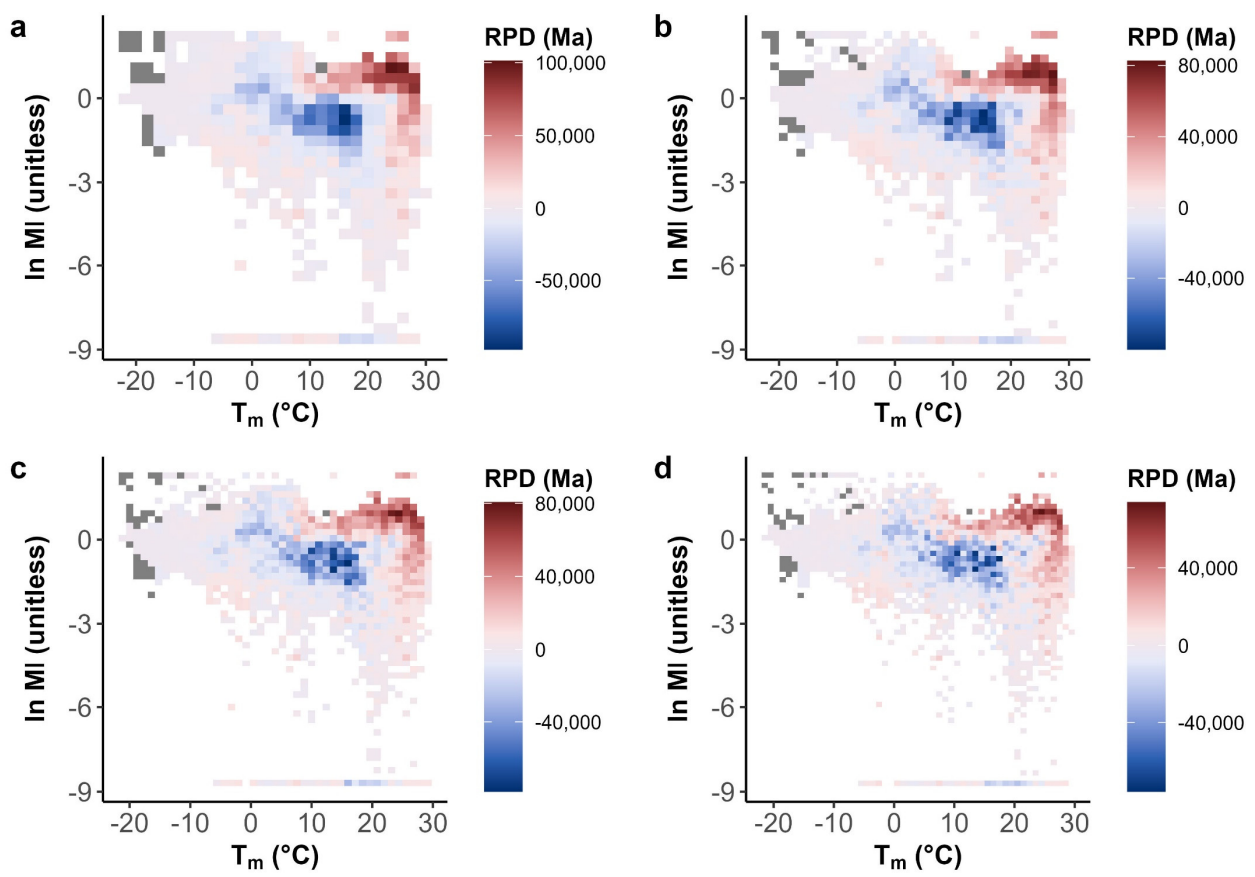

62  
63 Relative phylogenetic diversity (calculated as the residuals from regressing phylogenetic diversity  
64 against species richness, Ma) is shown per grid cell in climatic space defined by recent climatic  
65 conditions ( $T_m$  and  $\ln MI$ ), at four resolutions: 30 (a, 405 cells), 40 (b, 628 cells), 50 (c, 896 cells)  
66 and 60 (d, 1182 cells) equal intervals along each axis. Each grid cell ('climatic bin') represents a  
67 distinct climatic condition; colours indicate species richness.  $T_m$  (°C), recent (1901–1989)  
68 temperature index;  $\ln MI$  (unitless), recent natural-log-transformed moisture index.

69 **Fig. S8: Global distribution of bioclimatic variables in the selected geological periods at a 1°**  
70 **spatial resolution.**

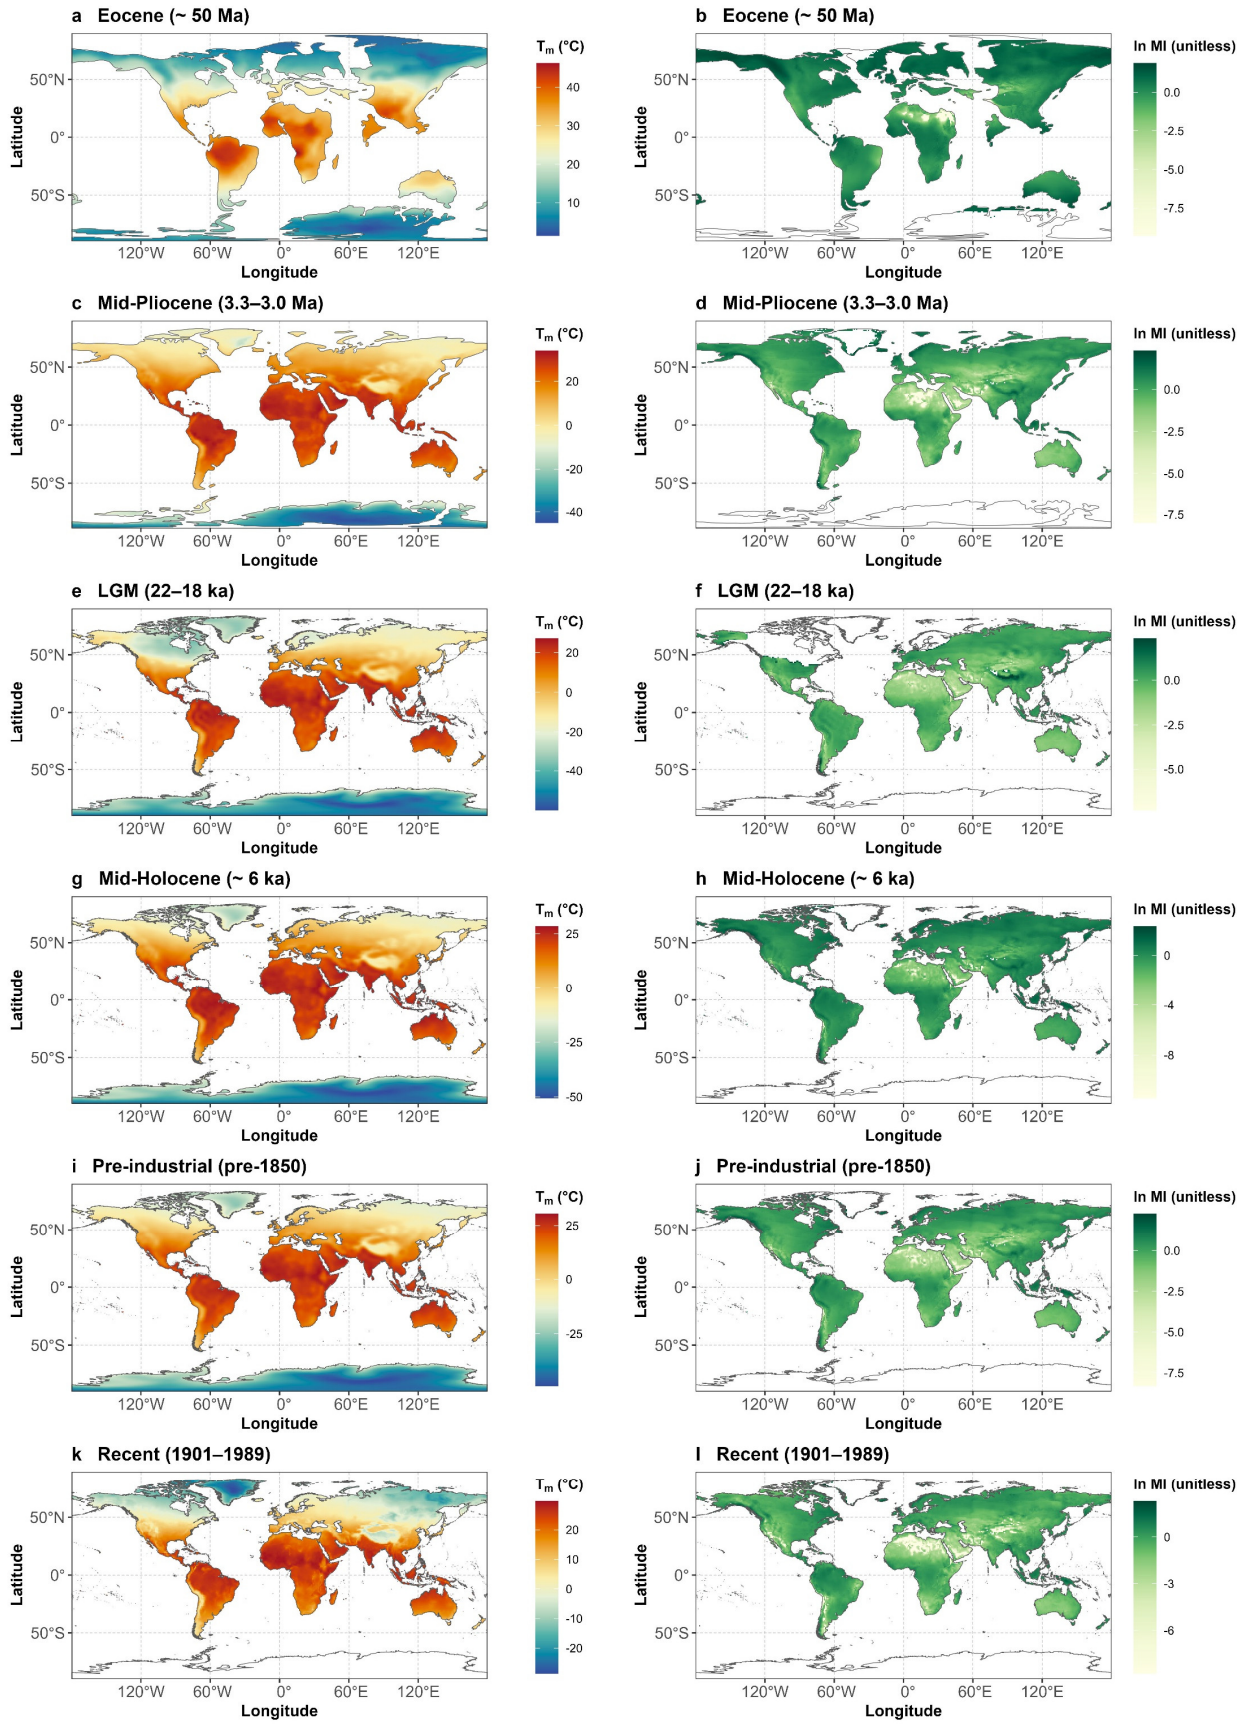



72 Gridded global distribution of: **a**, temperature index ( $T_m$ , °C) and **b**, natural-log-transformed moisture  
73 index ( $\ln MI$ , unitless) of the Eocene (*ca.* 50 Ma); **c**,  $T_m$  and **d**,  $\ln MI$  of the Mid-Pliocene (3.3–3.0  
74 Ma); **e**,  $T_m$  and **f**,  $\ln MI$  of the Last Glacial Maximum (LGM, 22–18 ka); **g**,  $T_m$  and **h**,  $\ln MI$  of the  
75 Mid-Holocene (*ca.* 6 ka); **i**,  $T_m$  and **j**,  $\ln MI$  of the pre-industrial period (pre-1850); **k**,  $T_m$  and **l**,  $\ln MI$  of  
76 the recent period (1901–1989).

77 **Fig. S9: Geographic extent of climate across geological periods.**

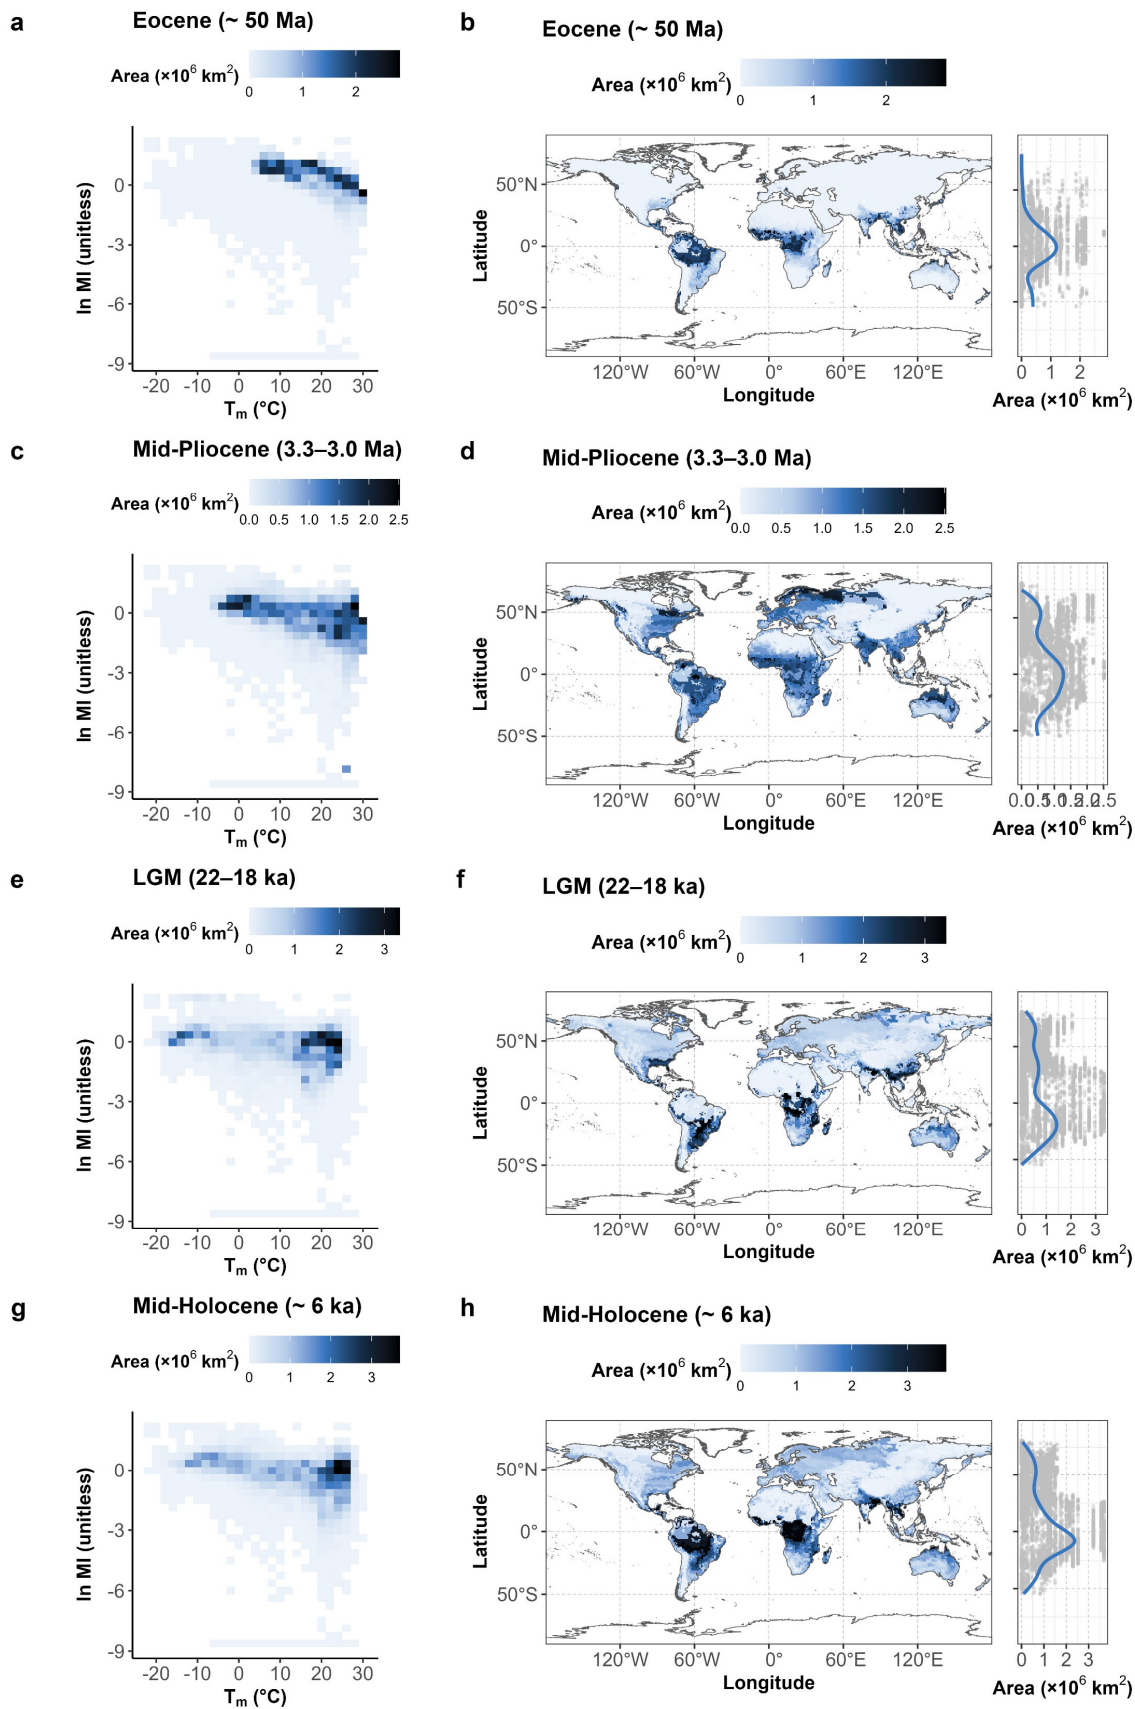

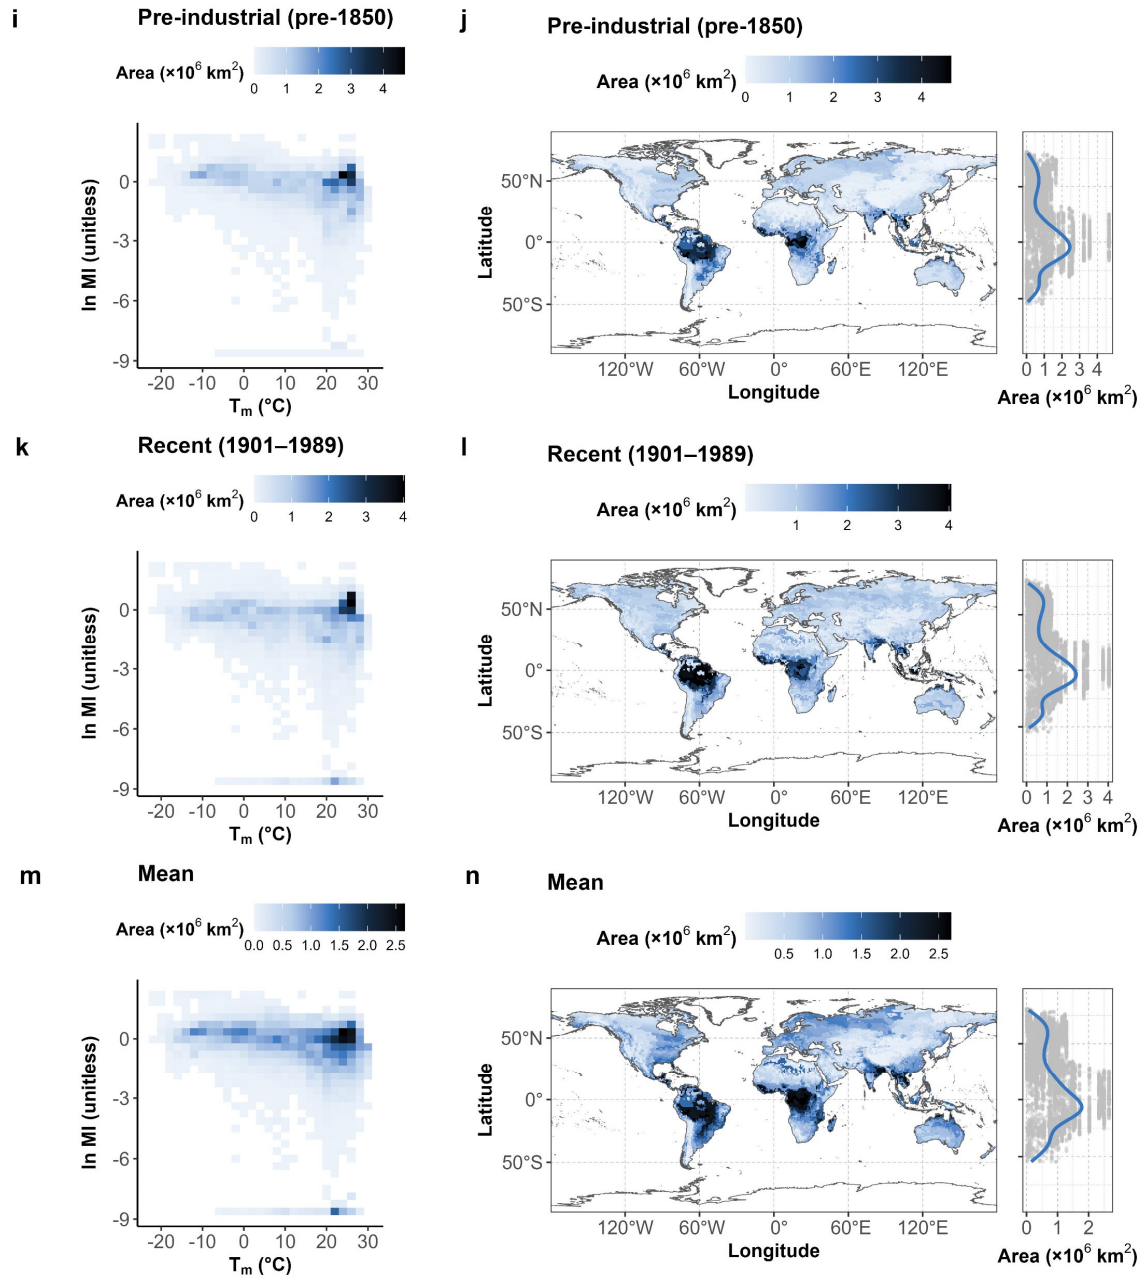

79

80 **a, c, e, g, i, k and m**, Patterns of the geographic extent of climate in climatic space across different  
81 geological periods. The geographic extent of climate is calculated as the total land surface area  
82 occupied by each climatic condition during the corresponding climatic period, referred to as 'Area'  
83 (km $^2$ ). Climatic space is defined by the recent (1901–1989) climatic conditions ( $T_m$  and In MI),  
84 partitioned into 30 equal intervals along each axis. **b, d, f, h, j, l and n**, Global patterns and  
85 latitudinal distributions of Area in recent geographic space at a 1° spatial resolution. **a and b**,  
86 Eocene (ca. 50 Ma); **c and d**, Mid-Pliocene (3.3–3.0 Ma); **e and f**, Last Glacial Maximum (LGM, 22–  
87 18 ka); **g and h**, Mid-Holocene (ca. 6 ka); **i and j**, pre-industrial period (pre-1850); **k and l**, recent

88 period (1901–1989); **m** and **n**, mean Area since the first appearance of each climatic condition  
89 across all selected climatic periods.  $T_m$  (°C), recent (1901–1989) temperature index;  $\ln MI$  (unitless),  
90 recent natural-log-transformed moisture index.

91 **Fig. S10: Changes in the geographic extent of recent climatic conditions from geohistorical**  
92 **periods to the recent period.**

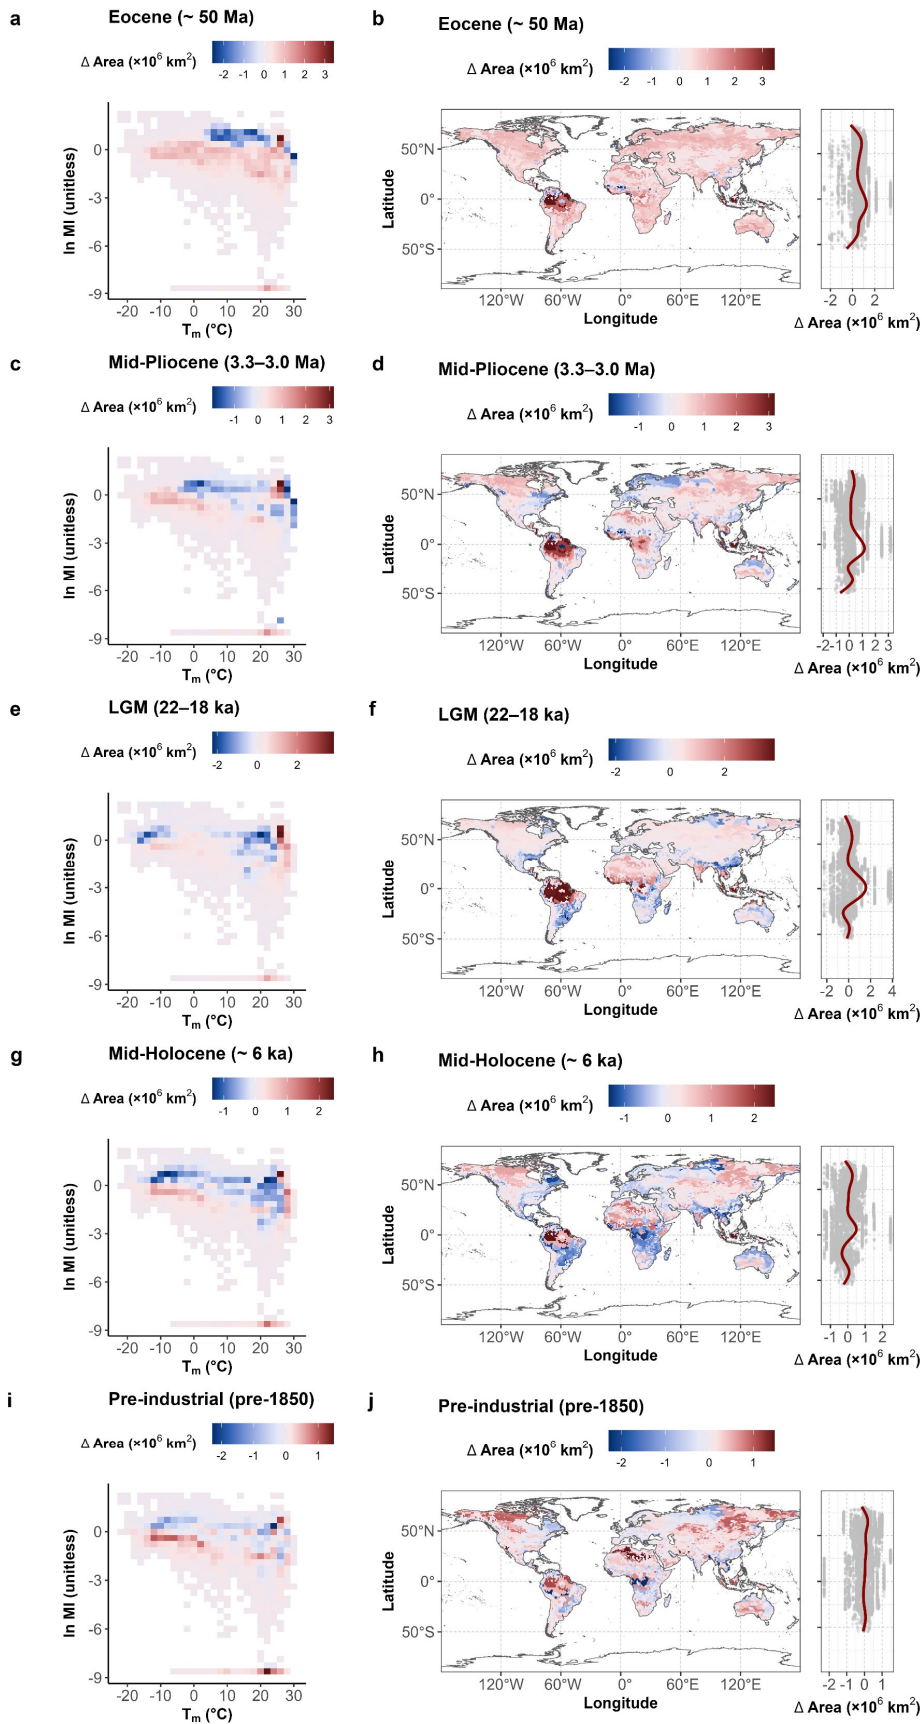

94 **a, c, e, g** and **i**, Change in total land area occupied by each climatic condition from its earliest  
95 occurrence to the recent period (referred to as  $\Delta\text{Area}$ ,  $\text{km}^2$ ) in climatic space. Climatic space is  
96 defined by the recent (1901–1989) climatic conditions ( $T_m$  and  $\ln \text{MI}$ ), partitioned into 30 equal  
97 intervals along each axis. **b, d, f, h** and **j**, Global patterns and latitudinal distributions of  $\Delta\text{Area}$  in  
98 recent geographic space at a  $1^\circ$  spatial resolution. **a** and **b**, Eocene (*ca.* 50 Ma); **c** and **d**,  
99 Mid-Pliocene (3.3–3.0 Ma); **e** and **f**, Last Glacial Maximum (LGM, 22–18 ka); **g** and **h**,  
100 Mid-Holocene (*ca.* 6 ka); **i** and **j**, pre-industrial period (pre-1850).  $T_m$  ( $^\circ\text{C}$ ), recent (1901–1989)  
101 temperature index;  $\ln \text{MI}$  (unitless), recent natural-log-transformed moisture index.

102 **Fig. S11: Geographic shift of recent climatic conditions from geohistorical periods to the**  
103 **recent period.**

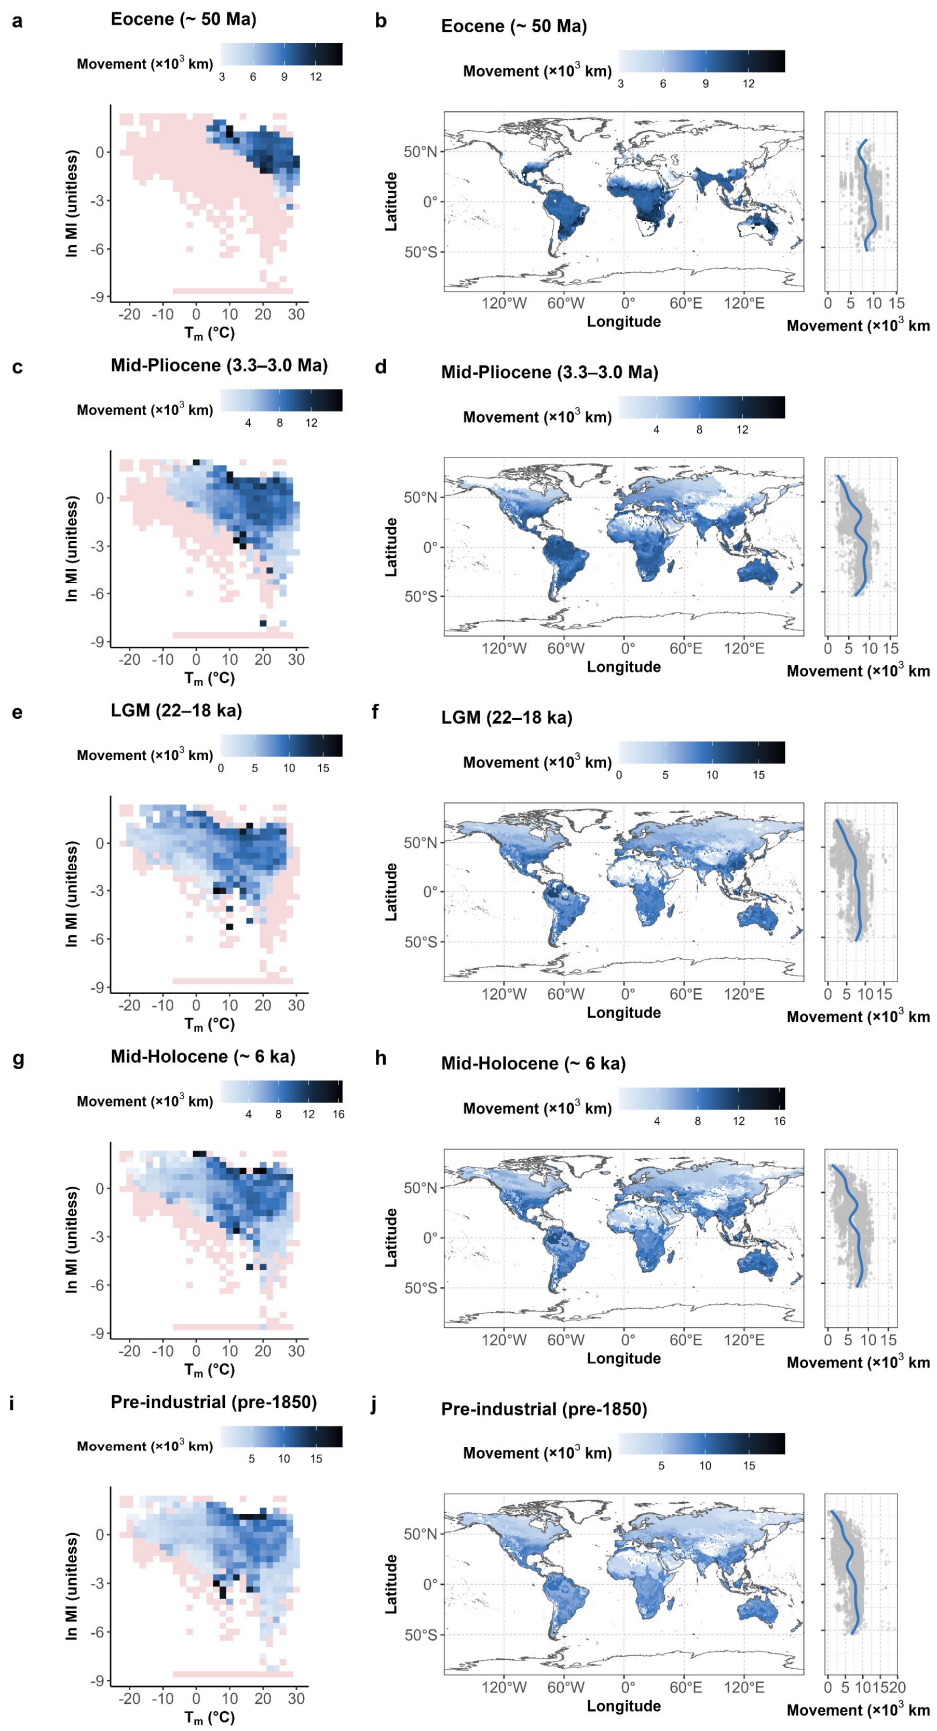



105 **a, c, e, g** and **i**, Geographic shift of a climatic condition since its earliest occurrence to the recent  
106 period (Movement, km) in climatic space. Climatic space is defined by the recent (1901–1989)  
107 climatic conditions ( $T_m$  and  $\ln MI$ ), partitioned into 30 equal intervals along each axis. The blue  
108 colour gradient indicates climatic conditions shared by a geohistorical period and the recent period,  
109 while the pink background highlights climatic conditions present in the recent period but absent in  
110 the geohistorical period. **b, d, f, h** and **j**, Global patterns and latitudinal distribution of Movement in  
111 recent geographic space at a  $1^\circ$  spatial resolution. **a** and **b**, Eocene (ca. 50 Ma); **c** and **d**,  
112 Mid-Pliocene (3.3–3.0 Ma); **e** and **f**, Last Glacial Maximum (LGM, 22–18 ka); **g** and **h**,  
113 Mid-Holocene (ca. 6 ka); **i** and **j**, pre-industrial period (pre-1850).  $T_m$  ( $^\circ\text{C}$ ), recent (1901–1989)  
114 temperature index;  $\ln MI$  (unitless), recent natural-log-transformed moisture index.

115 **Fig. S12: Pairwise correlation among explanatory variables.**

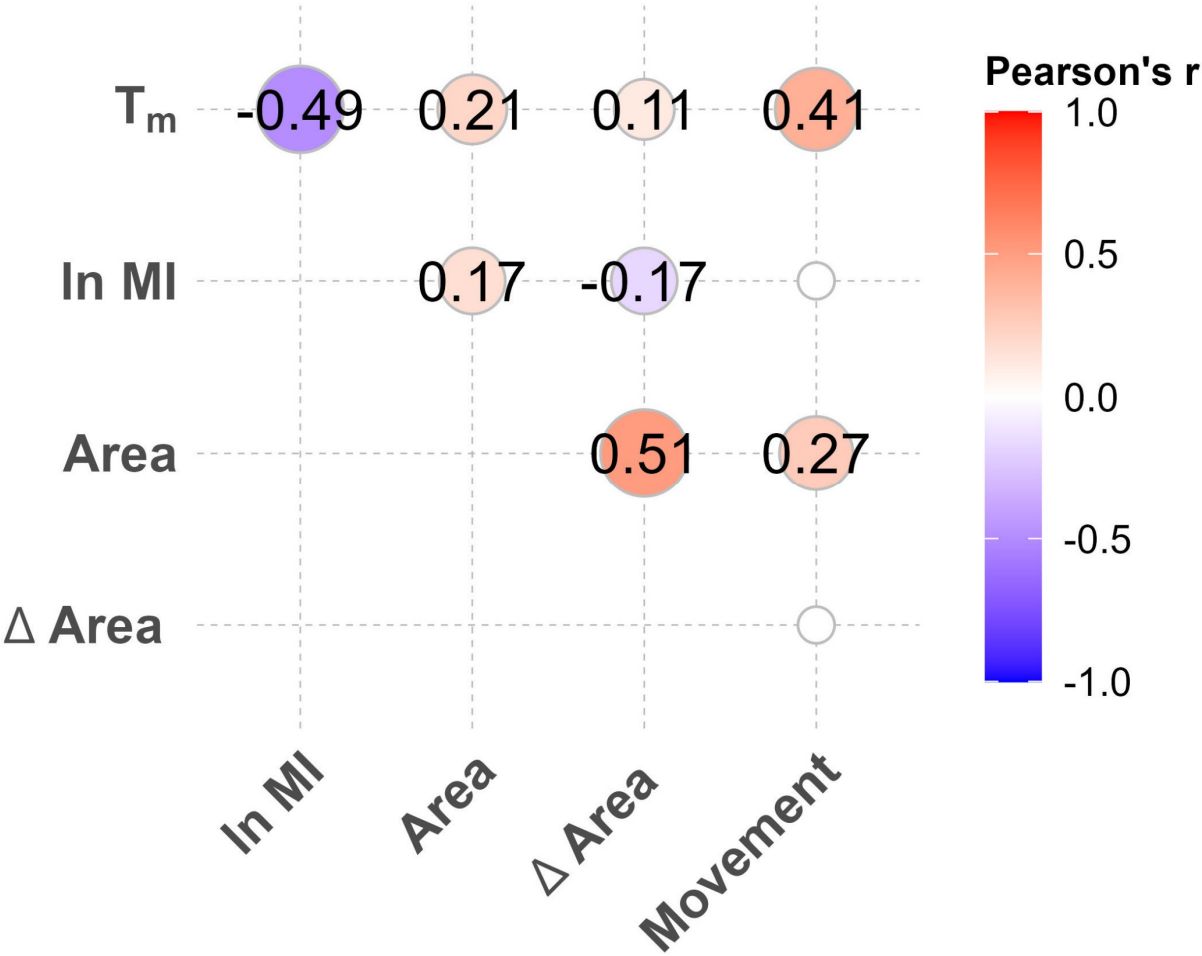

116

117 Pairwise Pearson's correlation coefficients among all explanatory variables. The absolute values of  
118 all coefficients are below or around 0.5, indicating a low risk of concurvity or collinearity.  $T_m$  ( $^{\circ}\text{C}$ ),  
119 recent (1901–1989) temperature index;  $\ln MI$  (unitless), recent natural-log-transformed moisture  
120 index; Area ( $\text{km}^2$ ), total land area occupied by a climatic condition in the recent period;  $\Delta Area$  ( $\text{km}^2$ ),  
121 change in total land area occupied by a climatic condition from its earliest occurrence to the recent  
122 period; Movement (km), geographic shift of a climatic condition since its earliest occurrence to the  
123 recent period.

124 **SI 2 Supplementary Tables**

125 **Table S1 | Comparison with previous global plant diversity products.** Summary of data sources <sup>a</sup>, methods for generating global plant diversity  
126 maps <sup>b</sup>, the number of species included <sup>c</sup>, and the spatial resolution of each map <sup>d</sup>.

| Data source <sup>a</sup>                    | Type <sup>b</sup>          | Number of species <sup>c</sup>                                                                     | Spatial Resolution <sup>d</sup>                                                                                                                        |
|---------------------------------------------|----------------------------|----------------------------------------------------------------------------------------------------|--------------------------------------------------------------------------------------------------------------------------------------------------------|
| Our research                                | Data-based                 | 350,864                                                                                            | Any resolution (using 1° as an example)                                                                                                                |
| Barthlott <i>et al.</i> (2005) <sup>3</sup> | Data-based                 | > 3,300 from different regions                                                                     | 10,000 km <sup>2</sup>                                                                                                                                 |
| Kier <i>et al.</i> (2005) <sup>4</sup>      | Data-based                 | Not available – estimated for each selected geographical unit                                      | 867 Terrestrial ecoregions of the world                                                                                                                |
| Kreft & Jetz (2007) <sup>5</sup>            | Model-based                | > 3,300 from 1,032 geographic units                                                                | 110 × 110 km (ca. 1°)                                                                                                                                  |
| Brummitt <i>et al.</i> (2021) <sup>6</sup>  | Data-based and Model-based | Not available – estimated for each selected geographical unit (data-based);<br>1,250 (model-based) | Level 3 geo-political regions of the world and 867 ecoregions of WWF (data-based),<br>10 km <sup>2</sup> (model-based)                                 |
| Sabatini <i>et al.</i> (2022) <sup>7</sup>  | Model-based                | 53,271                                                                                             | 400 m <sup>2</sup> , 1,000 m <sup>2</sup> and 1 ha for forests, and<br>10 m <sup>2</sup> , 100 m <sup>2</sup> and 1,000 m <sup>2</sup> for non-forests |
| Cai <i>et al.</i> (2023) <sup>1</sup>       | Model-based                | 298,087                                                                                            | 7,774 km <sup>2</sup> , 23,322 km <sup>2</sup> , 69,967 km <sup>2</sup> , and<br>209,903 km <sup>2</sup>                                               |

|                                                              |          |                                                                                                                     |                                                                                |
|--------------------------------------------------------------|----------|---------------------------------------------------------------------------------------------------------------------|--------------------------------------------------------------------------------|
| World Checklist of Vascular Plants<br>(WCVF) <sup>8</sup>    | Database | 357,347 accepted species (Feb–June<br>2024)<br>Notice: > 340,000 species with distribution<br>information available | Level 3 of the Biodiversity Information<br>Standards (TDWG) geographical codes |
| Global Inventory of Floras and Traits<br>(GIFT) <sup>9</sup> | Database | 303,713 vascular plants (v.3.1)<br>Notice: distribution data for some species<br>are not available                  | 3,627 geographic regions                                                       |

128 **Table S2 | Climate data used for this study.** Databases and model simulations used to extract each climatic variable in different geological periods.

| Project                                                                     | Version        | Experiment | Geological<br>period  | Model                    | Simulation                                   | Ensemble | Variable                                                                                                  | Resolution    | Reference         |
|-----------------------------------------------------------------------------|----------------|------------|-----------------------|--------------------------|----------------------------------------------|----------|-----------------------------------------------------------------------------------------------------------|---------------|-------------------|
| Deep-Time<br>Model<br>Intercomparison<br>Project<br>(DeepMIP) <sup>10</sup> | version<br>1.0 | Eocene     | Eocene<br>(ca. 50 Ma) | CESM1.2-CAM5             | × 6 CO <sub>2</sub>                          | r1i1p1f1 | elevation/surface altitude,<br>precipitation, surface downwelling<br>shortwave radiation, air temperature | 2.5° × 1.9°   | Ref <sup>11</sup> |
|                                                                             |                |            |                       | COSMOS-landv<br>eg-r2413 | × 4 CO <sub>2</sub>                          |          | elevation/surface altitude,<br>precipitation, surface downwelling<br>shortwave radiation, air temperature | 3.75° × 3.71° | Ref <sup>12</sup> |
|                                                                             |                |            |                       | GFDL-CM2.1               | × 4 CO <sub>2</sub> , × 6<br>CO <sub>2</sub> |          | elevation/surface altitude,<br>precipitation, surface downwelling<br>shortwave radiation, air temperature | 3.75° × 3.02° | Ref <sup>13</sup> |
|                                                                             |                |            |                       | INM-CM4-8                | × 6 CO <sub>2</sub>                          |          | elevation/surface altitude,<br>precipitation, surface downwelling<br>shortwave radiation, air temperature | 2.0° × 1.5°   | Ref <sup>12</sup> |
|                                                                             |                |            |                       | NorESM1-F                | × 4 CO <sub>2</sub>                          |          | elevation/surface altitude,<br>precipitation, surface downwelling<br>shortwave radiation, air temperature | 2.5° × 1.9°   | Ref <sup>14</sup> |
|                                                                             |                |            |                       |                          |                                              |          |                                                                                                           |               |                   |

|                                                                                        |                        |                            |                                               |                     |                    |                                                                                                           |                    |                       |
|----------------------------------------------------------------------------------------|------------------------|----------------------------|-----------------------------------------------|---------------------|--------------------|-----------------------------------------------------------------------------------------------------------|--------------------|-----------------------|
| Paleoclimat<br><br>Modeling<br><br>Intercomparison<br><br>Project (PMIP) <sup>15</sup> | Phase 4<br><br>(PMIP4) | midPliocene-<br><br>eoi400 | Mid-Pliocene<br><br>(3.3–3.0 Ma)              | CESM2               | --<br><br>r1i1p1f1 | elevation/surface altitude,<br>precipitation, surface downwelling<br>shortwave radiation, air temperature | 100 km ×<br>100 km | Ref <sup>16</sup>     |
|                                                                                        |                        |                            |                                               | GISS-E2-1-G         |                    | precipitation, surface downwelling<br>shortwave radiation, air temperature                                | 250 km ×<br>250 km | Refs <sup>17,18</sup> |
|                                                                                        |                        |                            |                                               | HadGEM3-GC3<br>1-LL |                    | precipitation, air temperature                                                                            | 250 km ×<br>250 km | Ref <sup>19</sup>     |
|                                                                                        |                        | lgm                        | Last Glacial<br>Maximum<br>(LGM, 22–18<br>ka) | NorESM1-F           |                    | elevation/surface altitude,<br>precipitation, surface downwelling<br>shortwave radiation, air temperature | 250 km ×<br>250 km | Ref <sup>14</sup>     |
|                                                                                        |                        |                            |                                               | AWI-ESM-1-1-L<br>R  |                    | elevation/surface altitude,<br>precipitation, surface downwelling<br>shortwave radiation, air temperature | 250 km ×<br>250 km | Ref <sup>20</sup>     |
|                                                                                        |                        |                            |                                               | MPI-ESM1-2-LR       |                    | elevation/surface altitude,<br>precipitation, surface downwelling<br>shortwave radiation, air temperature | 250 km ×<br>250 km | Ref <sup>21</sup>     |
|                                                                                        |                        |                            |                                               | AWI-ESM-1-1-L<br>R  |                    | elevation/surface altitude,<br>precipitation, surface downwelling                                         | 250 km ×<br>250 km | Ref <sup>20</sup>     |
|                                                                                        |                        |                            |                                               |                     |                    |                                                                                                           |                    |                       |
|                                                                                        |                        |                            |                                               |                     |                    |                                                                                                           |                    |                       |
|                                                                                        |                        |                            |                                               |                     |                    |                                                                                                           |                    |                       |
|                                                                                        |                        |                            |                                               |                     |                    |                                                                                                           |                    |                       |
|                                                                                        |                        |                            |                                               |                     |                    |                                                                                                           |                    |                       |

|                 |         |           |                    |            |               |          |                                      |          |                   |
|-----------------|---------|-----------|--------------------|------------|---------------|----------|--------------------------------------|----------|-------------------|
|                 |         |           |                    |            |               |          | shortwave radiation, air temperature |          |                   |
|                 |         |           |                    |            |               |          | elevation/surface altitude,          | 100 km × | Ref <sup>16</sup> |
|                 |         |           |                    |            | CESM2         |          | precipitation, surface downwelling   | 100 km   |                   |
|                 |         |           |                    |            |               |          | shortwave radiation, air temperature |          |                   |
|                 |         |           |                    |            |               |          | elevation/surface altitude,          | 250 km × | Ref <sup>21</sup> |
|                 |         |           |                    |            | MPI-ESM1-2-LR |          | precipitation, surface downwelling   | 250 km   |                   |
|                 |         |           |                    |            |               |          | shortwave radiation, air temperature |          |                   |
|                 |         |           |                    |            |               |          | elevation/surface altitude,          | 100 km × | Ref <sup>22</sup> |
|                 |         |           |                    |            | MRI-ESM2-0    |          | precipitation, surface downwelling   | 100 km   |                   |
|                 |         |           |                    |            |               |          | shortwave radiation, air temperature |          |                   |
|                 |         |           |                    |            |               |          | precipitation, surface downwelling   | 250 km × | Ref <sup>23</sup> |
|                 |         |           |                    |            | NESM3         |          | shortwave radiation, air temperature | 250 km   |                   |
|                 |         |           |                    |            |               |          |                                      |          |                   |
|                 |         |           |                    |            |               |          | surface downwelling shortwave        | 250 km × | Ref <sup>14</sup> |
|                 |         |           |                    |            | NorESM1-F     |          | radiation                            | 250 km   |                   |
|                 |         |           |                    |            |               |          |                                      |          |                   |
|                 |         |           |                    |            |               |          | elevation/surface altitude,          | 250 km × | Ref <sup>24</sup> |
|                 |         |           |                    |            | NorESM2-LM    |          | precipitation, air temperature       | 250 km   |                   |
|                 |         |           |                    |            |               |          |                                      |          |                   |
| Coupled Model   | Phase 6 | piControl | Pre-industrial era | ACCESS-CM2 | --            | r1i1p1f1 | elevation/surface altitude,          | 250 km × | Ref <sup>26</sup> |
| Intercomparison | (CMIP6) |           |                    |            |               |          | precipitation, surface downwelling   | 250 km   |                   |



|                                 |               |               |                                                                                                           |                    |                   |
|---------------------------------|---------------|---------------|-----------------------------------------------------------------------------------------------------------|--------------------|-------------------|
| Project<br>(CMIP) <sup>25</sup> | (before 1850) |               | shortwave radiation, air temperature                                                                      |                    |                   |
|                                 |               | CESM2         | elevation/surface altitude,<br>precipitation, surface downwelling<br>shortwave radiation, air temperature | 100 km ×<br>100 km | Ref <sup>16</sup> |
|                                 |               | MIROC6        | elevation/surface altitude,<br>precipitation, surface downwelling<br>shortwave radiation, air temperature | 250 km ×<br>250 km | Ref <sup>27</sup> |
|                                 |               | MPI-ESM1-2-LR | elevation/surface altitude,<br>precipitation, surface downwelling<br>shortwave radiation, air temperature | 250 km ×<br>250 km | Ref <sup>21</sup> |
|                                 |               | MRI-ESM2-0    | elevation/surface altitude,<br>precipitation, surface downwelling<br>shortwave radiation, air temperature | 100 km ×<br>100 km | Ref <sup>22</sup> |
|                                 |               | NESM3         | precipitation, surface downwelling<br>shortwave radiation, air temperature                                | 250 km ×<br>250 km | Ref <sup>23</sup> |
|                                 |               | NorESM2-LM    | elevation/surface altitude,<br>precipitation, surface downwelling<br>shortwave radiation, air temperature | 250 km ×<br>250 km | Ref <sup>24</sup> |

|               |                              |    |               |                 |    |    |                                         |                 |                   |
|---------------|------------------------------|----|---------------|-----------------|----|----|-----------------------------------------|-----------------|-------------------|
|               |                              |    |               | ACCESS-CM2      |    |    | surface downwelling shortwave radiation | 250 km × 250 km | Ref <sup>26</sup> |
|               |                              |    |               | CESM2           |    |    | surface downwelling shortwave radiation | 100 km × 100 km | Ref <sup>16</sup> |
|               |                              |    |               | MIROC6          |    |    | surface downwelling shortwave radiation | 250 km × 250 km | Ref <sup>27</sup> |
| historical    | Recent period<br>(1901–1989) |    |               | MPI-ESM1-2-LR   |    |    | surface downwelling shortwave radiation | 250 km × 250 km | Ref <sup>21</sup> |
|               |                              |    |               | MRI-ESM2-0      |    |    | surface downwelling shortwave radiation | 100 km × 100 km | Ref <sup>22</sup> |
|               |                              |    |               | NESM3           |    |    | surface downwelling shortwave radiation | 250 km × 250 km | Ref <sup>23</sup> |
|               |                              |    |               | NorESM2-LM      |    |    | surface downwelling shortwave radiation | 250 km × 250 km | Ref <sup>24</sup> |
|               |                              |    |               |                 |    |    |                                         |                 |                   |
|               |                              |    |               |                 |    |    |                                         |                 |                   |
| Climatic      |                              |    |               | Observation-bas |    |    |                                         |                 |                   |
| Research Unit | version                      | -- | Recent period | ed gridded      | -- | -- | precipitation, air temperature          | 0.5° × 0.5°     | Ref <sup>28</sup> |
| (CRU)         | 4.09                         |    | (1901–1989)   | dataset         |    |    |                                         |                 |                   |
| Time-Series   |                              |    |               |                 |    |    |                                         |                 |                   |

|                         |         |                            |            |                   |
|-------------------------|---------|----------------------------|------------|-------------------|
| (TS) <sup>28</sup>      |         |                            |            |                   |
|                         |         |                            |            |                   |
| WorldClim <sup>29</sup> | version |                            |            | 30                |
|                         | 2.1     | elevation/surface altitude | arc-second | Ref <sup>29</sup> |
|                         |         | grid                       |            |                   |

130 **Table S3 | Summary of Generalised Additive Models (GAMs) incorporating bioclimatic**  
 131 **variables and the geographic extent of climate during the Eocene (ca. 50 Ma) across multiple**  
 132 **climatic space resolutions.** Summary statistics of GAMs fitted with species richness as the  
 133 response variable. Explanatory variables include recent (1901–1989) temperature index ( $T_m$ , °C)  
 134 and natural-log-transformed moisture index (ln MI, unitless), and total land area occupied by each  
 135 climatic condition (Area, km<sup>2</sup>) during the Eocene. Different GAMs were constructed based on  
 136 climatic spaces defined by the recent climatic conditions ( $T_m$  and ln MI) at four resolutions, with  
 137 each climatic axis divided into 30, 40, 50 or 60 equal intervals. Reported metrics for each model  
 138 include concurvity,  $\chi^2$  and  $p$ -value for each explanatory variable, and explained deviance (Deviance),  
 139 predicted  $R^2$  ( $R_{pred}^2$ ) and adjusted  $R^2$  ( $R_{adj}^2$ ) of each GAM model, and the sample size (N) fitted into  
 140 each model.

| 30 equal interval resolution |            |            |            |          |              |             |     |
|------------------------------|------------|------------|------------|----------|--------------|-------------|-----|
| Predictor                    | Concurvity | $\chi^2$   | $p$ -value | Deviance | $R_{pred}^2$ | $R_{adj}^2$ | N   |
| $T_m$                        | 0.43       | 1826164.57 | < 0.001    |          |              |             |     |
| ln MI                        | 0.29       | 2621414.09 | < 0.001    | 0.92     | 0.91         | 0.90        | 405 |
| Area                         | 0.28       | 110054.76  | < 0.001    |          |              |             |     |
| 40 equal interval resolution |            |            |            |          |              |             |     |
| Predictor                    | Concurvity | $\chi^2$   | $p$ -value | Deviance | $R_{pred}^2$ | $R_{adj}^2$ | N   |
| $T_m$                        | 0.42       | 2528553.22 | < 0.001    |          |              |             |     |
| ln MI                        | 0.26       | 3152404.27 | < 0.001    | 0.89     | 0.88         | 0.87        | 628 |
| Area                         | 0.26       | 153392.87  | < 0.001    |          |              |             |     |
| 50 equal interval resolution |            |            |            |          |              |             |     |
| Predictor                    | Concurvity | $\chi^2$   | $p$ -value | Deviance | $R_{pred}^2$ | $R_{adj}^2$ | N   |
| $T_m$                        | 0.40       | 2905884.78 | < 0.001    |          |              |             |     |
| ln MI                        | 0.24       | 3663735.85 | < 0.001    | 0.87     | 0.84         | 0.84        | 896 |
| Area                         | 0.23       | 194660.03  | < 0.001    |          |              |             |     |
| 60 equal interval resolution |            |            |            |          |              |             |     |

| Predictor | Concurvity | $\chi^2$   | $p$ -value | Deviance | $R_{\text{pred}}^2$ | $R_{\text{adj}}^2$ | N    |
|-----------|------------|------------|------------|----------|---------------------|--------------------|------|
| $T_m$     | 0.42       | 3391694.10 | < 0.001    |          |                     |                    |      |
| ln MI     | 0.23       | 3897622.26 | < 0.001    | 0.84     | 0.80                | 0.79               | 1182 |
| Area      | 0.21       | 159522.60  | < 0.001    |          |                     |                    |      |

141 **Table S4 | Summary of Generalised Additive Models (GAMs) incorporating bioclimatic**  
 142 **variables and the geographic extent of climate during the Mid-Pliocene (3.3–3.0 Ma) across**  
 143 **multiple climatic space resolutions.** Summary statistics of GAMs fitted with species richness as  
 144 the response variable. Explanatory variables include recent (1901–1989) temperature index ( $T_m$ , °C)  
 145 and natural-log-transformed moisture index (ln MI, unitless), and total land area occupied by each  
 146 climatic condition (Area, km<sup>2</sup>) during the Mid-Pliocene. Different GAMs were constructed based on  
 147 climatic spaces defined by the recent climatic conditions ( $T_m$  and ln MI) at four resolutions, with  
 148 each climatic axis divided into 30, 40, 50 or 60 equal intervals. Reported metrics for each model  
 149 include concurvity,  $\chi^2$  and  $p$ -value for each explanatory variable, and explained deviance (Deviance),  
 150 predicted  $R^2$  ( $R_{\text{pred}}^2$ ) and adjusted  $R^2$  ( $R_{\text{adj}}^2$ ) of each GAM model, and the sample size (N) fitted into  
 151 each model.

| 30 equal interval resolution |            |            |            |          |                     |                    |     |
|------------------------------|------------|------------|------------|----------|---------------------|--------------------|-----|
| Predictor                    | Concurvity | $\chi^2$   | $p$ -value | Deviance | $R_{\text{pred}}^2$ | $R_{\text{adj}}^2$ | N   |
| $T_m$                        | 0.61       | 1326565.81 | < 0.001    |          |                     |                    |     |
| ln MI                        | 0.41       | 1110697.66 | < 0.001    | 0.91     | 0.89                | 0.89               | 405 |
| Area                         | 0.42       | 70793.87   | < 0.001    |          |                     |                    |     |
| 40 equal interval resolution |            |            |            |          |                     |                    |     |
| Predictor                    | Concurvity | $\chi^2$   | $p$ -value | Deviance | $R_{\text{pred}}^2$ | $R_{\text{adj}}^2$ | N   |
| $T_m$                        | 0.60       | 1742019.22 | < 0.001    |          |                     |                    |     |
| ln MI                        | 0.37       | 1494216.90 | < 0.001    | 0.89     | 0.85                | 0.85               | 628 |
| Area                         | 0.39       | 73973.80   | < 0.001    |          |                     |                    |     |
| 50 equal interval resolution |            |            |            |          |                     |                    |     |
| Predictor                    | Concurvity | $\chi^2$   | $p$ -value | Deviance | $R_{\text{pred}}^2$ | $R_{\text{adj}}^2$ | N   |

|                |      |            |         |      |      |      |     |
|----------------|------|------------|---------|------|------|------|-----|
| T <sub>m</sub> | 0.56 | 2276038.16 | < 0.001 |      |      |      |     |
| ln MI          | 0.35 | 2033348.82 | < 0.001 | 0.86 | 0.82 | 0.81 | 896 |
| Area           | 0.31 | 89872.99   | < 0.001 |      |      |      |     |

#### 60 equal interval resolution

| Predictor      | Concurvity | $\chi^2$   | <i>p</i> -value | Deviance | R <sub>pred</sub> <sup>2</sup> | R <sub>adj</sub> <sup>2</sup> | N    |
|----------------|------------|------------|-----------------|----------|--------------------------------|-------------------------------|------|
| T <sub>m</sub> | 0.59       | 2722005.60 | < 0.001         |          |                                |                               |      |
| ln MI          | 0.33       | 2466028.68 | < 0.001         | 0.83     | 0.78                           | 0.78                          | 1182 |
| Area           | 0.32       | 92430.90   | < 0.001         |          |                                |                               |      |

152 **Table S5 | Summary of Generalised Additive Models (GAMs) incorporating bioclimatic**  
 153 **variables and the geographic extent of climate during the Last Glacial Maximum (LGM, 22–18**  
 154 **ka) across multiple climatic space resolutions.** Summary statistics of GAMs fitted with species  
 155 richness as the response variable. Explanatory variables include recent (1901–1989) temperature  
 156 index (T<sub>m</sub>, °C) and natural-log-transformed moisture index (ln MI, unitless), and total land area  
 157 occupied by each climatic condition (Area, km<sup>2</sup>) during the LGM. Different GAMs were constructed  
 158 based on climatic spaces defined by the recent climatic conditions (T<sub>m</sub> and ln MI) at four resolutions,  
 159 with each climatic axis divided into 30, 40, 50 or 60 equal intervals. Reported metrics for each  
 160 model include concurvity,  $\chi^2$  and *p*-value for each explanatory variable, and explained deviance  
 161 (Deviance), predicted R<sup>2</sup> (R<sub>pred</sub><sup>2</sup>) and adjusted R<sup>2</sup> (R<sub>adj</sub><sup>2</sup>) of each GAM model, and the sample size  
 162 (N) fitted into each model.

#### 30 equal interval resolution

| Predictor      | Concurvity | $\chi^2$   | <i>p</i> -value | Deviance | R <sub>pred</sub> <sup>2</sup> | R <sub>adj</sub> <sup>2</sup> | N   |
|----------------|------------|------------|-----------------|----------|--------------------------------|-------------------------------|-----|
| T <sub>m</sub> | 0.25       | 1464573.86 | < 0.001         |          |                                |                               |     |
| ln MI          | 0.32       | 701089.22  | < 0.001         | 0.91     | 0.89                           | 0.88                          | 405 |
| Area           | 0.29       | 43087.69   | < 0.001         |          |                                |                               |     |

#### 40 equal interval resolution

| Predictor      | Concurvity | $\chi^2$   | <i>p</i> -value | Deviance | R <sub>pred</sub> <sup>2</sup> | R <sub>adj</sub> <sup>2</sup> | N   |
|----------------|------------|------------|-----------------|----------|--------------------------------|-------------------------------|-----|
| T <sub>m</sub> | 0.25       | 2092171.65 | < 0.001         | 0.88     | 0.85                           | 0.84                          | 628 |

|       |      |            |         |
|-------|------|------------|---------|
| In MI | 0.28 | 1260857.35 | < 0.001 |
| Area  | 0.29 | 26796.12   | < 0.001 |

#### 50 equal interval resolution

| Predictor | Concurvity | $\chi^2$   | <i>p</i> -value | Deviance | $R_{\text{pred}}^2$ | $R_{\text{adj}}^2$ | N   |
|-----------|------------|------------|-----------------|----------|---------------------|--------------------|-----|
| $T_m$     | 0.26       | 2525533.82 | < 0.001         |          |                     |                    |     |
| In MI     | 0.25       | 1610612.17 | < 0.001         | 0.85     | 0.81                | 0.80               | 896 |
| Area      | 0.26       | 20900.22   | < 0.001         |          |                     |                    |     |

#### 60 equal interval resolution

| Predictor | Concurvity | $\chi^2$   | <i>p</i> -value | Deviance | $R_{\text{pred}}^2$ | $R_{\text{adj}}^2$ | N    |
|-----------|------------|------------|-----------------|----------|---------------------|--------------------|------|
| $T_m$     | 0.25       | 3001882.59 | < 0.001         |          |                     |                    |      |
| In MI     | 0.24       | 1830820.53 | < 0.001         | 0.83     | 0.78                | 0.77               | 1182 |
| Area      | 0.23       | 23292.10   | < 0.001         |          |                     |                    |      |

**Table S6 | Summary of Generalised Additive Models (GAMs) incorporating bioclimatic variables and the geographic extent of climate during the Mid-Holocene (ca. 6 ka) across multiple climatic space resolutions.** Summary statistics of GAMs fitted with species richness as the response variable. Explanatory variables include recent (1901–1989) temperature index ( $T_m$ , °C) and natural-log-transformed moisture index (ln MI, unitless), and total land area occupied by each climatic condition (Area, km<sup>2</sup>) during the Mid-Holocene. Different GAMs were constructed based on climatic spaces defined by the recent climatic conditions ( $T_m$  and ln MI) at four resolutions, with each climatic axis divided into 30, 40, 50 or 60 equal intervals. Reported metrics for each model include concurvity,  $\chi^2$  and *p*-value for each explanatory variable, and explained deviance (Deviance), predicted  $R^2$  ( $R_{\text{pred}}^2$ ) and adjusted  $R^2$  ( $R_{\text{adj}}^2$ ) of each GAM model, and the sample size (N) fitted into each model.

#### 30 equal interval resolution

| Predictor | Concurvity | $\chi^2$   | <i>p</i> -value | Deviance | $R_{\text{pred}}^2$ | $R_{\text{adj}}^2$ | N   |
|-----------|------------|------------|-----------------|----------|---------------------|--------------------|-----|
| $T_m$     | 0.40       | 1149298.76 | < 0.001         |          |                     |                    |     |
| In MI     | 0.38       | 720379.97  | < 0.001         | 0.91     | 0.91                | 0.90               | 405 |



| Area                         | 0.28       | 91266.85   | < 0.001         |          |                     |                    |      |
|------------------------------|------------|------------|-----------------|----------|---------------------|--------------------|------|
| 40 equal interval resolution |            |            |                 |          |                     |                    |      |
| Predictor                    | Concurvity | $\chi^2$   | <i>p</i> -value | Deviance | $R_{\text{pred}}^2$ | $R_{\text{adj}}^2$ | N    |
| T <sub>m</sub>               | 0.39       | 1542196.05 | < 0.001         |          |                     |                    |      |
| ln MI                        | 0.35       | 996440.98  | < 0.001         | 0.88     | 0.85                | 0.84               | 628  |
| Area                         | 0.30       | 34971.45   | < 0.001         |          |                     |                    |      |
| 50 equal interval resolution |            |            |                 |          |                     |                    |      |
| Predictor                    | Concurvity | $\chi^2$   | <i>p</i> -value | Deviance | $R_{\text{pred}}^2$ | $R_{\text{adj}}^2$ | N    |
| T <sub>m</sub>               | 0.39       | 1855885.52 | < 0.001         |          |                     |                    |      |
| ln MI                        | 0.33       | 1321145.55 | < 0.001         | 0.86     | 0.82                | 0.81               | 896  |
| Area                         | 0.25       | 75771.48   | < 0.001         |          |                     |                    |      |
| 60 equal interval resolution |            |            |                 |          |                     |                    |      |
| Predictor                    | Concurvity | $\chi^2$   | <i>p</i> -value | Deviance | $R_{\text{pred}}^2$ | $R_{\text{adj}}^2$ | N    |
| T <sub>m</sub>               | 0.41       | 2161235.79 | < 0.001         |          |                     |                    |      |
| ln MI                        | 0.30       | 1553946.16 | < 0.001         | 0.83     | 0.78                | 0.78               | 1182 |
| Area                         | 0.23       | 46616.82   | < 0.001         |          |                     |                    |      |

174 **Table S7 | Summary of Generalised Additive Models (GAMs) incorporating bioclimatic**  
 175 **variables and the geographic extent of climate during the pre-industrial period (pre-1850)**  
 176 **across multiple climatic space resolutions.** Summary statistics of GAMs fitted with species  
 177 richness as the response variable. Explanatory variables include recent (1901–1989) temperature  
 178 index (T<sub>m</sub>, °C) and natural-log-transformed moisture index (ln MI, unitless), and total land area  
 179 occupied by each climatic condition (Area, km<sup>2</sup>) during the pre-industrial period. Different GAMs  
 180 were constructed based on climatic spaces defined by the recent climatic conditions (T<sub>m</sub> and ln MI)  
 181 at four resolutions, with each climatic axis divided into 30, 40, 50 or 60 equal intervals. Reported  
 182 metrics for each model include concurvity,  $\chi^2$  and *p*-value for each explanatory variable, and  
 183 explained deviance (Deviance), predicted R<sup>2</sup> ( $R_{\text{pred}}^2$ ) and adjusted R<sup>2</sup> ( $R_{\text{adj}}^2$ ) of each GAM model,  
 184 and the sample size (N) fitted into each model.

| 30 equal interval resolution |            |            |                 |          |                     |                    |      |
|------------------------------|------------|------------|-----------------|----------|---------------------|--------------------|------|
| Predictor                    | Concurvity | $\chi^2$   | <i>p</i> -value | Deviance | $R_{\text{pred}}^2$ | $R_{\text{adj}}^2$ | N    |
| $T_m$                        | 0.48       | 1240918.46 | < 0.001         |          |                     |                    |      |
| ln MI                        | 0.34       | 671161.66  | < 0.001         | 0.91     | 0.90                | 0.89               | 405  |
| Area                         | 0.27       | 88409.00   | < 0.001         |          |                     |                    |      |
| 40 equal interval resolution |            |            |                 |          |                     |                    |      |
| Predictor                    | Concurvity | $\chi^2$   | <i>p</i> -value | Deviance | $R_{\text{pred}}^2$ | $R_{\text{adj}}^2$ | N    |
| $T_m$                        | 0.48       | 1652612.87 | < 0.001         |          |                     |                    |      |
| ln MI                        | 0.33       | 971836.13  | < 0.001         | 0.89     | 0.87                | 0.87               | 628  |
| Area                         | 0.23       | 153045.85  | < 0.001         |          |                     |                    |      |
| 50 equal interval resolution |            |            |                 |          |                     |                    |      |
| Predictor                    | Concurvity | $\chi^2$   | <i>p</i> -value | Deviance | $R_{\text{pred}}^2$ | $R_{\text{adj}}^2$ | N    |
| $T_m$                        | 0.46       | 2047651.57 | < 0.001         |          |                     |                    |      |
| ln MI                        | 0.30       | 1270973.81 | < 0.001         | 0.87     | 0.83                | 0.83               | 896  |
| Area                         | 0.21       | 154572.78  | < 0.001         |          |                     |                    |      |
| 60 equal interval resolution |            |            |                 |          |                     |                    |      |
| Predictor                    | Concurvity | $\chi^2$   | <i>p</i> -value | Deviance | $R_{\text{pred}}^2$ | $R_{\text{adj}}^2$ | N    |
| $T_m$                        | 0.49       | 2470587.64 | < 0.001         |          |                     |                    |      |
| ln MI                        | 0.29       | 1595683.32 | < 0.001         | 0.84     | 0.79                | 0.78               | 1182 |
| Area                         | 0.22       | 124551.12  | < 0.001         |          |                     |                    |      |

185 **Table S8 | Summary of Generalised Additive Models (GAMs) incorporating bioclimatic**  
 186 **variables and the geographic extent of climate during the recent period (1901–1989) across**  
 187 **multiple climatic space resolutions.** Summary statistics of GAMs fitted with species richness as  
 188 the response variable. Explanatory variables include recent (1901–1989) temperature index ( $T_m$ , °C)  
 189 and natural-log-transformed moisture index (ln MI, unitless), and total land area occupied by each  
 190 climatic condition (Area, km<sup>2</sup>) during the recent period. Different GAMs were constructed based on  
 191 climatic spaces defined by the recent climatic conditions ( $T_m$  and ln MI) at four resolutions, with  
 192 each climatic axis divided into 30, 40, 50 or 60 equal intervals. Reported metrics for each model

193 include concurvity,  $\chi^2$  and  $p$ -value for each explanatory variable, and explained deviance (Deviance),  
 194 predicted  $R^2$  ( $R_{\text{pred}}^2$ ) and adjusted  $R^2$  ( $R_{\text{adj}}^2$ ) of each GAM model, and the sample size (N) fitted into  
 195 each model.

| 30 equal interval resolution |            |            |            |          |                     |                    |      |
|------------------------------|------------|------------|------------|----------|---------------------|--------------------|------|
| Predictor                    | Concurvity | $\chi^2$   | $p$ -value | Deviance | $R_{\text{pred}}^2$ | $R_{\text{adj}}^2$ | N    |
| $T_m$                        | 0.48       | 1252944.99 | < 0.001    |          |                     |                    |      |
| ln MI                        | 0.21       | 625065.58  | < 0.001    | 0.93     | 0.94                | 0.94               | 405  |
| Area                         | 0.24       | 250319.58  | < 0.001    |          |                     |                    |      |
| 40 equal interval resolution |            |            |            |          |                     |                    |      |
| Predictor                    | Concurvity | $\chi^2$   | $p$ -value | Deviance | $R_{\text{pred}}^2$ | $R_{\text{adj}}^2$ | N    |
| $T_m$                        | 0.43       | 1745430.59 | < 0.001    |          |                     |                    |      |
| ln MI                        | 0.18       | 877454.57  | < 0.001    | 0.92     | 0.91                | 0.91               | 628  |
| Area                         | 0.27       | 352504.99  | < 0.001    |          |                     |                    |      |
| 50 equal interval resolution |            |            |            |          |                     |                    |      |
| Predictor                    | Concurvity | $\chi^2$   | $p$ -value | Deviance | $R_{\text{pred}}^2$ | $R_{\text{adj}}^2$ | N    |
| $T_m$                        | 0.44       | 2073100.64 | < 0.001    |          |                     |                    |      |
| ln MI                        | 0.16       | 1046454.26 | < 0.001    | 0.90     | 0.90                | 0.90               | 896  |
| Area                         | 0.24       | 562136.56  | < 0.001    |          |                     |                    |      |
| 60 equal interval resolution |            |            |            |          |                     |                    |      |
| Predictor                    | Concurvity | $\chi^2$   | $p$ -value | Deviance | $R_{\text{pred}}^2$ | $R_{\text{adj}}^2$ | N    |
| $T_m$                        | 0.44       | 2360696.24 | < 0.001    |          |                     |                    |      |
| ln MI                        | 0.15       | 1236657.04 | < 0.001    | 0.89     | 0.88                | 0.88               | 1182 |
| Area                         | 0.22       | 752415.89  | < 0.001    |          |                     |                    |      |

196 **Table S9 | Summary of Generalised Additive Models (GAMs) incorporating bioclimatic**  
 197 **variables and the average geographic extent of climate across all selected geological**  
 198 **periods at multiple climatic space resolutions.** Summary statistics of GAMs fitted with species  
 199 richness as the response variable. Explanatory variables include recent (1901–1989) temperature

200 index ( $T_m$ , °C) and natural-log-transformed moisture index (ln MI, unitless), and the mean total land  
 201 area occupied by each climatic condition since its first appearance across all selected climatic  
 202 periods (Area, km<sup>2</sup>). Different GAMs were constructed based on climatic spaces defined by the  
 203 recent climatic conditions ( $T_m$  and ln MI) at four resolutions, with each climatic axis divided into 30,  
 204 40, 50 or 60 equal intervals. Reported metrics for each model include concavity,  $\chi^2$  and  $p$ -value for  
 205 each explanatory variable, and explained deviance (Deviance), predicted  $R^2$  ( $R_{pred}^2$ ) and adjusted  
 206  $R^2$  ( $R_{adj}^2$ ) of each GAM model, and the sample size (N) fitted into each model.

| 30 equal interval resolution |            |            |            |          |              |             |      |
|------------------------------|------------|------------|------------|----------|--------------|-------------|------|
| Predictor                    | Concurvity | $\chi^2$   | $p$ -value | Deviance | $R_{pred}^2$ | $R_{adj}^2$ | N    |
| $T_m$                        | 0.56       | 1095137.37 | < 0.001    |          |              |             |      |
| ln MI                        | 0.26       | 540113.96  | < 0.001    | 0.90     | 0.88         | 0.87        | 405  |
| Area                         | 0.38       | 21689.69   | < 0.001    |          |              |             |      |
| 40 equal interval resolution |            |            |            |          |              |             |      |
| Predictor                    | Concurvity | $\chi^2$   | $p$ -value | Deviance | $R_{pred}^2$ | $R_{adj}^2$ | N    |
| $T_m$                        | 0.54       | 1441724.54 | < 0.001    |          |              |             |      |
| ln MI                        | 0.23       | 665310.71  | < 0.001    | 0.88     | 0.85         | 0.84        | 628  |
| Area                         | 0.38       | 29428.30   | < 0.001    |          |              |             |      |
| 50 equal interval resolution |            |            |            |          |              |             |      |
| Predictor                    | Concurvity | $\chi^2$   | $p$ -value | Deviance | $R_{pred}^2$ | $R_{adj}^2$ | N    |
| $T_m$                        | 0.51       | 1593777.78 | < 0.001    |          |              |             |      |
| ln MI                        | 0.21       | 821338.15  | < 0.001    | 0.86     | 0.82         | 0.81        | 896  |
| Area                         | 0.38       | 86385.99   | < 0.001    |          |              |             |      |
| 60 equal interval resolution |            |            |            |          |              |             |      |
| Predictor                    | Concurvity | $\chi^2$   | $p$ -value | Deviance | $R_{pred}^2$ | $R_{adj}^2$ | N    |
| $T_m$                        | 0.54       | 1830603.38 | < 0.001    |          |              |             |      |
| ln MI                        | 0.20       | 903978.79  | < 0.001    | 0.84     | 0.79         | 0.78        | 1182 |
| Area                         | 0.35       | 115607.59  | < 0.001    |          |              |             |      |

207 **Table S10 | Relative importance of explanatory variables in Generalised Additive Models**  
 208 **(GAMs) incorporating bioclimatic variables and the geographic extent of climate.** Summary of  
 209 the relative importance of each explanatory variable in GAMs fitted across different geological  
 210 periods and multiple climatic space resolutions. Climatic space is defined by the recent (1901–1989)  
 211 climatic conditions ( $T_m$  and  $\ln MI$ ), partitioned into 30, 40, 50 or 60 equal intervals along each axis.  
 212 Species richness is the response variable. Explanatory variables include recent (1901–1989)  
 213 temperature index ( $T_m$ , °C) and natural-log-transformed moisture index ( $\ln MI$ , unitless), and total  
 214 land area occupied by each climatic condition (Area, km<sup>2</sup>) during different geological periods. The  
 215 method for calculating the relative importance of each explanatory variable is described in the  
 216 Methods section of the main text.

| 30 equal interval resolution            |        |          |        |             |
|-----------------------------------------|--------|----------|--------|-------------|
| Geological period                       | $T_m$  | $\ln MI$ | Area   | Unexplained |
| Eocene<br>(ca. 50 Ma)                   | 33.48% | 42.52%   | 15.69% | 8.31%       |
| Mid-Pliocene<br>(3.3–3.0 Ma)            | 27.97% | 30.72%   | 32.43% | 8.88%       |
| Last Glacial Maximum<br>(LGM, 22–18 ka) | 32.73% | 28.20%   | 29.85% | 9.22%       |
| Mid-Holocene<br>(ca. 6 ka)              | 27.94% | 28.03%   | 35.39% | 8.64%       |
| Pre-industrial<br>(pre-1850)            | 28.41% | 27.77%   | 35.16% | 8.67%       |
| Recent period<br>(1901–1989)            | 28.60% | 27.34%   | 37.46% | 6.60%       |
| Mean                                    | 27.15% | 27.03%   | 36.31% | 9.51%       |
| 40 equal interval resolution            |        |          |        |             |
| Geological period                       | $T_m$  | $\ln MI$ | Area   | Unexplained |
| Eocene                                  | 34.76% | 39.48%   | 15.18% | 10.58%      |

|                                         |        |        |        |        |
|-----------------------------------------|--------|--------|--------|--------|
| (ca. 50 Ma)                             |        |        |        |        |
| Mid-Pliocene<br>(3.3–3.0 Ma)            | 28.15% | 28.90% | 31.59% | 11.37% |
| Last Glacial Maximum<br>(LGM, 22–18 ka) | 34.46% | 28.02% | 25.66% | 11.87% |
| Mid-Holocene<br>(ca. 6 ka)              | 28.77% | 26.54% | 32.91% | 11.79% |
| Pre-industrial<br>(pre-1850)            | 29.04% | 26.40% | 33.84% | 10.72% |
| Recent period<br>(1901–1989)            | 30.01% | 25.84% | 35.67% | 8.48%  |
| Mean                                    | 27.96% | 25.14% | 35.04% | 11.85% |

#### 50 equal interval resolution

| Geological period                       | T <sub>m</sub> | ln MI  | Area   | Unexplained |
|-----------------------------------------|----------------|--------|--------|-------------|
| Eocene<br>(ca. 50 Ma)                   | 33.23%         | 38.20% | 15.55% | 13.02%      |
| Mid-Pliocene<br>(3.3–3.0 Ma)            | 28.23%         | 28.95% | 28.93% | 13.89%      |
| Last Glacial Maximum<br>(LGM, 22–18 ka) | 34.00%         | 27.65% | 23.84% | 14.51%      |
| Mid-Holocene<br>(ca. 6 ka)              | 28.32%         | 26.29% | 31.33% | 14.06%      |
| Pre-industrial<br>(pre-1850)            | 28.95%         | 26.10% | 31.50% | 13.45%      |
| Recent period<br>(1901–1989)            | 29.42%         | 25.11% | 35.60% | 9.88%       |
| Mean                                    | 26.88%         | 24.45% | 34.71% | 13.96%      |

#### 60 equal interval resolution

| Geological period                       | T <sub>m</sub> | ln MI  | Area   | Unexplained |
|-----------------------------------------|----------------|--------|--------|-------------|
| Eocene<br>(ca. 50 Ma)                   | 33.67%         | 35.90% | 14.40% | 16.02%      |
| Mid-Pliocene<br>(3.3–3.0 Ma)            | 28.77%         | 28.33% | 26.38% | 16.53%      |
| Last Glacial Maximum<br>(LGM, 22–18 ka) | 34.59%         | 26.37% | 21.98% | 17.06%      |
| Mid-Holocene<br>(ca. 6 ka)              | 28.45%         | 25.14% | 29.52% | 16.89%      |
| Pre-industrial<br>(pre-1850)            | 29.64%         | 25.23% | 28.79% | 16.34%      |
| Recent period<br>(1901–1989)            | 29.51%         | 23.96% | 35.19% | 11.34%      |
| Mean                                    | 27.12%         | 22.95% | 33.56% | 16.37%      |

217 **Table S11 | Summary of Generalised Linear Models (GLMs) incorporating bioclimatic**  
 218 **variables and the geographic extent of climate.** Summary of both linear GLMs and quadratic  
 219 GLMs incorporating second-order polynomial terms to account for non-linear relationships,  
 220 developed for each geological period. All models were constructed based on a climatic space  
 221 defined by the recent (1901–1989) climatic conditions (T<sub>m</sub> and ln MI), partitioned into 30 equal  
 222 intervals along each axis. Species richness is the response variable. Explanatory variables include  
 223 recent (1901–1989) temperature index (T<sub>m</sub>, °C) and natural-log-transformed moisture index (ln MI,  
 224 unitless), and total land area occupied by each climatic condition (Area, km<sup>2</sup>) during different  
 225 geological periods. The table reports key model statistics, including deviance, McFadden's R<sup>2</sup>,  
 226 Akaike information criterion (AIC) and sample size (N) for each model.

| Geological period | Model     | Deviance   | McFadden's R <sup>2</sup> | AIC        | N   |
|-------------------|-----------|------------|---------------------------|------------|-----|
| Eocene            | Linear    | 4557951.76 | 0.42                      | 4562008.83 | 405 |
| (ca. 50 Ma)       | Quadratic | 3350951.63 | 0.57                      | 3355014.69 |     |

|                      |           |            |      |            |     |
|----------------------|-----------|------------|------|------------|-----|
| Mid-Pliocene         | Linear    | 3794049.22 | 0.52 | 3798106.28 | 405 |
| (3.3–3.0 Ma)         | Quadratic | 2330398.35 | 0.70 | 2334461.41 |     |
| Last Glacial Maximum | Linear    | 3044519.46 | 0.61 | 3048576.53 | 405 |
| (LGM, 22–18 ka)      | Quadratic | 1948587.22 | 0.75 | 1952650.29 |     |
| Mid-Holocene         | Linear    | 3165583.22 | 0.60 | 3169640.28 | 405 |
| (ca. 6 ka)           | Quadratic | 1781927.91 | 0.77 | 1785990.98 |     |
| Pre-industrial       | Linear    | 3455835.36 | 0.56 | 3459892.42 | 405 |
| (pre-1850)           | Quadratic | 1751546.27 | 0.78 | 1755609.34 |     |
| Recent period        | Linear    | 3466057.64 | 0.56 | 3470114.70 | 405 |
| (1901–1989)          | Quadratic | 1414545.75 | 0.82 | 1418608.81 |     |
| Mean                 | Linear    | 2836269.57 | 0.64 | 2840326.64 | 405 |
|                      | Quadratic | 1427989.61 | 0.82 | 1432052.68 |     |



228 **Table S12 | Coefficients of explanatory variables in Generalised Linear Models (GLMs) incorporating bioclimatic variables and the**  
 229 **geographic extent of climate.** Summary of the coefficients (Estimate and *p*-value) of explanatory variables in both linear GLMs and quadratic GLMs  
 230 incorporating second-order polynomial terms to account for non-linear relationships, developed for each geological period. All models were  
 231 constructed based on a climatic space defined by the recent (1901–1989) climatic conditions ( $T_m$  and  $\ln MI$ ), partitioned into 30 equal intervals along  
 232 each axis. Species richness is the response variable. Explanatory variables include recent (1901–1989) temperature index ( $T_m$ , °C) and  
 233 natural-log-transformed moisture index ( $\ln MI$ , unitless), and total land area occupied by each climatic condition (Area, km<sup>2</sup>) during different  
 234 geological periods.

| Geological period            | Model     | Coefficient     | $T_m$                 | $T_m^2$                | $\ln MI$              | $\ln MI^2$             | Area                  | Area <sup>2</sup>       |
|------------------------------|-----------|-----------------|-----------------------|------------------------|-----------------------|------------------------|-----------------------|-------------------------|
| Eocene<br>(ca. 50 Ma)        | Linear    | Estimate        | $5.54 \times 10^{-2}$ | --                     | $2.28 \times 10^{-1}$ | --                     | $1.55 \times 10^{-7}$ | --                      |
|                              |           | <i>p</i> -value | < 0.001               | --                     | < 0.001               | --                     | < 0.001               | --                      |
|                              | Quadratic | Estimate        | $1.26 \times 10^{-1}$ | $-3.26 \times 10^{-3}$ | $7.20 \times 10^{-2}$ | $-4.57 \times 10^{-2}$ | $8.98 \times 10^{-7}$ | $-4.04 \times 10^{-13}$ |
|                              |           | <i>p</i> -value | < 0.001               | < 0.001                | < 0.001               | < 0.001                | < 0.001               | < 0.001                 |
| Mid-Pliocene<br>(3.3–3.0 Ma) | Linear    | Estimate        | $4.07 \times 10^{-2}$ | --                     | $1.72 \times 10^{-1}$ | --                     | $6.82 \times 10^{-7}$ | --                      |
|                              |           | <i>p</i> -value | < 0.001               | --                     | < 0.001               | --                     | < 0.001               | --                      |
|                              | Quadratic | Estimate        | $1.10 \times 10^{-1}$ | $-3.27 \times 10^{-3}$ | $9.18 \times 10^{-2}$ | $-1.12 \times 10^{-2}$ | $2.11 \times 10^{-6}$ | $-7.46 \times 10^{-13}$ |
|                              |           | <i>p</i> -value | < 0.001               | < 0.001                | < 0.001               | < 0.001                | < 0.001               | < 0.001                 |
| Last Glacial Maximum         | Linear    | Estimate        | $4.92 \times 10^{-2}$ | --                     | $1.83 \times 10^{-1}$ | --                     | $6.22 \times 10^{-7}$ | --                      |

|                              |           |                 |                       |                        |                       |                        |                       |                         |
|------------------------------|-----------|-----------------|-----------------------|------------------------|-----------------------|------------------------|-----------------------|-------------------------|
| (LGM, 22–18 ka)              | Quadratic | <i>p</i> -value | < 0.001               | --                     | < 0.001               | --                     | < 0.001               | --                      |
|                              |           | Estimate        | $9.80 \times 10^{-2}$ | $-2.17 \times 10^{-3}$ | $1.61 \times 10^{-1}$ | $-4.08 \times 10^{-3}$ | $1.63 \times 10^{-6}$ | $-3.91 \times 10^{-13}$ |
|                              |           | <i>p</i> -value | < 0.001               | < 0.001                | < 0.001               | < 0.001                | < 0.001               | < 0.001                 |
|                              | Linear    | Estimate        | $4.28 \times 10^{-2}$ | --                     | $1.68 \times 10^{-1}$ | --                     | $5.73 \times 10^{-7}$ | --                      |
|                              |           | <i>p</i> -value | < 0.001               | --                     | < 0.001               | --                     | < 0.001               | --                      |
|                              | Quadratic | Estimate        | $1.11 \times 10^{-1}$ | $-3.22 \times 10^{-3}$ | $1.26 \times 10^{-1}$ | $-5.27 \times 10^{-3}$ | $1.46 \times 10^{-6}$ | $-2.66 \times 10^{-13}$ |
|                              |           | <i>p</i> -value | < 0.001               | < 0.001                | < 0.001               | < 0.001                | < 0.001               | < 0.001                 |
| Mid-Holocene<br>(ca. 6 ka)   | Linear    | Estimate        | $4.33 \times 10^{-2}$ | --                     | $1.75 \times 10^{-1}$ | --                     | $5.07 \times 10^{-7}$ | --                      |
|                              |           | <i>p</i> -value | < 0.001               | --                     | < 0.001               | --                     | < 0.001               | --                      |
|                              | Quadratic | Estimate        | $1.26 \times 10^{-1}$ | $-4.04 \times 10^{-3}$ | $1.10 \times 10^{-1}$ | $-6.66 \times 10^{-3}$ | $1.50 \times 10^{-6}$ | $-2.43 \times 10^{-13}$ |
|                              |           | <i>p</i> -value | < 0.001               | < 0.001                | < 0.001               | < 0.001                | < 0.001               | < 0.001                 |
| Pre-industrial<br>(pre-1850) | Linear    | Estimate        | $4.34 \times 10^{-2}$ | --                     | $1.88 \times 10^{-1}$ | --                     | $5.37 \times 10^{-7}$ | --                      |
|                              |           | <i>p</i> -value | < 0.001               | --                     | < 0.001               | --                     | < 0.001               | --                      |
|                              | Quadratic | Estimate        | $1.32 \times 10^{-1}$ | $-4.21 \times 10^{-3}$ | $1.88 \times 10^{-1}$ | $4.04 \times 10^{-4}$  | $1.88 \times 10^{-6}$ | $-3.59 \times 10^{-13}$ |
|                              |           | <i>p</i> -value | < 0.001               | < 0.001                | < 0.001               | < 0.001                | < 0.001               | < 0.001                 |
| Recent period<br>(1901–1989) | Linear    | Estimate        | $3.72 \times 10^{-2}$ | --                     | $1.39 \times 10^{-1}$ | --                     | $9.43 \times 10^{-7}$ | --                      |
|                              |           | <i>p</i> -value | < 0.001               | --                     | < 0.001               | --                     | < 0.001               | --                      |
|                              | Quadratic | Estimate        | $1.06 \times 10^{-1}$ | $-3.28 \times 10^{-3}$ | $3.49 \times 10^{-2}$ | $-1.43 \times 10^{-2}$ | $2.26 \times 10^{-6}$ | $-5.26 \times 10^{-13}$ |
|                              |           | <i>p</i> -value | < 0.001               | < 0.001                | < 0.001               | < 0.001                | < 0.001               | < 0.001                 |
| Mean                         | Linear    | Estimate        | $3.72 \times 10^{-2}$ | --                     | $1.39 \times 10^{-1}$ | --                     | $9.43 \times 10^{-7}$ | --                      |
|                              |           | <i>p</i> -value | < 0.001               | --                     | < 0.001               | --                     | < 0.001               | --                      |
|                              | Quadratic | Estimate        | $1.06 \times 10^{-1}$ | $-3.28 \times 10^{-3}$ | $3.49 \times 10^{-2}$ | $-1.43 \times 10^{-2}$ | $2.26 \times 10^{-6}$ | $-5.26 \times 10^{-13}$ |
|                              |           | <i>p</i> -value | < 0.001               | < 0.001                | < 0.001               | < 0.001                | < 0.001               | < 0.001                 |

235 **Table S13 | Summary of the Generalised Additive Models (GAMs) with species richness as**  
 236 **the response variable and climate and its deep-time geographic dynamics as explanatory**  
 237 **variables for all recent climatic conditions across multiple climatic space resolutions.**  
 238 Summary statistics of GAMs fitted with species richness as the response variable. Explanatory  
 239 variables include:  $T_m$  ( $^{\circ}\text{C}$ ), recent (1901–1989) temperature index;  $\ln$  MI (unitless), recent  
 240 natural-log-transformed moisture index; Recent Area ( $\text{km}^2$ ), total land area occupied by a climatic  
 241 condition in the recent period;  $\Delta\text{Area}$  ( $\text{km}^2$ ), change in total land area occupied by a climatic  
 242 condition from its earliest occurrence to the recent period; Movement (km), geographic shift of a  
 243 climatic condition since its earliest occurrence to the recent period. Different GAMs were  
 244 constructed based on climatic spaces defined by the recent climatic conditions ( $T_m$  and  $\ln$  MI) at four  
 245 resolutions, with each climatic axis divided into 30, 40, 50 or 60 equal intervals. Reported metrics  
 246 for each model include concurvity,  $\chi^2$  and  $p$ -value for each explanatory variable, and explained  
 247 deviance (Deviance), predicted  $R^2$  ( $R_{\text{pred}}^2$ ) and adjusted  $R^2$  ( $R_{\text{adj}}^2$ ) of each GAM model, and the  
 248 sample size (N) fitted into each model.

| 30 equal interval resolution |            |           |            |          |                     |                    |     |
|------------------------------|------------|-----------|------------|----------|---------------------|--------------------|-----|
| Predictor                    | Concurvity | $\chi^2$  | $p$ -value | Deviance | $R_{\text{pred}}^2$ | $R_{\text{adj}}^2$ | N   |
| $T_m$                        | 0.68       | 485359.95 | < 0.001    |          |                     |                    |     |
| $\ln$ MI                     | 0.57       | 243133.72 | < 0.001    |          |                     |                    |     |
| Recent Area                  | 0.84       | 106864.19 | < 0.001    | 0.95     | 0.95                | 0.95               | 342 |
| $\Delta\text{Area}$          | 0.62       | 35550.61  | < 0.001    |          |                     |                    |     |
| Movement                     | 0.42       | 41212.21  | < 0.001    |          |                     |                    |     |
| 40 equal interval resolution |            |           |            |          |                     |                    |     |
| Predictor                    | Concurvity | $\chi^2$  | $p$ -value | Deviance | $R_{\text{pred}}^2$ | $R_{\text{adj}}^2$ | N   |
| $T_m$                        | 0.63       | 656361.87 | < 0.001    |          |                     |                    |     |
| $\ln$ MI                     | 0.53       | 341180.83 | < 0.001    |          |                     |                    |     |
| Recent Area                  | 0.76       | 213932.33 | < 0.001    | 0.93     | 0.93                | 0.92               | 529 |
| $\Delta\text{Area}$          | 0.55       | 37366.92  | < 0.001    |          |                     |                    |     |

| Movement                     | 0.43       | 28029.86  | < 0.001         |          |                     |                    |     |
|------------------------------|------------|-----------|-----------------|----------|---------------------|--------------------|-----|
| 50 equal interval resolution |            |           |                 |          |                     |                    |     |
| Predictor                    | Concurvity | $\chi^2$  | <i>p</i> -value | Deviance | $R_{\text{pred}}^2$ | $R_{\text{adj}}^2$ | N   |
| $T_m$                        | 0.68       | 824598.86 | < 0.001         |          |                     |                    |     |
| ln MI                        | 0.50       | 465665.46 | < 0.001         |          |                     |                    |     |
| Recent Area                  | 0.76       | 325886.77 | < 0.001         | 0.91     | 0.91                | 0.91               | 751 |
| $\Delta$ Area                | 0.55       | 20190.12  | < 0.001         |          |                     |                    |     |
| Movement                     | 0.40       | 55998.89  | < 0.001         |          |                     |                    |     |
| 60 equal interval resolution |            |           |                 |          |                     |                    |     |
| Predictor                    | Concurvity | $\chi^2$  | <i>p</i> -value | Deviance | $R_{\text{pred}}^2$ | $R_{\text{adj}}^2$ | N   |
| $T_m$                        | 0.61       | 885554.69 | < 0.001         |          |                     |                    |     |
| ln MI                        | 0.48       | 591684.02 | < 0.001         |          |                     |                    |     |
| Recent Area                  | 0.77       | 381718.80 | < 0.001         | 0.90     | 0.90                | 0.89               | 986 |
| $\Delta$ Area                | 0.55       | 40336.41  | < 0.001         |          |                     |                    |     |
| Movement                     | 0.39       | 90781.19  | < 0.001         |          |                     |                    |     |

249 **Table S14 | Summary of the Generalised Additive Models (GAMs) with species richness as**  
 250 **the response variable and climate and its deep-time geographic dynamics as explanatory**  
 251 **variables for recent climatic conditions that first appeared in the Eocene (ca. 50 Ma), across**  
 252 **multiple climatic space resolutions.** Summary statistics of GAMs fitted with species richness as  
 253 the response variable. Explanatory variables include:  $T_m$  (°C), recent (1901–1989) temperature  
 254 index; ln MI (unitless), recent natural-log-transformed moisture index; Recent Area (km<sup>2</sup>), total land  
 255 area occupied by a climatic condition in the recent period;  $\Delta$ Area (km<sup>2</sup>), change in total land area  
 256 occupied by a climatic condition from its earliest occurrence (i.e. Eocene) to the recent period;  
 257 Movement (km), geographic shift of a climatic condition since its earliest occurrence (i.e. Eocene) to  
 258 the recent period. Different GAMs were constructed based on climatic spaces defined by the recent  
 259 climatic conditions ( $T_m$  and ln MI) at four resolutions, with each climatic axis divided into 30, 40, 50  
 260 or 60 equal intervals. Reported metrics for each model include concurvity,  $\chi^2$  and *p*-value for each

261 explanatory variable, and explained deviance (Deviance), predicted  $R^2$  ( $R_{pred}^2$ ) and adjusted  $R^2$   
 262 ( $R_{adj}^2$ ) of each GAM model, and the sample size (N) fitted into each model.

| 30 equal interval resolution |            |           |            |          |              |             |     |
|------------------------------|------------|-----------|------------|----------|--------------|-------------|-----|
| Predictor                    | Concurvity | $\chi^2$  | $p$ -value | Deviance | $R_{pred}^2$ | $R_{adj}^2$ | N   |
| T <sub>m</sub>               | 0.69       | 208593.97 | < 0.001    | 0.92     | 0.92         | 0.90        | 88  |
| ln MI                        | 0.82       | 161160.60 | < 0.001    |          |              |             |     |
| Recent Area                  | 0.77       | 29935.28  | < 0.001    |          |              |             |     |
| $\Delta$ Area                | 0.79       | 15949.11  | < 0.001    |          |              |             |     |
| Movement                     | 0.47       | 37054.35  | < 0.001    |          |              |             |     |
| 40 equal interval resolution |            |           |            |          |              |             |     |
| Predictor                    | Concurvity | $\chi^2$  | $p$ -value | Deviance | $R_{pred}^2$ | $R_{adj}^2$ | N   |
| T <sub>m</sub>               | 0.75       | 156233.82 | < 0.001    | 0.95     | 0.96         | 0.94        | 137 |
| ln MI                        | 0.82       | 146852.11 | < 0.001    |          |              |             |     |
| Recent Area                  | 0.87       | 85445.79  | < 0.001    |          |              |             |     |
| $\Delta$ Area                | 0.72       | 13256.22  | < 0.001    |          |              |             |     |
| Movement                     | 0.66       | 16157.92  | < 0.001    |          |              |             |     |
| 50 equal interval resolution |            |           |            |          |              |             |     |
| Predictor                    | Concurvity | $\chi^2$  | $p$ -value | Deviance | $R_{pred}^2$ | $R_{adj}^2$ | N   |
| T <sub>m</sub>               | 0.70       | 228305.67 | < 0.001    | 0.94     | 0.95         | 0.93        | 195 |
| ln MI                        | 0.80       | 144820.57 | < 0.001    |          |              |             |     |
| Recent Area                  | 0.83       | 111722.55 | < 0.001    |          |              |             |     |
| $\Delta$ Area                | 0.70       | 19006.82  | < 0.001    |          |              |             |     |
| Movement                     | 0.59       | 16238.15  | < 0.001    |          |              |             |     |
| 60 equal interval resolution |            |           |            |          |              |             |     |
| Predictor                    | Concurvity | $\chi^2$  | $p$ -value | Deviance | $R_{pred}^2$ | $R_{adj}^2$ | N   |
| T <sub>m</sub>               | 0.66       | 245215.03 | < 0.001    | 0.93     | 0.93         | 0.91        | 258 |
| ln MI                        | 0.77       | 219098.10 | < 0.001    |          |              |             |     |

|             |      |           |         |
|-------------|------|-----------|---------|
| Recent Area | 0.85 | 132211.70 | < 0.001 |
| ΔArea       | 0.72 | 14352.42  | < 0.001 |
| Movement    | 0.45 | 30592.89  | < 0.001 |

**Table S15 | Summary of the Generalised Additive Models (GAMs) with species richness as the response variable and climate and its deep-time geographic dynamics as explanatory variables for recent climatic conditions that first appeared in the Mid-Pliocene (3.3–3.0 Ma), across multiple climatic space resolutions.** Summary statistics of GAMs fitted with species richness as the response variable. Explanatory variables include:  $T_m$  (°C), recent (1901–1989) temperature index;  $\ln MI$  (unitless), recent natural-log-transformed moisture index; Recent Area (km<sup>2</sup>), total land area occupied by a climatic condition in the recent period; ΔArea (km<sup>2</sup>), change in total land area occupied by a climatic condition from its earliest occurrence (i.e. Mid-Pliocene) to the recent period; Movement (km), geographic shift of a climatic condition since its earliest occurrence (i.e. Mid-Pliocene) to the recent period. Different GAMs were constructed based on climatic spaces defined by the recent climatic conditions ( $T_m$  and  $\ln MI$ ) at four resolutions, with each climatic axis divided into 30, 40, 50 or 60 equal intervals. Reported metrics for each model include concurvity,  $\chi^2$  and  $p$ -value for each explanatory variable, and explained deviance (Deviance), predicted  $R^2$  ( $R_{pred}^2$ ) and adjusted  $R^2$  ( $R_{adj}^2$ ) of each GAM model, and the sample size (N) fitted into each model.

| 30 equal interval resolution |            |           |            |          |              |             |     |
|------------------------------|------------|-----------|------------|----------|--------------|-------------|-----|
| Predictor                    | Concurvity | $\chi^2$  | $p$ -value | Deviance | $R_{pred}^2$ | $R_{adj}^2$ | N   |
| $T_m$                        | 0.74       | 124085.91 | < 0.001    |          |              |             |     |
| $\ln MI$                     | 0.69       | 80856.61  | < 0.001    |          |              |             |     |
| Recent Area                  | 0.56       | 109540.94 | < 0.001    | 0.94     | 0.94         | 0.93        | 140 |
| ΔArea                        | 0.22       | 497.03    | < 0.001    |          |              |             |     |
| Movement                     | 0.48       | 9512.98   | < 0.001    |          |              |             |     |
| 40 equal interval resolution |            |           |            |          |              |             |     |
| Predictor                    | Concurvity | $\chi^2$  | $p$ -value | Deviance | $R_{pred}^2$ | $R_{adj}^2$ | N   |
| $T_m$                        | 0.78       | 171294.45 | < 0.001    | 0.94     | 0.95         | 0.93        | 212 |

| In MI                               | 0.66       | 127666.29 | < 0.001         |          |                     |                    |     |
|-------------------------------------|------------|-----------|-----------------|----------|---------------------|--------------------|-----|
| Recent Area                         | 0.81       | 32466.22  | < 0.001         |          |                     |                    |     |
| $\Delta$ Area                       | 0.60       | 10527.97  | < 0.001         |          |                     |                    |     |
| Movement                            | 0.45       | 15544.55  | < 0.001         |          |                     |                    |     |
| <b>50 equal interval resolution</b> |            |           |                 |          |                     |                    |     |
| Predictor                           | Concurvity | $\chi^2$  | <i>p</i> -value | Deviance | $R_{\text{pred}}^2$ | $R_{\text{adj}}^2$ | N   |
| $T_m$                               | 0.74       | 248967.86 | < 0.001         |          |                     |                    |     |
| In MI                               | 0.64       | 180867.76 | < 0.001         |          |                     |                    |     |
| Recent Area                         | 0.71       | 57224.37  | < 0.001         | 0.93     | 0.93                | 0.92               | 307 |
| $\Delta$ Area                       | 0.52       | 20857.56  | < 0.001         |          |                     |                    |     |
| Movement                            | 0.42       | 26931.11  | < 0.001         |          |                     |                    |     |
| <b>60 equal interval resolution</b> |            |           |                 |          |                     |                    |     |
| Predictor                           | Concurvity | $\chi^2$  | <i>p</i> -value | Deviance | $R_{\text{pred}}^2$ | $R_{\text{adj}}^2$ | N   |
| $T_m$                               | 0.73       | 229332.72 | < 0.001         |          |                     |                    |     |
| In MI                               | 0.64       | 227880.25 | < 0.001         |          |                     |                    |     |
| Recent Area                         | 0.84       | 69952.47  | < 0.001         | 0.90     | 0.89                | 0.88               | 411 |
| $\Delta$ Area                       | 0.63       | 22303.51  | < 0.001         |          |                     |                    |     |
| Movement                            | 0.40       | 32335.03  | < 0.001         |          |                     |                    |     |

277 **Table S16 | Summary of the Generalised Additive Models (GAMs) with species richness as**  
 278 **the response variable and climate and its deep-time geographic dynamics as explanatory**  
 279 **variables for recent climatic conditions that first appeared in the Last Glacial Maximum (LGM,**  
 280 **22–18 ka), across multiple climatic space resolutions.** Summary statistics of GAMs fitted with  
 281 species richness as the response variable. Explanatory variables include:  $T_m$  (°C), recent (1901–  
 282 1989) temperature index; In MI (unitless), recent natural-log-transformed moisture index; Recent  
 283 Area (km<sup>2</sup>), total land area occupied by a climatic condition in the recent period;  $\Delta$ Area (km<sup>2</sup>),  
 284 change in total land area occupied by a climatic condition from its earliest occurrence (i.e. LGM) to  
 285 the recent period; Movement (km), geographic shift of a climatic condition since its earliest  
 286 occurrence (i.e. LGM) to the recent period. Different GAMs were constructed based on climatic

spaces defined by the recent climatic conditions ( $T_m$  and  $\ln MI$ ) at four resolutions, with each climatic axis divided into 30, 40, 50 or 60 equal intervals. Reported metrics for each model include concavity,  $\chi^2$  and  $p$ -value for each explanatory variable, and explained deviance (Deviance), predicted  $R^2$  ( $R_{pred}^2$ ) and adjusted  $R^2$  ( $R_{adj}^2$ ) of each GAM model, and the sample size ( $N$ ) fitted into each model.

| 30 equal interval resolution |            |          |            |          |              |             |     |
|------------------------------|------------|----------|------------|----------|--------------|-------------|-----|
| Predictor                    | Concurvity | $\chi^2$ | $p$ -value | Deviance | $R_{pred}^2$ | $R_{adj}^2$ | N   |
| $T_m$                        | 0.87       | 29297.00 | < 0.001    |          |              |             |     |
| $\ln MI$                     | 0.86       | 10462.70 | < 0.001    |          |              |             |     |
| Recent Area                  | 0.85       | 4936.89  | < 0.001    | 0.86     | 0.79         | 0.74        | 96  |
| $\Delta Area$                | 0.53       | 435.82   | < 0.001    |          |              |             |     |
| Movement                     | 0.54       | 6219.60  | < 0.001    |          |              |             |     |
| 40 equal interval resolution |            |          |            |          |              |             |     |
| Predictor                    | Concurvity | $\chi^2$ | $p$ -value | Deviance | $R_{pred}^2$ | $R_{adj}^2$ | N   |
| $T_m$                        | 0.90       | 33161.67 | < 0.001    |          |              |             |     |
| $\ln MI$                     | 0.86       | 7298.11  | < 0.001    |          |              |             |     |
| Recent Area                  | 0.88       | 9135.40  | < 0.001    | 0.93     | 0.94         | 0.91        | 146 |
| $\Delta Area$                | 0.61       | 2011.42  | < 0.001    |          |              |             |     |
| Movement                     | 0.61       | 3888.90  | < 0.001    |          |              |             |     |
| 50 equal interval resolution |            |          |            |          |              |             |     |
| Predictor                    | Concurvity | $\chi^2$ | $p$ -value | Deviance | $R_{pred}^2$ | $R_{adj}^2$ | N   |
| $T_m$                        | 0.86       | 43972.48 | < 0.001    |          |              |             |     |
| $\ln MI$                     | 0.80       | 6645.51  | < 0.001    |          |              |             |     |
| Recent Area                  | 0.86       | 8718.15  | < 0.001    | 0.89     | 0.88         | 0.84        | 197 |
| $\Delta Area$                | 0.62       | 2742.06  | < 0.001    |          |              |             |     |
| Movement                     | 0.39       | 6989.94  | < 0.001    |          |              |             |     |
| 60 equal interval resolution |            |          |            |          |              |             |     |



| Predictor     | Concurvity | $\chi^2$ | <i>p</i> -value | Deviance | $R_{\text{pred}}^2$ | $R_{\text{adj}}^2$ | N   |
|---------------|------------|----------|-----------------|----------|---------------------|--------------------|-----|
| $T_m$         | 0.87       | 55468.33 | < 0.001         |          |                     |                    |     |
| ln MI         | 0.77       | 9558.44  | < 0.001         |          |                     |                    |     |
| Recent Area   | 0.86       | 14550.80 | < 0.001         | 0.89     | 0.88                | 0.85               | 255 |
| $\Delta$ Area | 0.57       | 2113.34  | < 0.001         |          |                     |                    |     |
| Movement      | 0.31       | 13362.34 | < 0.001         |          |                     |                    |     |

292 **Table S17 | Relative importance of explanatory variables in Generalised Additive Models**  
293 **(GAMs) with species richness as the response variable and climate and its deep-time**  
294 **geographic dynamics as explanatory variables.** Summary of the relative importance of each  
295 explanatory variable in GAMs fitted for all recent climatic conditions, as well as separately according  
296 to their first appearance. Species richness is the response variable. Explanatory variables include:  
297  $T_m$  (°C), recent (1901–1989) temperature index; ln MI (unitless), recent natural-log-transformed  
298 moisture index; Recent Area (km<sup>2</sup>), total land area occupied by a climatic condition in the recent  
299 period;  $\Delta$ Area (km<sup>2</sup>), change in total land area occupied by a climatic condition from its earliest  
300 occurrence to the recent period; Movement (km), geographic shift of a climatic condition since its  
301 earliest occurrence to the recent period. Different GAMs were constructed based on climatic spaces  
302 defined by the recent climatic conditions ( $T_m$  and ln MI) at four resolutions, with each climatic axis  
303 divided into 30, 40, 50 or 60 equal intervals. The method for calculating the relative importance of  
304 each explanatory variable is described in the Methods section of the main text.

| 30 equal interval resolution |        |        |             |               |          |             |
|------------------------------|--------|--------|-------------|---------------|----------|-------------|
| Geological period            | $T_m$  | ln MI  | Recent Area | $\Delta$ Area | Movement | Unexplained |
| All periods                  | 19.68% | 19.19% | 26.77%      | 9.34%         | 20.05%   | 4.97%       |
| Eocene<br>(ca. 50 Ma)        | 20.93% | 28.68% | 23.22%      | 9.76%         | 9.07%    | 8.33%       |
| Mid-Pliocene<br>(3.3–3.0 Ma) | 18.15% | 25.46% | 27.45%      | 2.45%         | 20.21%   | 6.29%       |
| Last Glacial Maximum         | 29.47% | 24.21% | 16.96%      | 11.09%        | 4.26%    | 14.01%      |

(LGM, 22–18 ka)

| 40 equal interval resolution            |                |        |        |        |          |             |
|-----------------------------------------|----------------|--------|--------|--------|----------|-------------|
| Geological period                       | T <sub>m</sub> | In MI  | Area   | ΔArea  | Movement | Unexplained |
| All periods                             | 20.24%         | 18.24% | 25.90% | 9.24%  | 19.25%   | 7.13%       |
| Eocene<br>(ca. 50 Ma)                   | 23.53%         | 25.84% | 25.23% | 10.18% | 10.57%   | 4.65%       |
| Mid-Pliocene<br>(3.3–3.0 Ma)            | 17.59%         | 25.68% | 26.08% | 6.47%  | 18.62%   | 5.56%       |
| Last Glacial Maximum<br>(LGM, 22–18 ka) | 28.99%         | 21.79% | 22.54% | 14.51% | 5.17%    | 7.00%       |
| 50 equal interval resolution            |                |        |        |        |          |             |
| Geological period                       | T <sub>m</sub> | In MI  | Area   | ΔArea  | Movement | Unexplained |
| All periods                             | 19.80%         | 17.71% | 25.36% | 9.86%  | 18.75%   | 8.52%       |
| Eocene<br>(ca. 50 Ma)                   | 21.89%         | 24.49% | 26.06% | 11.10% | 10.51%   | 5.94%       |
| Mid-Pliocene<br>(3.3–3.0 Ma)            | 18.11%         | 24.24% | 22.87% | 9.50%  | 18.66%   | 6.62%       |
| Last Glacial Maximum<br>(LGM, 22–18 ka) | 30.20%         | 21.19% | 19.61% | 13.88% | 4.25%    | 10.86%      |
| 60 equal interval resolution            |                |        |        |        |          |             |
| Geological period                       | T <sub>m</sub> | In MI  | Area   | ΔArea  | Movement | Unexplained |
| All periods                             | 19.85%         | 16.96% | 24.59% | 9.85%  | 19.12%   | 9.63%       |
| Eocene<br>(ca. 50 Ma)                   | 22.60%         | 24.90% | 24.78% | 10.14% | 10.14%   | 7.44%       |
| Mid-Pliocene<br>(3.3–3.0 Ma)            | 15.84%         | 22.54% | 23.56% | 9.80%  | 17.84%   | 10.44%      |
| Last Glacial Maximum<br>(LGM, 22–18 ka) | 28.87%         | 20.58% | 19.49% | 13.07% | 6.84%    | 11.15%      |

305 **Table S18 | Summary of Generalised Linear Models (GLMs) with species richness as the**  
 306 **response variable and climate and its deep-time geographic dynamics as explanatory**  
 307 **variables.** Summary of both linear GLMs and quadratic GLMs incorporating second-order  
 308 polynomial terms to account for non-linear relationships, developed for all recent climatic conditions,  
 309 as well as separately according to their first appearance. Species richness is the response variable.  
 310 Explanatory variables include:  $T_m$  ( $^{\circ}\text{C}$ ), recent (1901–1989) temperature index;  $\ln$  MI (unitless),  
 311 recent natural-log-transformed moisture index; Recent Area ( $\text{km}^2$ ), total land area occupied by a  
 312 climatic condition in the recent period;  $\Delta$ Area ( $\text{km}^2$ ), change in total land area occupied by a climatic  
 313 condition from its earliest occurrence to the recent period; Movement (km), geographic shift of a  
 314 climatic condition since its earliest occurrence to the recent period. Different GLMs were  
 315 constructed based on climatic spaces defined by the recent climatic conditions ( $T_m$  and  $\ln$  MI) at four  
 316 resolutions, with each climatic axis divided into 30, 40, 50 or 60 equal intervals. The table reports  
 317 key model statistics, including deviance, McFadden's  $R^2$ , Akaike information criterion (AIC) and  
 318 sample size (N) for each model.

| Geological period                       | Model     | Deviance   | McFadden's $R^2$ | AIC        | N   |
|-----------------------------------------|-----------|------------|------------------|------------|-----|
| All periods                             | Linear    | 2865670.43 | 0.58             | 2869198.44 | 342 |
|                                         | Quadratic | 1051793.47 | 0.85             | 1055331.47 |     |
| Eocene<br>(ca. 50 Ma)                   | Linear    | 1196024.18 | 0.43             | 1197042.33 | 88  |
|                                         | Quadratic | 355709.28  | 0.83             | 356737.43  |     |
| Mid-Pliocene<br>(3.3–3.0 Ma)            | Linear    | 669166.38  | 0.65             | 670670.58  | 140 |
|                                         | Quadratic | 126914.60  | 0.93             | 128428.79  |     |
| Last Glacial Maximum<br>(LGM, 22–18 ka) | Linear    | 147733.41  | 0.48             | 148620.13  | 96  |
|                                         | Quadratic | 64219.10   | 0.77             | 65115.82   |     |

319

320 **Table S19 | Coefficients of explanatory variables in Generalised Linear Models (GLMs) with species richness as the response variable and**  
321 **climate and its deep-time geographic dynamics as explanatory variables.** Summary of the coefficients (Estimate and *p*-value) of explanatory  
322 variables in both linear GLMs and quadratic GLMs incorporating second-order polynomial terms to account for non-linear relationships, developed for  
323 all recent climatic conditions, as well as separately according to their first appearance. Species richness is the response variable. Explanatory  
324 variables include:  $T_m$  (°C), recent (1901–1989) temperature index;  $\ln MI$  (unitless), recent natural-log-transformed moisture index; Recent Area (km<sup>2</sup>),  
325 total land area occupied by a climatic condition in the recent period;  $\Delta Area$  (km<sup>2</sup>), change in total land area occupied by a climatic condition from its  
326 earliest occurrence to the recent period; Movement (km), geographic shift of a climatic condition since its earliest occurrence to the recent period.  
327 Different GLMs were constructed based on climatic spaces defined by the recent climatic conditions ( $T_m$  and  $\ln MI$ ) at four resolutions, with each  
328 climatic axis divided into 30, 40, 50 or 60 equal intervals.

| Geological period     | Model     | Coefficient     | $T_m$                 | $T_m^2$                | $\ln MI$              | $\ln MI^2$             | Recent<br>Area        | Recent<br>Area <sup>2</sup> | $\Delta Area$          | $\Delta Area^2$         | Movement              | Movement <sup>2</sup>  |
|-----------------------|-----------|-----------------|-----------------------|------------------------|-----------------------|------------------------|-----------------------|-----------------------------|------------------------|-------------------------|-----------------------|------------------------|
| All periods           | Linear    | Estimate        | $3.24 \times 10^{-2}$ | --                     | $1.78 \times 10^{-1}$ | --                     | $5.21 \times 10^{-7}$ | --                          | $-4.11 \times 10^{-8}$ | --                      | $8.70 \times 10^{-5}$ | --                     |
|                       |           | <i>p</i> -value | < 0.001               | --                     | < 0.001               | --                     | < 0.001               | --                          | < 0.001                | --                      | < 0.001               | --                     |
|                       | Quadratic | Estimate        | $1.27 \times 10^{-1}$ | $-3.94 \times 10^{-3}$ | $1.22 \times 10^{-1}$ | $-4.05 \times 10^{-2}$ | $1.51 \times 10^{-6}$ | $-2.81 \times 10^{-13}$     | $4.03 \times 10^{-8}$  | $-3.64 \times 10^{-15}$ | $2.05 \times 10^{-4}$ | $-1.35 \times 10^{-8}$ |
|                       |           | <i>p</i> -value | < 0.001               | < 0.001                | < 0.001               | < 0.001                | < 0.001               | < 0.001                     | < 0.001                | < 0.001                 | < 0.001               | < 0.001                |
| Eocene<br>(ca. 50 Ma) | Linear    | Estimate        | $3.55 \times 10^{-3}$ | --                     | $9.83 \times 10^{-2}$ | --                     | $3.88 \times 10^{-7}$ | --                          | $1.05 \times 10^{-7}$  | --                      | $8.71 \times 10^{-5}$ | --                     |
|                       |           | <i>p</i> -value | < 0.001               | --                     | < 0.001               | --                     | < 0.001               | --                          | < 0.001                | --                      | < 0.001               | --                     |

|                                         |           |                 |                       |                        |                        |                        |                       |                         |                        |                         |                        |                        |
|-----------------------------------------|-----------|-----------------|-----------------------|------------------------|------------------------|------------------------|-----------------------|-------------------------|------------------------|-------------------------|------------------------|------------------------|
|                                         | Quadratic | Estimate        | $3.94 \times 10^{-1}$ | $-9.90 \times 10^{-3}$ | $1.77 \times 10^{-1}$  | $-3.11 \times 10^{-1}$ | $7.32 \times 10^{-7}$ | $-1.33 \times 10^{-13}$ | $1.50 \times 10^{-7}$  | $-1.83 \times 10^{-14}$ | $-2.11 \times 10^{-4}$ | $5.30 \times 10^{-9}$  |
|                                         |           | <i>p</i> -value | < 0.001               | < 0.001                | < 0.001                | < 0.001                | < 0.001               | < 0.001                 | < 0.001                | < 0.001                 | < 0.001                | < 0.001                |
| Mid-Pliocene<br>(3.3–3.0 Ma)            | Linear    | Estimate        | $3.66 \times 10^{-2}$ | --                     | $1.87 \times 10^{-1}$  | --                     | $1.54 \times 10^{-6}$ | --                      | $-1.62 \times 10^{-7}$ | --                      | $1.20 \times 10^{-4}$  | --                     |
|                                         |           | <i>p</i> -value | < 0.001               | --                     | < 0.001                | --                     | < 0.001               | --                      | < 0.001                | --                      | < 0.001                | --                     |
|                                         | Quadratic | Estimate        | $1.43 \times 10^{-1}$ | $-4.23 \times 10^{-3}$ | $1.78 \times 10^{-1}$  | $-3.00 \times 10^{-2}$ | $3.87 \times 10^{-6}$ | $-2.16 \times 10^{-12}$ | $2.53 \times 10^{-8}$  | $-3.59 \times 10^{-15}$ | $2.20 \times 10^{-4}$  | $-1.42 \times 10^{-8}$ |
|                                         |           | <i>p</i> -value | < 0.001               | < 0.001                | < 0.001                | < 0.001                | < 0.001               | < 0.001                 | < 0.001                | 0.14                    | < 0.001                | < 0.001                |
| Last Glacial Maximum<br>(LGM, 22–18 ka) | Linear    | Estimate        | $7.04 \times 10^{-2}$ | --                     | $1.07 \times 10^{-1}$  | --                     | $1.19 \times 10^{-6}$ | --                      | $2.25 \times 10^{-7}$  | --                      | $-5.49 \times 10^{-5}$ | --                     |
|                                         |           | <i>p</i> -value | < 0.001               | --                     | < 0.001                | --                     | < 0.001               | --                      | < 0.001                | --                      | < 0.001                | --                     |
|                                         | Quadratic | Estimate        | $6.88 \times 10^{-2}$ | $-1.16 \times 10^{-3}$ | $-3.17 \times 10^{-1}$ | $-1.08 \times 10^{-1}$ | $3.86 \times 10^{-6}$ | $-2.54 \times 10^{-12}$ | $-9.89 \times 10^{-9}$ | $-5.62 \times 10^{-14}$ | $5.59 \times 10^{-5}$  | $-5.16 \times 10^{-9}$ |
|                                         |           | <i>p</i> -value | < 0.001               | < 0.001                | < 0.001                | < 0.001                | < 0.001               | < 0.001                 | 0.38                   | < 0.001                 | < 0.001                | < 0.001                |

330 **Table S20 | Summary of the Generalised Additive Models (GAMs) with species turnover as**  
331 **the response variable and climate and its deep-time geographic dynamics as explanatory**  
332 **variables for all recent climatic conditions across multiple climatic space resolutions.**  
333 Summary statistics of GAMs fitted with turnover component of  $\beta$ -diversity as the response variable.  
334 Explanatory variables include:  $T_m$  ( $^{\circ}\text{C}$ ), recent (1901–1989) temperature index;  $\ln$  MI (unitless),  
335 recent natural-log-transformed moisture index; Recent Area ( $\text{km}^2$ ), total land area occupied by a  
336 climatic condition in the recent period;  $\Delta$ Area ( $\text{km}^2$ ), change in total land area occupied by a climatic  
337 condition from its earliest occurrence to the recent period; Movement (km), geographic shift of a  
338 climatic condition since its earliest occurrence to the recent period. Different GAMs were  
339 constructed based on climatic spaces defined by the recent climatic conditions ( $T_m$  and  $\ln$  MI) at four  
340 resolutions, with each climatic axis divided into 30, 40, 50 or 60 equal intervals. Reported metrics  
341 for each model include concurvity,  $\chi^2$  and  $p$ -value for each explanatory variable, and explained  
342 deviance (Deviance), predicted  $R^2$  ( $R_{\text{pred}}^2$ ) and adjusted  $R^2$  ( $R_{\text{adj}}^2$ ) of each GAM model, and the  
343 sample size (N) fitted into each model.

| 30 equal interval resolution |            |          |            |          |                     |                    |     |
|------------------------------|------------|----------|------------|----------|---------------------|--------------------|-----|
| Predictor                    | Concurvity | $\chi^2$ | $p$ -value | Deviance | $R_{\text{pred}}^2$ | $R_{\text{adj}}^2$ | N   |
| $T_m$                        | 0.65       | 63.00    | < 0.001    |          |                     |                    |     |
| $\ln$ MI                     | 0.54       | 7.31     | 0.11       |          |                     |                    |     |
| Recent Area                  | 0.84       | 122.41   | < 0.001    | 0.74     | 0.77                | 0.75               | 297 |
| $\Delta$ Area                | 0.63       | 2.28     | 0.13       |          |                     |                    |     |
| Movement                     | 0.46       | 61.57    | < 0.001    |          |                     |                    |     |
| 40 equal interval resolution |            |          |            |          |                     |                    |     |
| Predictor                    | Concurvity | $\chi^2$ | $p$ -value | Deviance | $R_{\text{pred}}^2$ | $R_{\text{adj}}^2$ | N   |
| $T_m$                        | 0.66       | 114.00   | < 0.001    |          |                     |                    |     |
| $\ln$ MI                     | 0.51       | 17.04    | < 0.05     |          |                     |                    |     |
| Recent Area                  | 0.76       | 159.96   | < 0.001    | 0.72     | 0.75                | 0.73               | 464 |
| $\Delta$ Area                | 0.55       | 7.96     | < 0.001    |          |                     |                    |     |

| Movement                     | 0.49       | 93.95    | < 0.001         |          |                     |                    |     |
|------------------------------|------------|----------|-----------------|----------|---------------------|--------------------|-----|
| 50 equal interval resolution |            |          |                 |          |                     |                    |     |
| Predictor                    | Concurvity | $\chi^2$ | <i>p</i> -value | Deviance | $R_{\text{pred}}^2$ | $R_{\text{adj}}^2$ | N   |
| $T_m$                        | 0.67       | 107.91   | < 0.001         |          |                     |                    |     |
| ln MI                        | 0.55       | 18.51    | < 0.01          |          |                     |                    |     |
| Recent Area                  | 0.76       | 119.50   | < 0.001         | 0.64     | 0.65                | 0.63               | 638 |
| $\Delta$ Area                | 0.58       | 14.60    | < 0.001         |          |                     |                    |     |
| Movement                     | 0.49       | 58.31    | < 0.001         |          |                     |                    |     |
| 60 equal interval resolution |            |          |                 |          |                     |                    |     |
| Predictor                    | Concurvity | $\chi^2$ | <i>p</i> -value | Deviance | $R_{\text{pred}}^2$ | $R_{\text{adj}}^2$ | N   |
| $T_m$                        | 0.66       | 127.13   | < 0.001         |          |                     |                    |     |
| ln MI                        | 0.53       | 40.57    | < 0.001         |          |                     |                    |     |
| Recent Area                  | 0.77       | 94.97    | < 0.001         | 0.57     | 0.63                | 0.62               | 830 |
| $\Delta$ Area                | 0.57       | 2.57     | 0.14            |          |                     |                    |     |
| Movement                     | 0.46       | 70.44    | < 0.001         |          |                     |                    |     |

344 **Table S21 | Summary of the Generalised Additive Models (GAMs) with species turnover as**  
 345 **the response variable and climate and its deep-time geographic dynamics as explanatory**  
 346 **variables for recent climatic conditions that first appeared in the Eocene (ca. 50 Ma), across**  
 347 **multiple climatic space resolutions.** Summary statistics of GAMs fitted with turnover component  
 348 of  $\beta$ -diversity as the response variable. Explanatory variables include:  $T_m$  ( $^{\circ}\text{C}$ ), recent (1901–1989)  
 349 temperature index; ln MI (unitless), recent natural-log-transformed moisture index; Recent Area  
 350 ( $\text{km}^2$ ), total land area occupied by a climatic condition in the recent period;  $\Delta$ Area ( $\text{km}^2$ ), change in  
 351 total land area occupied by a climatic condition from its earliest occurrence (i.e. Eocene) to the  
 352 recent period; Movement (km), geographic shift of a climatic condition since its earliest occurrence  
 353 (i.e. Eocene) to the recent period. Different GAMs were constructed based on climatic spaces  
 354 defined by the recent climatic conditions ( $T_m$  and ln MI) at four resolutions, with each climatic axis  
 355 divided into 30, 40, 50 or 60 equal intervals. Reported metrics for each model include concurvity,  $\chi^2$

356 and  $p$ -value for each explanatory variable, and explained deviance (Deviance), predicted  $R^2$  ( $R_{\text{pred}}^2$ )  
 357 and adjusted  $R^2$  ( $R_{\text{adj}}^2$ ) of each GAM model, and the sample size (N) fitted into each model.

| 30 equal interval resolution |            |          |            |          |                     |                    |     |
|------------------------------|------------|----------|------------|----------|---------------------|--------------------|-----|
| Predictor                    | Concurvity | $\chi^2$ | $p$ -value | Deviance | $R_{\text{pred}}^2$ | $R_{\text{adj}}^2$ | N   |
| $T_m$                        | 0.78       | 14.00    | < 0.05     |          |                     |                    |     |
| In MI                        | 0.85       | 15.94    | < 0.001    |          |                     |                    |     |
| Recent Area                  | 0.91       | 61.21    | < 0.001    | 0.89     | 0.86                | 0.82               | 82  |
| $\Delta$ Area                | 0.80       | 0.63     | 0.43       |          |                     |                    |     |
| Movement                     | 0.73       | 19.84    | < 0.001    |          |                     |                    |     |
| 40 equal interval resolution |            |          |            |          |                     |                    |     |
| Predictor                    | Concurvity | $\chi^2$ | $p$ -value | Deviance | $R_{\text{pred}}^2$ | $R_{\text{adj}}^2$ | N   |
| $T_m$                        | 0.77       | 81.62    | < 0.001    |          |                     |                    |     |
| In MI                        | 0.86       | 9.20     | < 0.05     |          |                     |                    |     |
| Recent Area                  | 0.87       | 49.77    | < 0.001    | 0.77     | 0.76                | 0.71               | 127 |
| $\Delta$ Area                | 0.75       | 1.83     | 0.31       |          |                     |                    |     |
| Movement                     | 0.74       | 18.76    | < 0.001    |          |                     |                    |     |
| 50 equal interval resolution |            |          |            |          |                     |                    |     |
| Predictor                    | Concurvity | $\chi^2$ | $p$ -value | Deviance | $R_{\text{pred}}^2$ | $R_{\text{adj}}^2$ | N   |
| $T_m$                        | 0.72       | 22.73    | < 0.001    |          |                     |                    |     |
| In MI                        | 0.82       | 1.43     | 0.23       |          |                     |                    |     |
| Recent Area                  | 0.82       | 45.56    | < 0.001    | 0.52     | 0.60                | 0.54               | 184 |
| $\Delta$ Area                | 0.71       | 3.20     | 0.07       |          |                     |                    |     |
| Movement                     | 0.65       | 9.09     | < 0.001    |          |                     |                    |     |
| 60 equal interval resolution |            |          |            |          |                     |                    |     |
| Predictor                    | Concurvity | $\chi^2$ | $p$ -value | Deviance | $R_{\text{pred}}^2$ | $R_{\text{adj}}^2$ | N   |
| $T_m$                        | 0.72       | 63.45    | < 0.001    |          |                     |                    |     |
| In MI                        | 0.79       | 6.74     | 0.13       | 0.60     | 0.66                | 0.61               | 236 |
| Recent Area                  | 0.85       | 21.21    | < 0.001    |          |                     |                    |     |



|               |      |       |         |
|---------------|------|-------|---------|
| $\Delta$ Area | 0.73 | 0.05  | 0.82    |
| Movement      | 0.54 | 43.59 | < 0.001 |

358 **Table S22 | Summary of the Generalised Additive Models (GAMs) with species turnover as**  
359 **the response variable and climate and its deep-time geographic dynamics as explanatory**  
360 **variables for recent climatic conditions that first appeared in the Mid-Pliocene (3.3–3.0 Ma),**  
361 **across multiple climatic space resolutions.** Summary statistics of GAMs fitted with turnover  
362 component of  $\beta$ -diversity as the response variable. Explanatory variables include:  $T_m$  ( $^{\circ}\text{C}$ ), recent  
363 (1901–1989) temperature index;  $\ln$  MI (unitless), recent natural-log-transformed moisture index;  
364 Recent Area ( $\text{km}^2$ ), total land area occupied by a climatic condition in the recent period;  $\Delta$ Area ( $\text{km}^2$ ),  
365 change in total land area occupied by a climatic condition from its earliest occurrence (i.e.  
366 Mid-Pliocene) to the recent period; Movement (km), geographic shift of a climatic condition since its  
367 earliest occurrence (i.e. Mid-Pliocene) to the recent period. Different GAMs were constructed based  
368 on climatic spaces defined by the recent climatic conditions ( $T_m$  and  $\ln$  MI) at four resolutions, with  
369 each climatic axis divided into 30, 40, 50 or 60 equal intervals. Reported metrics for each model  
370 include concurvity,  $\chi^2$  and  $p$ -value for each explanatory variable, and explained deviance (Deviance),  
371 predicted  $R^2$  ( $R_{\text{pred}}^2$ ) and adjusted  $R^2$  ( $R_{\text{adj}}^2$ ) of each GAM model, and the sample size (N) fitted into  
372 each model.

| 30 equal interval resolution |            |          |            |          |                     |                    |     |
|------------------------------|------------|----------|------------|----------|---------------------|--------------------|-----|
| Predictor                    | Concurvity | $\chi^2$ | $p$ -value | Deviance | $R_{\text{pred}}^2$ | $R_{\text{adj}}^2$ | N   |
| $T_m$                        | 0.80       | 10.01    | < 0.05     |          |                     |                    |     |
| $\ln$ MI                     | 0.75       | 12.77    | < 0.01     |          |                     |                    |     |
| Recent Area                  | 0.82       | 46.59    | < 0.001    | 0.76     | 0.77                | 0.74               | 128 |
| $\Delta$ Area                | 0.63       | 0.89     | 0.66       |          |                     |                    |     |
| Movement                     | 0.52       | 33.66    | < 0.001    |          |                     |                    |     |
| 40 equal interval resolution |            |          |            |          |                     |                    |     |
| Predictor                    | Concurvity | $\chi^2$ | $p$ -value | Deviance | $R_{\text{pred}}^2$ | $R_{\text{adj}}^2$ | N   |
| $T_m$                        | 0.80       | 47.19    | < 0.001    | 0.85     | 0.84                | 0.82               | 198 |

| In MI                        | 0.68       | 71.69    | < 0.001         |          |                     |                    |     |
|------------------------------|------------|----------|-----------------|----------|---------------------|--------------------|-----|
| Recent Area                  | 0.82       | 15.10    | < 0.001         |          |                     |                    |     |
| $\Delta$ Area                | 0.65       | 4.91     | 0.10            |          |                     |                    |     |
| Movement                     | 0.49       | 68.29    | < 0.001         |          |                     |                    |     |
| 50 equal interval resolution |            |          |                 |          |                     |                    |     |
| Predictor                    | Concurvity | $\chi^2$ | <i>p</i> -value | Deviance | $R_{\text{pred}}^2$ | $R_{\text{adj}}^2$ | N   |
| $T_m$                        | 0.76       | 2.36     | 0.12            |          |                     |                    |     |
| In MI                        | 0.67       | 27.29    | < 0.001         |          |                     |                    |     |
| Recent Area                  | 0.74       | 40.08    | < 0.001         | 0.61     | 0.63                | 0.60               | 267 |
| $\Delta$ Area                | 0.60       | 1.12     | 0.29            |          |                     |                    |     |
| Movement                     | 0.45       | 68.67    | < 0.001         |          |                     |                    |     |
| 60 equal interval resolution |            |          |                 |          |                     |                    |     |
| Predictor                    | Concurvity | $\chi^2$ | <i>p</i> -value | Deviance | $R_{\text{pred}}^2$ | $R_{\text{adj}}^2$ | N   |
| $T_m$                        | 0.75       | 0.56     | 0.54            |          |                     |                    |     |
| In MI                        | 0.67       | 54.01    | < 0.001         |          |                     |                    |     |
| Recent Area                  | 0.85       | 32.17    | < 0.001         | 0.59     | 0.60                | 0.58               | 368 |
| $\Delta$ Area                | 0.67       | 0.92     | 0.34            |          |                     |                    |     |
| Movement                     | 0.42       | 115.65   | < 0.001         |          |                     |                    |     |

373 **Table S23 | Summary of the Generalised Additive Models (GAMs) with species turnover as**  
 374 **the response variable and climate and its deep-time geographic dynamics as explanatory**  
 375 **variables for recent climatic conditions that first appeared in the Last Glacial Maximum (LGM,**  
 376 **22–18 ka), across multiple climatic space resolutions.** Summary statistics of GAMs fitted with  
 377 turnover component of  $\beta$ -diversity as the response variable. Explanatory variables include:  $T_m$  ( $^{\circ}\text{C}$ ),  
 378 recent (1901–1989) temperature index; In MI (unitless), recent natural-log-transformed moisture  
 379 index; Recent Area ( $\text{km}^2$ ), total land area occupied by a climatic condition in the recent period;  
 380  $\Delta$ Area ( $\text{km}^2$ ), change in total land area occupied by a climatic condition from its earliest occurrence  
 381 (i.e. LGM) to the recent period; Movement (km), geographic shift of a climatic condition since its  
 382 earliest occurrence (i.e. LGM) to the recent period. Different GAMs were constructed based on

383 climatic spaces defined by the recent climatic conditions ( $T_m$  and  $\ln MI$ ) at four resolutions, with  
 384 each climatic axis divided into 30, 40, 50 or 60 equal intervals. Reported metrics for each model  
 385 include concurvity,  $\chi^2$  and  $p$ -value for each explanatory variable, and explained deviance (Deviance),  
 386 predicted  $R^2$  ( $R_{pred}^2$ ) and adjusted  $R^2$  ( $R_{adj}^2$ ) of each GAM model, and the sample size ( $N$ ) fitted into  
 387 each model.

| 30 equal interval resolution |            |          |            |          |              |             |     |
|------------------------------|------------|----------|------------|----------|--------------|-------------|-----|
| Predictor                    | Concurvity | $\chi^2$ | $p$ -value | Deviance | $R_{pred}^2$ | $R_{adj}^2$ | N   |
| $T_m$                        | 0.88       | 10.47    | 0.07       |          |              |             |     |
| $\ln MI$                     | 0.85       | 22.07    | < 0.001    |          |              |             |     |
| Recent Area                  | 0.85       | 67.36    | < 0.001    | 0.83     | 0.83         | 0.80        | 78  |
| $\Delta Area$                | 0.58       | 10.75    | < 0.001    |          |              |             |     |
| Movement                     | 0.60       | 17.49    | < 0.001    |          |              |             |     |
| 40 equal interval resolution |            |          |            |          |              |             |     |
| Predictor                    | Concurvity | $\chi^2$ | $p$ -value | Deviance | $R_{pred}^2$ | $R_{adj}^2$ | N   |
| $T_m$                        | 0.91       | 14.54    | < 0.05     |          |              |             |     |
| $\ln MI$                     | 0.84       | 10.54    | < 0.05     |          |              |             |     |
| Recent Area                  | 0.90       | 60.04    | < 0.001    | 0.78     | 0.80         | 0.77        | 117 |
| $\Delta Area$                | 0.68       | 0.78     | 0.38       |          |              |             |     |
| Movement                     | 0.56       | 6.53     | < 0.05     |          |              |             |     |
| 50 equal interval resolution |            |          |            |          |              |             |     |
| Predictor                    | Concurvity | $\chi^2$ | $p$ -value | Deviance | $R_{pred}^2$ | $R_{adj}^2$ | N   |
| $T_m$                        | 0.89       | 32.01    | < 0.001    |          |              |             |     |
| $\ln MI$                     | 0.79       | 19.57    | < 0.001    |          |              |             |     |
| Recent Area                  | 0.87       | 106.63   | < 0.001    | 0.79     | 0.80         | 0.77        | 160 |
| $\Delta Area$                | 0.65       | 6.32     | < 0.05     |          |              |             |     |
| Movement                     | 0.38       | 25.18    | < 0.001    |          |              |             |     |
| 60 equal interval resolution |            |          |            |          |              |             |     |

| Predictor     | Concurvity | $\chi^2$ | $p$ -value | Deviance | $R_{\text{pred}}^2$ | $R_{\text{adj}}^2$ | N   |
|---------------|------------|----------|------------|----------|---------------------|--------------------|-----|
| $T_m$         | 0.88       | 37.93    | < 0.001    |          |                     |                    |     |
| ln MI         | 0.77       | 42.87    | < 0.001    |          |                     |                    |     |
| Recent Area   | 0.87       | 58.25    | < 0.001    | 0.81     | 0.78                | 0.75               | 194 |
| $\Delta$ Area | 0.63       | 5.23     | < 0.05     |          |                     |                    |     |
| Movement      | 0.34       | 31.93    | < 0.001    |          |                     |                    |     |

**Table S24 | Summary of the Generalised Additive Models (GAMs) with phylogenetic diversity as the response variable and climate and its deep-time geographic dynamics as explanatory variables for all recent climatic conditions across multiple climatic space resolutions.**

Summary statistics of GAMs fitted with Faith's phylogenetic diversity<sup>2</sup> as the response variable. Explanatory variables include:  $T_m$  (°C), recent (1901–1989) temperature index; ln MI (unitless), recent natural-log-transformed moisture index; Recent Area (km<sup>2</sup>), total land area occupied by a climatic condition in the recent period;  $\Delta$ Area (km<sup>2</sup>), change in total land area occupied by a climatic condition from its earliest occurrence to the recent period; Movement (km), geographic shift of a climatic condition since its earliest occurrence to the recent period. Different GAMs were constructed based on climatic spaces defined by the recent climatic conditions ( $T_m$  and ln MI) at four resolutions, with each climatic axis divided into 30, 40, 50 or 60 equal intervals. Reported metrics for each model include concurvity,  $\chi^2$  and  $p$ -value for each explanatory variable, and explained deviance (Deviance), predicted  $R^2$  ( $R_{\text{pred}}^2$ ) and adjusted  $R^2$  ( $R_{\text{adj}}^2$ ) of each GAM model, and the sample size (N) fitted into each model.

| 30 equal interval resolution |            |          |            |          |                     |                    |     |
|------------------------------|------------|----------|------------|----------|---------------------|--------------------|-----|
| Predictor                    | Concurvity | $\chi^2$ | $p$ -value | Deviance | $R_{\text{pred}}^2$ | $R_{\text{adj}}^2$ | N   |
| $T_m$                        | 0.64       | 197.55   | < 0.001    |          |                     |                    |     |
| ln MI                        | 0.56       | 139.60   | < 0.001    |          |                     |                    |     |
| Recent Area                  | 0.84       | 48.21    | < 0.001    | 0.85     | 0.85                | 0.84               | 333 |
| $\Delta$ Area                | 0.62       | 41.54    | < 0.001    |          |                     |                    |     |
| Movement                     | 0.41       | 37.37    | < 0.001    |          |                     |                    |     |

| 40 equal interval resolution |            |          |            |          |                     |                    |     |
|------------------------------|------------|----------|------------|----------|---------------------|--------------------|-----|
| Predictor                    | Concurvity | $\chi^2$ | $p$ -value | Deviance | $R_{\text{pred}}^2$ | $R_{\text{adj}}^2$ | N   |
| $T_m$                        | 0.61       | 325.36   | < 0.001    |          |                     |                    |     |
| ln MI                        | 0.53       | 237.09   | < 0.001    |          |                     |                    |     |
| Recent Area                  | 0.76       | 55.06    | < 0.001    | 0.83     | 0.83                | 0.82               | 516 |
| $\Delta$ Area                | 0.55       | 41.80    | < 0.001    |          |                     |                    |     |
| Movement                     | 0.42       | 40.35    | < 0.001    |          |                     |                    |     |
| 50 equal interval resolution |            |          |            |          |                     |                    |     |
| Predictor                    | Concurvity | $\chi^2$ | $p$ -value | Deviance | $R_{\text{pred}}^2$ | $R_{\text{adj}}^2$ | N   |
| $T_m$                        | 0.67       | 382.79   | < 0.001    |          |                     |                    |     |
| ln MI                        | 0.49       | 247.36   | < 0.001    |          |                     |                    |     |
| Recent Area                  | 0.76       | 86.85    | < 0.001    | 0.82     | 0.82                | 0.81               | 734 |
| $\Delta$ Area                | 0.55       | 40.24    | < 0.001    |          |                     |                    |     |
| Movement                     | 0.40       | 57.51    | < 0.001    |          |                     |                    |     |
| 60 equal interval resolution |            |          |            |          |                     |                    |     |
| Predictor                    | Concurvity | $\chi^2$ | $p$ -value | Deviance | $R_{\text{pred}}^2$ | $R_{\text{adj}}^2$ | N   |
| $T_m$                        | 0.63       | 472.51   | < 0.001    |          |                     |                    |     |
| ln MI                        | 0.47       | 340.21   | < 0.001    |          |                     |                    |     |
| Recent Area                  | 0.77       | 133.54   | < 0.001    | 0.81     | 0.81                | 0.81               | 968 |
| $\Delta$ Area                | 0.56       | 54.97    | < 0.001    |          |                     |                    |     |
| Movement                     | 0.39       | 102.72   | < 0.001    |          |                     |                    |     |

402 **Table S25 | Summary of the Generalised Additive Models (GAMs) with phylogenetic diversity**  
 403 **as the response variable and climate and its deep-time geographic dynamics as explanatory**  
 404 **variables for recent climatic conditions that first appeared in the Eocene (ca. 50 Ma), across**  
 405 **multiple climatic space resolutions.** Summary statistics of GAMs fitted with Faith's phylogenetic  
 406 diversity<sup>2</sup> as the response variable. Explanatory variables include:  $T_m$  (°C), recent (1901–1989)  
 407 temperature index; ln MI (unitless), recent natural-log-transformed moisture index; Recent Area  
 408 (km<sup>2</sup>), total land area occupied by a climatic condition in the recent period;  $\Delta$ Area (km<sup>2</sup>), change in

total land area occupied by a climatic condition from its earliest occurrence (i.e. Eocene) to the recent period; Movement (km), geographic shift of a climatic condition since its earliest occurrence (i.e. Eocene) to the recent period. Different GAMs were constructed based on climatic spaces defined by the recent climatic conditions ( $T_m$  and  $\ln MI$ ) at four resolutions, with each climatic axis divided into 30, 40, 50 or 60 equal intervals. Reported metrics for each model include concurvity,  $\chi^2$  and  $p$ -value for each explanatory variable, and explained deviance (Deviance), predicted  $R^2$  ( $R_{pred}^2$ ) and adjusted  $R^2$  ( $R_{adj}^2$ ) of each GAM model, and the sample size (N) fitted into each model.

| 30 equal interval resolution |            |          |            |          |              |             |     |
|------------------------------|------------|----------|------------|----------|--------------|-------------|-----|
| Predictor                    | Concurvity | $\chi^2$ | $p$ -value | Deviance | $R_{pred}^2$ | $R_{adj}^2$ | N   |
| $T_m$                        | 0.76       | 92.73    | < 0.001    |          |              |             |     |
| $\ln MI$                     | 0.86       | 130.50   | < 0.001    |          |              |             |     |
| Recent Area                  | 0.91       | 10.64    | < 0.05     | 0.94     | 0.94         | 0.92        | 87  |
| $\Delta Area$                | 0.79       | 10.77    | < 0.05     |          |              |             |     |
| Movement                     | 0.66       | 0.10     | 0.88       |          |              |             |     |
| 40 equal interval resolution |            |          |            |          |              |             |     |
| Predictor                    | Concurvity | $\chi^2$ | $p$ -value | Deviance | $R_{pred}^2$ | $R_{adj}^2$ | N   |
| $T_m$                        | 0.75       | 89.69    | < 0.001    |          |              |             |     |
| $\ln MI$                     | 0.82       | 114.57   | < 0.001    |          |              |             |     |
| Recent Area                  | 0.87       | 60.67    | < 0.001    | 0.90     | 0.90         | 0.88        | 136 |
| $\Delta Area$                | 0.72       | 0.20     | 0.65       |          |              |             |     |
| Movement                     | 0.66       | 1.01     | 0.40       |          |              |             |     |
| 50 equal interval resolution |            |          |            |          |              |             |     |
| Predictor                    | Concurvity | $\chi^2$ | $p$ -value | Deviance | $R_{pred}^2$ | $R_{adj}^2$ | N   |
| $T_m$                        | 0.70       | 99.30    | < 0.001    |          |              |             |     |
| $\ln MI$                     | 0.80       | 130.64   | < 0.001    |          |              |             |     |
| Recent Area                  | 0.83       | 83.61    | < 0.001    | 0.89     | 0.89         | 0.87        | 194 |
| $\Delta Area$                | 0.70       | 1.58     | 0.21       |          |              |             |     |
| Movement                     | 0.59       | 3.99     | 0.09       |          |              |             |     |

| 60 equal interval resolution |            |          |            |          |                     |                    |     |
|------------------------------|------------|----------|------------|----------|---------------------|--------------------|-----|
| Predictor                    | Concurvity | $\chi^2$ | $p$ -value | Deviance | $R_{\text{pred}}^2$ | $R_{\text{adj}}^2$ | N   |
| $T_m$                        | 0.66       | 127.88   | < 0.001    |          |                     |                    |     |
| ln MI                        | 0.77       | 166.98   | < 0.001    |          |                     |                    |     |
| Recent Area                  | 0.85       | 95.08    | < 0.001    | 0.87     | 0.87                | 0.86               | 257 |
| $\Delta$ Area                | 0.72       | 3.04     | 0.08       |          |                     |                    |     |
| Movement                     | 0.46       | 5.36     | 0.22       |          |                     |                    |     |

416 **Table S26 | Summary of the Generalised Additive Models (GAMs) with phylogenetic diversity**  
 417 **as the response variable and climate and its deep-time geographic dynamics as explanatory**  
 418 **variables for recent climatic conditions that first appeared in the Mid-Pliocene (3.3–3.0 Ma),**  
 419 **across multiple climatic space resolutions.** Summary statistics of GAMs fitted with Faith's  
 420 phylogenetic diversity<sup>2</sup> as the response variable. Explanatory variables include:  $T_m$  (°C), recent  
 421 (1901–1989) temperature index; ln MI (unitless), recent natural-log-transformed moisture index;  
 422 Recent Area (km<sup>2</sup>), total land area occupied by a climatic condition in the recent period;  $\Delta$ Area (km<sup>2</sup>),  
 423 change in total land area occupied by a climatic condition from its earliest occurrence (i.e.  
 424 Mid-Pliocene) to the recent period; Movement (km), geographic shift of a climatic condition since its  
 425 earliest occurrence (i.e. Mid-Pliocene) to the recent period. Different GAMs were constructed based  
 426 on climatic spaces defined by the recent climatic conditions ( $T_m$  and ln MI) at four resolutions, with  
 427 each climatic axis divided into 30, 40, 50 or 60 equal intervals. Reported metrics for each model  
 428 include concurvity,  $\chi^2$  and  $p$ -value for each explanatory variable, and explained deviance (Deviance),  
 429 predicted  $R^2$  ( $R_{\text{pred}}^2$ ) and adjusted  $R^2$  ( $R_{\text{adj}}^2$ ) of each GAM model, and the sample size (N) fitted into  
 430 each model.

| 30 equal interval resolution |            |          |            |          |                     |                    |     |
|------------------------------|------------|----------|------------|----------|---------------------|--------------------|-----|
| Predictor                    | Concurvity | $\chi^2$ | $p$ -value | Deviance | $R_{\text{pred}}^2$ | $R_{\text{adj}}^2$ | N   |
| $T_m$                        | 0.74       | 73.23    | < 0.001    |          |                     |                    |     |
| ln MI                        | 0.69       | 53.54    | < 0.001    | 0.83     | 0.83                | 0.81               | 140 |
| Recent Area                  | 0.56       | 119.42   | < 0.001    |          |                     |                    |     |

| $\Delta$ Area                | 0.22       | 4.61     | 0.13            |          |                     |                    |     |
|------------------------------|------------|----------|-----------------|----------|---------------------|--------------------|-----|
| Movement                     | 0.48       | 8.07     | < 0.05          |          |                     |                    |     |
| 40 equal interval resolution |            |          |                 |          |                     |                    |     |
| Predictor                    | Concurvity | $\chi^2$ | <i>p</i> -value | Deviance | $R_{\text{pred}}^2$ | $R_{\text{adj}}^2$ | N   |
| $T_m$                        | 0.78       | 253.68   | < 0.001         |          |                     |                    |     |
| In MI                        | 0.65       | 223.38   | < 0.001         |          |                     |                    |     |
| Recent Area                  | 0.81       | 48.73    | < 0.001         | 0.88     | 0.88                | 0.86               | 210 |
| $\Delta$ Area                | 0.61       | 2.53     | 0.40            |          |                     |                    |     |
| Movement                     | 0.45       | 0.82     | 0.37            |          |                     |                    |     |
| 50 equal interval resolution |            |          |                 |          |                     |                    |     |
| Predictor                    | Concurvity | $\chi^2$ | <i>p</i> -value | Deviance | $R_{\text{pred}}^2$ | $R_{\text{adj}}^2$ | N   |
| $T_m$                        | 0.74       | 392.41   | < 0.001         |          |                     |                    |     |
| In MI                        | 0.64       | 320.08   | < 0.001         |          |                     |                    |     |
| Recent Area                  | 0.71       | 31.27    | < 0.001         | 0.85     | 0.85                | 0.84               | 305 |
| $\Delta$ Area                | 0.52       | 28.10    | < 0.001         |          |                     |                    |     |
| Movement                     | 0.42       | 3.24     | 0.24            |          |                     |                    |     |
| 60 equal interval resolution |            |          |                 |          |                     |                    |     |
| Predictor                    | Concurvity | $\chi^2$ | <i>p</i> -value | Deviance | $R_{\text{pred}}^2$ | $R_{\text{adj}}^2$ | N   |
| $T_m$                        | 0.73       | 266.27   | < 0.001         |          |                     |                    |     |
| In MI                        | 0.63       | 236.90   | < 0.001         |          |                     |                    |     |
| Recent Area                  | 0.84       | 69.56    | < 0.001         | 0.81     | 0.81                | 0.80               | 407 |
| $\Delta$ Area                | 0.64       | 13.99    | < 0.01          |          |                     |                    |     |
| Movement                     | 0.39       | 8.88     | < 0.05          |          |                     |                    |     |

431 **Table S27 | Summary of the Generalised Additive Models (GAMs) with phylogenetic diversity**  
 432 **as the response variable and climate and its deep-time geographic dynamics as explanatory**  
 433 **variables for recent climatic conditions that first appeared in the Last Glacial Maximum (LGM,**  
 434 **22–18 ka), across multiple climatic space resolutions.** Summary statistics of GAMs fitted with  
 435 Faith's phylogenetic diversity<sup>2</sup> as the response variable. Explanatory variables include:  $T_m$  (°C),



436 recent (1901–1989) temperature index;  $\ln$  MI (unitless), recent natural-log-transformed moisture  
 437 index; Recent Area (km<sup>2</sup>), total land area occupied by a climatic condition in the recent period;  
 438  $\Delta$ Area (km<sup>2</sup>), change in total land area occupied by a climatic condition from its earliest occurrence  
 439 (i.e. LGM) to the recent period; Movement (km), geographic shift of a climatic condition since its  
 440 earliest occurrence (i.e. LGM) to the recent period. Different GAMs were constructed based on  
 441 climatic spaces defined by the recent climatic conditions ( $T_m$  and  $\ln$  MI) at four resolutions, with  
 442 each climatic axis divided into 30, 40, 50 or 60 equal intervals. Reported metrics for each model  
 443 include concurvity,  $\chi^2$  and  $p$ -value for each explanatory variable, and explained deviance (Deviance),  
 444 predicted  $R^2$  ( $R_{pred}^2$ ) and adjusted  $R^2$  ( $R_{adj}^2$ ) of each GAM model, and the sample size (N) fitted into  
 445 each model.

| 30 equal interval resolution |            |          |            |          |              |             |     |
|------------------------------|------------|----------|------------|----------|--------------|-------------|-----|
| Predictor                    | Concurvity | $\chi^2$ | $p$ -value | Deviance | $R_{pred}^2$ | $R_{adj}^2$ | N   |
| $T_m$                        | 0.91       | 60.30    | < 0.001    |          |              |             |     |
| $\ln$ MI                     | 0.88       | 8.68     | 0.05       |          |              |             |     |
| Recent Area                  | 0.95       | 9.26     | < 0.05     | 0.72     | 0.72         | 0.66        | 90  |
| $\Delta$ Area                | 0.72       | 0.00     | 0.99       |          |              |             |     |
| Movement                     | 0.62       | 3.91     | 0.30       |          |              |             |     |
| 40 equal interval resolution |            |          |            |          |              |             |     |
| Predictor                    | Concurvity | $\chi^2$ | $p$ -value | Deviance | $R_{pred}^2$ | $R_{adj}^2$ | N   |
| $T_m$                        | 0.90       | 92.99    | < 0.001    |          |              |             |     |
| $\ln$ MI                     | 0.87       | 7.79     | 0.12       |          |              |             |     |
| Recent Area                  | 0.89       | 31.31    | < 0.001    | 0.77     | 0.77         | 0.73        | 137 |
| $\Delta$ Area                | 0.65       | 0.10     | 0.75       |          |              |             |     |
| Movement                     | 0.61       | 11.60    | < 0.05     |          |              |             |     |
| 50 equal interval resolution |            |          |            |          |              |             |     |
| Predictor                    | Concurvity | $\chi^2$ | $p$ -value | Deviance | $R_{pred}^2$ | $R_{adj}^2$ | N   |
| $T_m$                        | 0.87       | 119.01   | < 0.001    | 0.70     | 0.71         | 0.67        | 187 |

| In MI                               | 0.79       | 8.16     | 0.09            |          |              |             |     |
|-------------------------------------|------------|----------|-----------------|----------|--------------|-------------|-----|
| Recent Area                         | 0.86       | 31.75    | < 0.001         |          |              |             |     |
| $\Delta$ Area                       | 0.64       | 0.57     | 0.45            |          |              |             |     |
| Movement                            | 0.39       | 10.83    | < 0.05          |          |              |             |     |
| <b>60 equal interval resolution</b> |            |          |                 |          |              |             |     |
| Predictor                           | Concurvity | $\chi^2$ | <i>p</i> -value | Deviance | $R_{pred}^2$ | $R_{adj}^2$ | N   |
| $T_m$                               | 0.87       | 181.31   | < 0.001         |          |              |             |     |
| In MI                               | 0.76       | 10.83    | < 0.05          |          |              |             |     |
| Recent Area                         | 0.86       | 68.59    | < 0.001         | 0.74     | 0.74         | 0.72        | 245 |
| $\Delta$ Area                       | 0.59       | 0.77     | 0.38            |          |              |             |     |
| Movement                            | 0.31       | 38.22    | < 0.001         |          |              |             |     |

446 **Table S28 | Summary of the Generalised Additive Models (GAMs) with relative phylogenetic**  
 447 **diversity as the response variable and climate and its deep-time geographic dynamics as**  
 448 **explanatory variables for all recent climatic conditions across multiple climatic space**  
 449 **resolutions.** Summary statistics of GAMs fitted with relative phylogenetic diversity (calculated as  
 450 the residuals from regressing phylogenetic diversity against species richness) as the response  
 451 variable. Explanatory variables include:  $T_m$  ( $^{\circ}$ C), recent (1901–1989) temperature index; In MI  
 452 (unitless), recent natural-log-transformed moisture index; Recent Area ( $\text{km}^2$ ), total land area  
 453 occupied by a climatic condition in the recent period;  $\Delta$ Area ( $\text{km}^2$ ), change in total land area  
 454 occupied by a climatic condition from its earliest occurrence to the recent period; Movement (km),  
 455 geographic shift of a climatic condition since its earliest occurrence to the recent period. Different  
 456 GAMs were constructed based on climatic spaces defined by the recent climatic conditions ( $T_m$  and  
 457 In MI) at four resolutions, with each climatic axis divided into 30, 40, 50 or 60 equal intervals.  
 458 Reported metrics for each model include concurvity,  $\chi^2$  and *p*-value for each explanatory variable,  
 459 and explained deviance (Deviance), predicted  $R^2$  ( $R_{pred}^2$ ) and adjusted  $R^2$  ( $R_{adj}^2$ ) of each GAM  
 460 model, and the sample size (N) fitted into each model.

### 30 equal interval resolution

| Predictor                    | Concurvity | $\chi^2$ | $p$ -value | Deviance | $R_{\text{pred}}^2$ | $R_{\text{adj}}^2$ | N   |
|------------------------------|------------|----------|------------|----------|---------------------|--------------------|-----|
| $T_m$                        | 0.64       | 157.07   | < 0.001    |          |                     |                    |     |
| In MI                        | 0.56       | 56.06    | < 0.001    |          |                     |                    |     |
| Recent Area                  | 0.84       | 15.17    | < 0.001    | 0.53     | 0.53                | 0.49               | 333 |
| $\Delta$ Area                | 0.62       | 2.94     | 0.45       |          |                     |                    |     |
| Movement                     | 0.41       | 17.34    | < 0.001    |          |                     |                    |     |
| 40 equal interval resolution |            |          |            |          |                     |                    |     |
| Predictor                    | Concurvity | $\chi^2$ | $p$ -value | Deviance | $R_{\text{pred}}^2$ | $R_{\text{adj}}^2$ | N   |
| $T_m$                        | 0.61       | 250.31   | < 0.001    |          |                     |                    |     |
| In MI                        | 0.53       | 114.22   | < 0.001    |          |                     |                    |     |
| Recent Area                  | 0.76       | 19.89    | < 0.001    | 0.56     | 0.56                | 0.53               | 516 |
| $\Delta$ Area                | 0.55       | 12.51    | < 0.05     |          |                     |                    |     |
| Movement                     | 0.42       | 36.63    | < 0.001    |          |                     |                    |     |
| 50 equal interval resolution |            |          |            |          |                     |                    |     |
| Predictor                    | Concurvity | $\chi^2$ | $p$ -value | Deviance | $R_{\text{pred}}^2$ | $R_{\text{adj}}^2$ | N   |
| $T_m$                        | 0.67       | 383.95   | < 0.001    |          |                     |                    |     |
| In MI                        | 0.49       | 179.03   | < 0.001    |          |                     |                    |     |
| Recent Area                  | 0.76       | 64.01    | < 0.001    | 0.55     | 0.55                | 0.53               | 734 |
| $\Delta$ Area                | 0.55       | 12.45    | < 0.05     |          |                     |                    |     |
| Movement                     | 0.40       | 28.34    | < 0.001    |          |                     |                    |     |
| 60 equal interval resolution |            |          |            |          |                     |                    |     |
| Predictor                    | Concurvity | $\chi^2$ | $p$ -value | Deviance | $R_{\text{pred}}^2$ | $R_{\text{adj}}^2$ | N   |
| $T_m$                        | 0.63       | 478.01   | < 0.001    |          |                     |                    |     |
| In MI                        | 0.47       | 218.37   | < 0.001    |          |                     |                    |     |
| Recent Area                  | 0.77       | 53.55    | < 0.001    | 0.52     | 0.52                | 0.50               | 968 |
| $\Delta$ Area                | 0.56       | 19.31    | < 0.01     |          |                     |                    |     |
| Movement                     | 0.39       | 54.78    | < 0.001    |          |                     |                    |     |

461 **Table S29 | Summary of the Generalised Additive Models (GAMs) with relative phylogenetic**  
 462 **diversity as the response variable and climate and its deep-time geographic dynamics as**  
 463 **explanatory variables for recent climatic conditions that first appeared in the Eocene (ca. 50**  
 464 **Ma), across multiple climatic space resolutions.** Summary statistics of GAMs fitted with relative  
 465 phylogenetic diversity (calculated as the residuals from regressing phylogenetic diversity against  
 466 species richness) as the response variable. Explanatory variables include:  $T_m$  (°C), recent (1901–  
 467 1989) temperature index;  $\ln MI$  (unitless), recent natural-log-transformed moisture index; Recent  
 468 Area (km<sup>2</sup>), total land area occupied by a climatic condition in the recent period;  $\Delta Area$  (km<sup>2</sup>),  
 469 change in total land area occupied by a climatic condition from its earliest occurrence (i.e. Eocene)  
 470 to the recent period; Movement (km), geographic shift of a climatic condition since its earliest  
 471 occurrence (i.e. Eocene) to the recent period. Different GAMs were constructed based on climatic  
 472 spaces defined by the recent climatic conditions ( $T_m$  and  $\ln MI$ ) at four resolutions, with each  
 473 climatic axis divided into 30, 40, 50 or 60 equal intervals. Reported metrics for each model include  
 474 concurvity,  $\chi^2$  and  $p$ -value for each explanatory variable, and explained deviance (Deviance),  
 475 predicted  $R^2$  ( $R_{pred}^2$ ) and adjusted  $R^2$  ( $R_{adj}^2$ ) of each GAM model, and the sample size (N) fitted into  
 476 each model.

| 30 equal interval resolution |            |          |            |          |              |             |     |
|------------------------------|------------|----------|------------|----------|--------------|-------------|-----|
| Predictor                    | Concurvity | $\chi^2$ | $p$ -value | Deviance | $R_{pred}^2$ | $R_{adj}^2$ | N   |
| $T_m$                        | 0.69       | 192.95   | < 0.001    |          |              |             |     |
| $\ln MI$                     | 0.82       | 118.19   | < 0.001    |          |              |             |     |
| Recent Area                  | 0.80       | 11.44    | < 0.05     | 0.81     | 0.81         | 0.78        | 87  |
| $\Delta Area$                | 0.73       | 1.16     | 0.29       |          |              |             |     |
| Movement                     | 0.53       | 7.65     | < 0.05     |          |              |             |     |
| 40 equal interval resolution |            |          |            |          |              |             |     |
| Predictor                    | Concurvity | $\chi^2$ | $p$ -value | Deviance | $R_{pred}^2$ | $R_{adj}^2$ | N   |
| $T_m$                        | 0.75       | 221.22   | < 0.001    |          |              |             |     |
| $\ln MI$                     | 0.82       | 221.46   | < 0.001    | 0.83     | 0.83         | 0.80        | 136 |
| Recent Area                  | 0.87       | 8.93     | 0.06       |          |              |             |     |

| $\Delta$ Area                | 0.72       | 5.32     | 0.20            |          |                     |                    |     |
|------------------------------|------------|----------|-----------------|----------|---------------------|--------------------|-----|
| Movement                     | 0.66       | 3.72     | 0.06            |          |                     |                    |     |
| 50 equal interval resolution |            |          |                 |          |                     |                    |     |
| Predictor                    | Concurvity | $\chi^2$ | <i>p</i> -value | Deviance | $R_{\text{pred}}^2$ | $R_{\text{adj}}^2$ | N   |
| $T_m$                        | 0.70       | 318.68   | < 0.001         |          |                     |                    |     |
| ln MI                        | 0.80       | 232.70   | < 0.001         |          |                     |                    |     |
| Recent Area                  | 0.83       | 15.48    | < 0.001         | 0.77     | 0.77                | 0.74               | 194 |
| $\Delta$ Area                | 0.70       | 0.58     | 0.45            |          |                     |                    |     |
| Movement                     | 0.59       | 2.71     | 0.24            |          |                     |                    |     |
| 60 equal interval resolution |            |          |                 |          |                     |                    |     |
| Predictor                    | Concurvity | $\chi^2$ | <i>p</i> -value | Deviance | $R_{\text{pred}}^2$ | $R_{\text{adj}}^2$ | N   |
| $T_m$                        | 0.66       | 252.31   | < 0.001         |          |                     |                    |     |
| ln MI                        | 0.77       | 157.38   | < 0.001         |          |                     |                    |     |
| Recent Area                  | 0.85       | 5.59     | < 0.05          | 0.69     | 0.69                | 0.66               | 257 |
| $\Delta$ Area                | 0.72       | 9.25     | 0.12            |          |                     |                    |     |
| Movement                     | 0.46       | 1.98     | 0.35            |          |                     |                    |     |

**Table S30 | Summary of the Generalised Additive Models (GAMs) with relative phylogenetic diversity as the response variable and climate and its deep-time geographic dynamics as explanatory variables for recent climatic conditions that first appeared in the Mid-Pliocene (3.3–3.0 Ma), across multiple climatic space resolutions.** Summary statistics of GAMs fitted with relative phylogenetic diversity (calculated as the residuals from regressing phylogenetic diversity against species richness) as the response variable. Explanatory variables include:  $T_m$  ( $^{\circ}\text{C}$ ), recent (1901–1989) temperature index; ln MI (unitless), recent natural-log-transformed moisture index; Recent Area ( $\text{km}^2$ ), total land area occupied by a climatic condition in the recent period;  $\Delta$ Area ( $\text{km}^2$ ), change in total land area occupied by a climatic condition from its earliest occurrence (i.e. Mid-Pliocene) to the recent period; Movement (km), geographic shift of a climatic condition since its earliest occurrence (i.e. Mid-Pliocene) to the recent period. Different GAMs were constructed based on climatic spaces defined by the recent climatic conditions ( $T_m$  and ln MI) at four resolutions, with

each climatic axis divided into 30, 40, 50 or 60 equal intervals. Reported metrics for each model include concurvity,  $\chi^2$  and  $p$ -value for each explanatory variable, and explained deviance (Deviance), predicted  $R^2$  ( $R_{\text{pred}}^2$ ) and adjusted  $R^2$  ( $R_{\text{adj}}^2$ ) of each GAM model, and the sample size (N) fitted into each model.

| 30 equal interval resolution |            |          |            |          |                     |                    |     |
|------------------------------|------------|----------|------------|----------|---------------------|--------------------|-----|
| Predictor                    | Concurvity | $\chi^2$ | $p$ -value | Deviance | $R_{\text{pred}}^2$ | $R_{\text{adj}}^2$ | N   |
| $T_m$                        | 0.79       | 54.18    | < 0.001    |          |                     |                    |     |
| ln MI                        | 0.75       | 69.90    | < 0.001    |          |                     |                    |     |
| Recent Area                  | 0.81       | 5.19     | < 0.05     | 0.73     | 0.73                | 0.69               | 140 |
| $\Delta$ Area                | 0.59       | 36.49    | < 0.001    |          |                     |                    |     |
| Movement                     | 0.51       | 1.17     | 0.28       |          |                     |                    |     |
| 40 equal interval resolution |            |          |            |          |                     |                    |     |
| Predictor                    | Concurvity | $\chi^2$ | $p$ -value | Deviance | $R_{\text{pred}}^2$ | $R_{\text{adj}}^2$ | N   |
| $T_m$                        | 0.78       | 120.94   | < 0.001    |          |                     |                    |     |
| ln MI                        | 0.65       | 105.55   | < 0.001    |          |                     |                    |     |
| Recent Area                  | 0.81       | 17.03    | < 0.001    | 0.74     | 0.74                | 0.71               | 210 |
| $\Delta$ Area                | 0.61       | 42.19    | < 0.001    |          |                     |                    |     |
| Movement                     | 0.45       | 15.69    | < 0.001    |          |                     |                    |     |
| 50 equal interval resolution |            |          |            |          |                     |                    |     |
| Predictor                    | Concurvity | $\chi^2$ | $p$ -value | Deviance | $R_{\text{pred}}^2$ | $R_{\text{adj}}^2$ | N   |
| $T_m$                        | 0.74       | 160.61   | < 0.001    |          |                     |                    |     |
| ln MI                        | 0.64       | 103.56   | < 0.001    |          |                     |                    |     |
| Recent Area                  | 0.71       | 47.79    | < 0.001    | 0.70     | 0.70                | 0.67               | 305 |
| $\Delta$ Area                | 0.52       | 35.96    | < 0.001    |          |                     |                    |     |
| Movement                     | 0.42       | 16.54    | < 0.001    |          |                     |                    |     |
| 60 equal interval resolution |            |          |            |          |                     |                    |     |
| Predictor                    | Concurvity | $\chi^2$ | $p$ -value | Deviance | $R_{\text{pred}}^2$ | $R_{\text{adj}}^2$ | N   |

|                |      |        |         |      |      |      |     |
|----------------|------|--------|---------|------|------|------|-----|
| T <sub>m</sub> | 0.73 | 194.06 | < 0.001 |      |      |      |     |
| ln MI          | 0.63 | 114.24 | < 0.001 |      |      |      |     |
| Recent Area    | 0.84 | 34.78  | < 0.001 | 0.65 | 0.65 | 0.62 | 407 |
| ΔArea          | 0.64 | 52.50  | < 0.001 |      |      |      |     |
| Movement       | 0.39 | 17.71  | < 0.001 |      |      |      |     |

493 **Table S31 | Summary of the Generalised Additive Models (GAMs) with relative phylogenetic**  
 494 **diversity as the response variable and climate and its deep-time geographic dynamics as**  
 495 **explanatory variables for recent climatic conditions that first appeared in the Last Glacial**  
 496 **Maximum (LGM, 22–18 ka), across multiple climatic space resolutions.** Summary statistics of  
 497 GAMs fitted with relative phylogenetic diversity (calculated as the residuals from regressing  
 498 phylogenetic diversity against species richness) as the response variable. Explanatory variables  
 499 include: T<sub>m</sub> (°C), recent (1901–1989) temperature index; ln MI (unitless), recent  
 500 natural-log-transformed moisture index; Recent Area (km<sup>2</sup>), total land area occupied by a climatic  
 501 condition in the recent period; ΔArea (km<sup>2</sup>), change in total land area occupied by a climatic  
 502 condition from its earliest occurrence (i.e. LGM) to the recent period; Movement (km), geographic  
 503 shift of a climatic condition since its earliest occurrence (i.e. LGM) to the recent period. Different  
 504 GAMs were constructed based on climatic spaces defined by the recent climatic conditions (T<sub>m</sub> and  
 505 ln MI) at four resolutions, with each climatic axis divided into 30, 40, 50 or 60 equal intervals.  
 506 Reported metrics for each model include concurvity,  $\chi^2$  and *p*-value for each explanatory variable,  
 507 and explained deviance (Deviance), predicted R<sup>2</sup> (R<sub>pred</sub><sup>2</sup>) and adjusted R<sup>2</sup> (R<sub>adj</sub><sup>2</sup>) of each GAM  
 508 model, and the sample size (N) fitted into each model.

| 30 equal interval resolution |            |          |                 |          |                                |                               |    |
|------------------------------|------------|----------|-----------------|----------|--------------------------------|-------------------------------|----|
| Predictor                    | Concurvity | $\chi^2$ | <i>p</i> -value | Deviance | R <sub>pred</sub> <sup>2</sup> | R <sub>adj</sub> <sup>2</sup> | N  |
| T <sub>m</sub>               | 0.91       | 3.38     | 0.23            |          |                                |                               |    |
| ln MI                        | 0.88       | 5.27     | < 0.05          |          |                                |                               |    |
| Recent Area                  | 0.95       | 4.64     | < 0.05          | 0.14     | 0.14                           | 0.08                          | 90 |
| ΔArea                        | 0.72       | 0.01     | 0.94            |          |                                |                               |    |

| Movement                     | 0.62       | 0.08     | 0.78            |          |                     |                    |     |
|------------------------------|------------|----------|-----------------|----------|---------------------|--------------------|-----|
| 40 equal interval resolution |            |          |                 |          |                     |                    |     |
| Predictor                    | Concurvity | $\chi^2$ | <i>p</i> -value | Deviance | $R_{\text{pred}}^2$ | $R_{\text{adj}}^2$ | N   |
| T <sub>m</sub>               | 0.90       | 40.20    | < 0.001         |          |                     |                    |     |
| ln MI                        | 0.87       | 35.50    | < 0.001         |          |                     |                    |     |
| Recent Area                  | 0.89       | 5.96     | 0.08            | 0.45     | 0.46                | 0.37               | 137 |
| ΔArea                        | 0.65       | 0.05     | 0.83            |          |                     |                    |     |
| Movement                     | 0.61       | 6.64     | 0.14            |          |                     |                    |     |
| 50 equal interval resolution |            |          |                 |          |                     |                    |     |
| Predictor                    | Concurvity | $\chi^2$ | <i>p</i> -value | Deviance | $R_{\text{pred}}^2$ | $R_{\text{adj}}^2$ | N   |
| T <sub>m</sub>               | 0.87       | 41.92    | < 0.001         |          |                     |                    |     |
| ln MI                        | 0.79       | 42.50    | < 0.001         |          |                     |                    |     |
| Recent Area                  | 0.86       | 2.06     | 0.15            | 0.33     | 0.34                | 0.28               | 187 |
| ΔArea                        | 0.64       | 0.01     | 0.92            |          |                     |                    |     |
| Movement                     | 0.39       | 3.08     | 0.08            |          |                     |                    |     |
| 60 equal interval resolution |            |          |                 |          |                     |                    |     |
| Predictor                    | Concurvity | $\chi^2$ | <i>p</i> -value | Deviance | $R_{\text{pred}}^2$ | $R_{\text{adj}}^2$ | N   |
| T <sub>m</sub>               | 0.87       | 74.10    | < 0.001         |          |                     |                    |     |
| ln MI                        | 0.76       | 55.39    | < 0.001         |          |                     |                    |     |
| Recent Area                  | 0.86       | 17.00    | < 0.001         | 0.39     | 0.39                | 0.34               | 245 |
| ΔArea                        | 0.59       | 4.51     | 0.35            |          |                     |                    |     |
| Movement                     | 0.31       | 4.73     | < 0.05          |          |                     |                    |     |

509 **Table S32 | Spatial auto-correlation test for Generalised Additive Models (GAMs)**  
 510 **incorporating bioclimatic variables and the geographic extent of climate at multiple climatic**  
 511 **space resolutions.** Summary of spatial autocorrelation tests for the residuals of GAMs fitted across  
 512 different geological periods. Species richness is the response variable. Explanatory variables  
 513 include recent (1901–1989) temperature index (T<sub>m</sub>, °C) and natural-log-transformed moisture index  
 514 (ln MI, unitless), and total land area occupied by each climatic condition (Area, km<sup>2</sup>) in different



515 geological periods. Different GAMs were constructed based on climatic spaces defined by the  
 516 recent climatic conditions ( $T_m$  and  $\ln MI$ ) at four resolutions, with each climatic axis divided into 30,  
 517 40, 50 or 60 equal intervals. Potential spatial autocorrelation was assessed using Moran's  $I$  test on  
 518 the residuals of each GAM. Moran's  $I$  index and corresponding  $p$ -value of each GAM are presented  
 519 in the table.

| 30 equal interval resolution            |             |            |
|-----------------------------------------|-------------|------------|
| Geological period                       | Moran's $I$ | $p$ -value |
| Eocene<br>(ca. 50 Ma)                   | 0.26        | < 0.001    |
| Mid-Pliocene<br>(3.3–3.0 Ma)            | 0.29        | < 0.001    |
| Last Glacial Maximum<br>(LGM, 22–18 ka) | 0.33        | < 0.001    |
| Mid-Holocene<br>(ca. 6 ka)              | 0.30        | < 0.001    |
| Pre-industrial<br>(pre-1850)            | 0.28        | < 0.001    |
| Recent period<br>(1901–1989)            | 0.32        | < 0.001    |
| Mean                                    | 0.30        | < 0.001    |
| 40 equal interval resolution            |             |            |
| Geological period                       | Moran's $I$ | $p$ -value |
| Eocene<br>(ca. 50 Ma)                   | 0.33        | < 0.001    |
| Mid-Pliocene<br>(3.3–3.0 Ma)            | 0.34        | < 0.001    |
| Last Glacial Maximum<br>(LGM, 22–18 ka) | 0.40        | < 0.001    |

|                              |      |         |
|------------------------------|------|---------|
| Mid-Holocene<br>(ca. 6 ka)   | 0.40 | < 0.001 |
| Pre-industrial<br>(pre-1850) | 0.34 | < 0.001 |
| Recent period<br>(1901–1989) | 0.38 | < 0.001 |
| Mean                         | 0.39 | < 0.001 |

#### 50 equal interval resolution

| Geological period                       | Moran's <i>I</i> | <i>p</i> -value |
|-----------------------------------------|------------------|-----------------|
| Eocene<br>(ca. 50 Ma)                   | 0.38             | < 0.001         |
| Mid-Pliocene<br>(3.3–3.0 Ma)            | 0.39             | < 0.001         |
| Last Glacial Maximum<br>(LGM, 22–18 ka) | 0.43             | < 0.001         |
| Mid-Holocene<br>(ca. 6 ka)              | 0.41             | < 0.001         |
| Pre-industrial<br>(pre-1850)            | 0.36             | < 0.001         |
| Recent period<br>(1901–1989)            | 0.40             | < 0.001         |
| Mean                                    | 0.40             | < 0.001         |

#### 60 equal interval resolution

| Geological period            | Moran's <i>I</i> | <i>p</i> -value |
|------------------------------|------------------|-----------------|
| Eocene<br>(ca. 50 Ma)        | 0.36             | < 0.001         |
| Mid-Pliocene<br>(3.3–3.0 Ma) | 0.35             | < 0.001         |

|                                         |      |         |
|-----------------------------------------|------|---------|
| Last Glacial Maximum<br>(LGM, 22–18 ka) | 0.40 | < 0.001 |
| Mid-Holocene<br>(ca. 6 ka)              | 0.39 | < 0.001 |
| Pre-industrial<br>(pre-1850)            | 0.34 | < 0.001 |
| Recent period<br>(1901–1989)            | 0.37 | < 0.001 |
| Mean                                    | 0.38 | < 0.001 |

520 **Table S33 | Spatial auto-correlation test for Generalised Additive Models (GAMs) with**  
 521 **species richness as the response variable and climate and its deep-time geographic**  
 522 **dynamics as explanatory variables.** Summary of spatial autocorrelation tests for the residuals of  
 523 GAMs fitted for all recent climatic conditions, as well as separately according to their first  
 524 appearance. Species richness is the response variable. Explanatory variables include:  $T_m$  (°C),  
 525 recent (1901–1989) temperature index;  $\ln MI$  (unitless), recent natural-log-transformed moisture  
 526 index; Recent Area (km<sup>2</sup>), total land area occupied by a climatic condition in the recent period;  
 527  $\Delta Area$  (km<sup>2</sup>), change in total land area occupied by a climatic condition from its earliest occurrence  
 528 to the recent period; Movement (km), geographic shift of a climatic condition since its earliest  
 529 occurrence to the recent period. Different GAMs were constructed based on climatic spaces defined  
 530 by the recent climatic conditions ( $T_m$  and  $\ln MI$ ) at four resolutions, with each climatic axis divided  
 531 into 30, 40, 50 or 60 equal intervals. Potential spatial autocorrelation was assessed using  
 532 Moran's  $I$  test on the residuals of each GAM. Moran's  $I$  index and corresponding  $p$ -value of each  
 533 GAM are presented in the table.

| 30 equal interval resolution |             |            |
|------------------------------|-------------|------------|
| Geological period            | Moran's $I$ | $p$ -value |
| All periods                  | 0.17        | < 0.001    |
| Eocene                       | 0.01        | 0.38       |

|                                         |      |        |
|-----------------------------------------|------|--------|
| (ca. 50 Ma)                             |      |        |
| Mid-Pliocene<br>(3.3–3.0 Ma)            | 0.10 | < 0.05 |
| Last Glacial Maximum<br>(LGM, 22–18 ka) | 0.04 | 0.22   |

#### 40 equal interval resolution

| Geological period                       | Moran's <i>I</i> | <i>p</i> -value |
|-----------------------------------------|------------------|-----------------|
| All periods                             | 0.24             | < 0.001         |
| Eocene<br>(ca. 50 Ma)                   | −0.14            | 0.99            |
| Mid-Pliocene<br>(3.3–3.0 Ma)            | 0.06             | 0.07            |
| Last Glacial Maximum<br>(LGM, 22–18 ka) | −0.05            | 0.80            |

#### 50 equal interval resolution

| Geological period                       | Moran's <i>I</i> | <i>p</i> -value |
|-----------------------------------------|------------------|-----------------|
| All periods                             | 0.27             | < 0.001         |
| Eocene<br>(ca. 50 Ma)                   | −0.02            | 0.58            |
| Mid-Pliocene<br>(3.3–3.0 Ma)            | 0.03             | 0.17            |
| Last Glacial Maximum<br>(LGM, 22–18 ka) | 0.01             | 0.39            |

#### 60 equal interval resolution

| Geological period     | Moran's <i>I</i> | <i>p</i> -value |
|-----------------------|------------------|-----------------|
| All periods           | 0.23             | < 0.001         |
| Eocene<br>(ca. 50 Ma) | −0.01            | 0.59            |

|                                         |       |      |
|-----------------------------------------|-------|------|
| Mid-Pliocene<br>(3.3–3.0 Ma)            | 0.02  | 0.22 |
| Last Glacial Maximum<br>(LGM, 22–18 ka) | –0.05 | 0.87 |

**Table S34 | Spatial auto-correlation test for Generalised Additive Models (GAMs) with species turnover as the response variable and climate and its deep-time geographic dynamics as explanatory variables.** Summary of spatial autocorrelation tests for the residuals of GAMs fitted for all recent climatic conditions, as well as separately according to their first appearance. Turnover component of  $\beta$ -diversity is the response variable. Explanatory variables include:  $T_m$  ( $^{\circ}\text{C}$ ), recent (1901–1989) temperature index;  $\ln MI$  (unitless), recent natural-log-transformed moisture index; Recent Area ( $\text{km}^2$ ), total land area occupied by a climatic condition in the recent period;  $\Delta\text{Area}$  ( $\text{km}^2$ ), change in total land area occupied by a climatic condition from its earliest occurrence to the recent period; Movement (km), geographic shift of a climatic condition since its earliest occurrence to the recent period. Different GAMs were constructed based on climatic spaces defined by the recent climatic conditions ( $T_m$  and  $\ln MI$ ) at four resolutions, with each climatic axis divided into 30, 40, 50 or 60 equal intervals. Potential spatial autocorrelation was assessed using Moran's  $I$  test on the residuals of each GAM. Moran's  $I$  index and corresponding  $p$ -value of each GAM are presented in the table.

| 30 equal interval resolution            |             |            |
|-----------------------------------------|-------------|------------|
| Geological period                       | Moran's $I$ | $p$ -value |
| All periods                             | 0.07        | < 0.05     |
| Eocene<br>(ca. 50 Ma)                   | –0.17       | 0.98       |
| Mid-Pliocene<br>(3.3–3.0 Ma)            | –0.05       | 0.79       |
| Last Glacial Maximum<br>(LGM, 22–18 ka) | 0.02        | 0.34       |

| 40 equal interval resolution            |                  |                 |
|-----------------------------------------|------------------|-----------------|
| Geological period                       | Moran's <i>I</i> | <i>p</i> -value |
| All periods                             | 0.06             | < 0.05          |
| Eocene<br>(ca. 50 Ma)                   | −0.07            | 0.85            |
| Mid-Pliocene<br>(3.3–3.0 Ma)            | 0.02             | 0.28            |
| Last Glacial Maximum<br>(LGM, 22–18 ka) | −0.08            | 0.87            |
| 50 equal interval resolution            |                  |                 |
| Geological period                       | Moran's <i>I</i> | <i>p</i> -value |
| All periods                             | 0.01             | 0.27            |
| Eocene<br>(ca. 50 Ma)                   | −0.05            | 0.82            |
| Mid-Pliocene<br>(3.3–3.0 Ma)            | 0.10             | < 0.01          |
| Last Glacial Maximum<br>(LGM, 22–18 ka) | −0.03            | 0.66            |
| 60 equal interval resolution            |                  |                 |
| Geological period                       | Moran's <i>I</i> | <i>p</i> -value |
| All periods                             | −0.02            | 0.82            |
| Eocene<br>(ca. 50 Ma)                   | −0.10            | 0.99            |
| Mid-Pliocene<br>(3.3–3.0 Ma)            | −0.01            | 0.62            |
| Last Glacial Maximum<br>(LGM, 22–18 ka) | −0.11            | 0.99            |

548 **Table S35 | Spatial auto-correlation test for Generalised Additive Models (GAMs) with**  
549 **phylogenetic diversity as the response variable and climate and its deep-time geographic**  
550 **dynamics as explanatory variables.** Summary of spatial autocorrelation tests for the residuals of  
551 GAMs fitted for all recent climatic conditions, as well as separately according to their first  
552 appearance. Faith's phylogenetic diversity<sup>2</sup> is the response variable. Explanatory variables include:  
553  $T_m$  (°C), recent (1901–1989) temperature index;  $\ln MI$  (unitless), recent natural-log-transformed  
554 moisture index; Recent Area (km<sup>2</sup>), total land area occupied by a climatic condition in the recent  
555 period;  $\Delta Area$  (km<sup>2</sup>), change in total land area occupied by a climatic condition from its earliest  
556 occurrence to the recent period; Movement (km), geographic shift of a climatic condition since its  
557 earliest occurrence to the recent period. Different GAMs were constructed based on climatic spaces  
558 defined by the recent climatic conditions ( $T_m$  and  $\ln MI$ ) at four resolutions, with each climatic axis  
559 divided into 30, 40, 50 or 60 equal intervals. Potential spatial autocorrelation was assessed using  
560 Moran's  $I$  test on the residuals of each GAM. Moran's  $I$  index and corresponding  $p$ -value of each  
561 GAM are presented in the table.

| 30 equal interval resolution            |             |            |
|-----------------------------------------|-------------|------------|
| Geological period                       | Moran's $I$ | $p$ -value |
| All periods                             | 0.25        | < 0.001    |
| Eocene<br>(ca. 50 Ma)                   | 0.04        | 0.24       |
| Mid-Pliocene<br>(3.3–3.0 Ma)            | 0.11        | 0.02       |
| Last Glacial Maximum<br>(LGM, 22–18 ka) | −0.07       | 0.83       |
| 40 equal interval resolution            |             |            |
| Geological period                       | Moran's $I$ | $p$ -value |
| All periods                             | 0.34        | < 0.001    |
| Eocene<br>(ca. 50 Ma)                   | 0.11        | < 0.05     |

|                                         |       |      |
|-----------------------------------------|-------|------|
| Mid-Pliocene<br>(3.3–3.0 Ma)            | 0.01  | 0.39 |
| Last Glacial Maximum<br>(LGM, 22–18 ka) | –0.05 | 0.81 |

#### 50 equal interval resolution

| Geological period                       | Moran's <i>I</i> | <i>p</i> -value |
|-----------------------------------------|------------------|-----------------|
| All periods                             | 0.32             | < 0.001         |
| Eocene<br>(ca. 50 Ma)                   | 0.12             | < 0.01          |
| Mid-Pliocene<br>(3.3–3.0 Ma)            | 0.14             | < 0.001         |
| Last Glacial Maximum<br>(LGM, 22–18 ka) | –0.00047         | 0.46            |

#### 60 equal interval resolution

| Geological period                       | Moran's <i>I</i> | <i>p</i> -value |
|-----------------------------------------|------------------|-----------------|
| All periods                             | 0.31             | < 0.001         |
| Eocene<br>(ca. 50 Ma)                   | 0.14             | < 0.001         |
| Mid-Pliocene<br>(3.3–3.0 Ma)            | 0.04             | 0.12            |
| Last Glacial Maximum<br>(LGM, 22–18 ka) | 0.05             | 0.10            |

**Table S36 | Spatial auto-correlation test for Generalised Additive Models (GAMs) with relative phylogenetic diversity as the response variable and climate and its deep-time geographic dynamics as explanatory variables.** Summary of spatial autocorrelation tests for the residuals of GAMs fitted for all recent climatic conditions, as well as separately according to their first appearance. Relative phylogenetic diversity (calculated as the residuals from regressing phylogenetic diversity against species richness) is the response variable. Explanatory variables



include:  $T_m$  ( $^{\circ}\text{C}$ ), recent (1901–1989) temperature index;  $\ln MI$  (unitless), recent natural-log-transformed moisture index; Recent Area ( $\text{km}^2$ ), total land area occupied by a climatic condition in the recent period;  $\Delta\text{Area}$  ( $\text{km}^2$ ), change in total land area occupied by a climatic condition from its earliest occurrence to the recent period; Movement (km), geographic shift of a climatic condition since its earliest occurrence to the recent period. Different GAMs were constructed based on climatic spaces defined by the recent climatic conditions ( $T_m$  and  $\ln MI$ ) at four resolutions, with each climatic axis divided into 30, 40, 50 or 60 equal intervals. Potential spatial autocorrelation was assessed using Moran's  $I$  test on the residuals of each GAM. Moran's  $I$  index and corresponding  $p$ -value of each GAM are presented in the table.

| 30 equal interval resolution            |             |            |
|-----------------------------------------|-------------|------------|
| Geological period                       | Moran's $I$ | $p$ -value |
| All periods                             | 0.39        | < 0.001    |
| Eocene<br>(ca. 50 Ma)                   | 0.01        | 0.38       |
| Mid-Pliocene<br>(3.3–3.0 Ma)            | 0.18        | < 0.001    |
| Last Glacial Maximum<br>(LGM, 22–18 ka) | −0.10       | 0.91       |
| 40 equal interval resolution            |             |            |
| Geological period                       | Moran's $I$ | $p$ -value |
| All periods                             | 0.45        | < 0.001    |
| Eocene<br>(ca. 50 Ma)                   | 0.02        | 0.34       |
| Mid-Pliocene<br>(3.3–3.0 Ma)            | 0.27        | < 0.001    |
| Last Glacial Maximum<br>(LGM, 22–18 ka) | −0.00021    | 0.45       |

| 50 equal interval resolution            |                  |                 |
|-----------------------------------------|------------------|-----------------|
| Geological period                       | Moran's <i>I</i> | <i>p</i> -value |
| All periods                             | 0.48             | < 0.001         |
| Eocene<br>(ca. 50 Ma)                   | 0.06             | 0.08            |
| Mid-Pliocene<br>(3.3–3.0 Ma)            | 0.29             | < 0.001         |
| Last Glacial Maximum<br>(LGM, 22–18 ka) | 0.11             | < 0.01          |
| 60 equal interval resolution            |                  |                 |
| Geological period                       | Moran's <i>I</i> | <i>p</i> -value |
| All periods                             | 0.44             | < 0.001         |
| Eocene<br>(ca. 50 Ma)                   | 0.02             | 0.28            |
| Mid-Pliocene<br>(3.3–3.0 Ma)            | 0.19             | < 0.001         |
| Last Glacial Maximum<br>(LGM, 22–18 ka) | 0.11             | < 0.01          |

## 578    **References**

- 579    1.    Cai, L. *et al.* Global models and predictions of plant diversity based on advanced machine  
580           learning techniques. *New Phytol.* **237**, 1432–1445 (2023).
- 581    2.    Faith, D. P. Conservation evaluation and phylogenetic diversity. *Biol. Conserv.* **61**, 1–10  
582           (1992).
- 583    3.    Rafiqpoor, D., Kier, G. & Kreft, H. Global centers of vascular plant diversity. *Nov. Acta*  
584           *Leopoldina NF* **92**, 61–83 (2005).
- 585    4.    Kier, G. *et al.* Global patterns of plant diversity and floristic knowledge. *J. Biogeogr.* **32**,  
586           1107–1116 (2005).
- 587    5.    Kreft, H. & Jetz, W. Global patterns and determinants of vascular plant diversity. *Proc. Natl.*  
588           *Acad. Sci.* **104**, 5925–5930 (2007).
- 589    6.    Brummitt, N., Araújo, A. C. & Harris, T. Areas of plant diversity—What do we know?  
590           *Plants, People, Planet* **3**, 33–44 (2021).
- 591    7.    Sabatini, F. M. *et al.* Global patterns of vascular plant alpha diversity. *Nat. Commun.* **13**,  
592           4683 (2022).
- 593    8.    Govaerts, R., Nic Lughadha, E., Black, N., Turner, R. & Paton, A. The World Checklist of  
594           Vascular Plants, a continuously updated resource for exploring global plant diversity. *Sci.*  
595           *data* **8**, 215 (2021).
- 596    9.    Weigelt, P., König, C. & Kreft, H. GIFT—A global inventory of floras and traits for  
597           macroecology and biogeography. *J. Biogeogr.* **47**, 16–43 (2020).
- 598    10.   Steinig, S.; Abe-Ouchi, A.; de Boer, A.M.; Chan, W.-L.; Donnadieu, Y.; Hutchinson, D.;  
599           Knorr, G.; Ladant, J.-B.; Morozova, P.; Niezgodzki, I.; Poulsen, C.J.; Volodin, E.M.; Zhang,  
600           Z.; Zhu, J.; Lunt, D. J. Deep-Time Model Intercomparison Project (DeepMIP) Eocene model  
601           data    version    1.0.    *NERC    EDS    Cent.    Environ.    Data    Anal.*    (2024)  
602           doi:10.5285/95aa41439d564756950f89921b6ef215.
- 603    11.   Hurrell, J. W. *et al.* The community earth system model: a framework for collaborative  
604           research. *Bull. Am. Meteorol. Soc.* **94**, 1339–1360 (2013).

- 605 12. Lunt, D. J. *et al.* DeepMIP: Model intercomparison of early Eocene climatic optimum  
606 (EECO) large-scale climate features and comparison with proxy data. *Clim. Past* **17**, 203–  
607 227 (2021).
- 608 13. Delworth, T. L. *et al.* GFDL’s CM2 global coupled climate models. Part I: Formulation and  
609 simulation characteristics. *J. Clim.* **19**, 643–674 (2006).
- 610 14. Bentsen, M. *et al.* The Norwegian Earth System Model, NorESM1-M–Part 1: description and  
611 basic evaluation of the physical climate. *Geosci. Model Dev.* **6**, 687–720 (2013).
- 612 15. Kageyama, M. *et al.* PMIP4-CMIP6: the contribution of the Paleoclimate Modelling  
613 Intercomparison Project to CMIP6. *Geosci. Model Dev. Discuss.* **11**, 1033–1057 (2018).
- 614 16. Danabasoglu, G. *et al.* The community earth system model version 2 (CESM2). *J. Adv.*  
615 *Model. Earth Syst.* **12**, e2019MS001916 (2020).
- 616 17. Kelley, M. *et al.* GISS-E2. 1: Configurations and climatology. *J. Adv. Model. Earth Syst.* **12**,  
617 e2019MS002025 (2020).
- 618 18. Miller, R. L. *et al.* CMIP6 historical simulations (1850–2014) with GISS-E2. 1. *J. Adv.*  
619 *Model. Earth Syst.* **13**, e2019MS002034 (2021).
- 620 19. Andrews, M. B. *et al.* Historical simulations with HadGEM3-GC3. 1 for CMIP6. *J. Adv.*  
621 *Model. Earth Syst.* **12**, e2019MS001995 (2020).
- 622 20. Semmler, T. *et al.* Simulations for CMIP6 with the AWI climate model AWI-CM-1-1. *J. Adv.*  
623 *Model. Earth Syst.* **12**, e2019MS002009 (2020).
- 624 21. Mauritsen, T. *et al.* Developments in the MPI-M Earth System Model version 1.2 (MPI-  
625 ESM1. 2) and its response to increasing CO<sub>2</sub>. *J. Adv. Model. Earth Syst.* **11**, 998–1038  
626 (2019).
- 627 22. Yukimoto, S. *et al.* The Meteorological Research Institute Earth System Model version 2.0,  
628 MRI-ESM2. 0: Description and basic evaluation of the physical component. *J. Meteorol. Soc.*  
629 *Japan. Ser. II* **97**, 931–965 (2019).
- 630 23. Cao, J. *et al.* The NUIST Earth System Model (NESM) version 3: description and  
631 preliminary evaluation. *Geosci. Model Dev.* **11**, 2975–2993 (2018).

- 632 24. Seland, Ø. *et al.* Overview of the Norwegian Earth System Model (NorESM2) and key  
633 climate response of CMIP6 DECK, historical, and scenario simulations. *Geosci. Model Dev.*  
634 **13**, 6165–6200 (2020).
- 635 25. Eyring, V. *et al.* Overview of the Coupled Model Intercomparison Project Phase 6 (CMIP6)  
636 experimental design and organization. *Geosci. Model Dev.* **9**, 1937–1958 (2016).
- 637 26. Bi, D. *et al.* Configuration and spin-up of ACCESS-CM2, the new generation Australian  
638 community climate and earth system simulator coupled model. *J. South. Hemisph. Earth Syst.*  
639 *Sci.* **70**, 225–251 (2020).
- 640 27. Tatebe, H. *et al.* Description and basic evaluation of simulated mean state, internal variability,  
641 and climate sensitivity in MIROC6. *Geosci. Model Dev.* **12**, 2727–2765 (2019).
- 642 28. University of East Anglia Climatic Research Unit; Harris, I.C.; Jones, P.D.; Osborn, T. CRU  
643 TS4.09: Climatic Research Unit (CRU) Time-Series (TS) version 4.09 of high-resolution  
644 gridded data of month-by-month variation in climate (Jan. 1901- Dec. 2024). *NERC EDS*  
645 *Cent. Environ. Data Anal.* (2025).
- 646 29. Fick, S. E. & Hijmans, R. J. WorldClim 2: new 1-km spatial resolution climate surfaces for  
647 global land areas. *Int. J. Climatol.* **37**, 4302–4315 (2017).
